# Supplementary material for: Study protocol for a randomised-controlled study on emotion regulation training for adolescents with major depression: the KONNI study
Source: PubMed Central journal article supplement — BMJ Open. 2020 Sep 10;10(9):e036093. doi: 10.1136/bmjopen-2019-036093 (PMC7485251; doi:10.1136/bmjopen-2019-036093), 2020-09-10
Supplement: bmjopen-2019-036093.draft_revisions.pdf [file bmjopen-2019-036093.draft_revisions.pdf]

# BMJ Open

BMJ Open is committed to open peer review. As part of this commitment we make the peer review history of every article we publish publicly available.

When an article is published we post the peer reviewers' comments and the authors' responses online. We also post the versions of the paper that were used during peer review. These are the versions that the peer review comments apply to.

The versions of the paper that follow are the versions that were submitted during the peer review process. They are not the versions of record or the final published versions. They should not be cited or distributed as the published version of this manuscript.

BMJ Open is an open access journal and the full, final, typeset and author-corrected version of record of the manuscript is available on our site with no access controls, subscription charges or pay-per-view fees (<http://bmjopen.bmj.com>).

If you have any questions on BMJ Open's open peer review process please email [info.bmjopen@bmj.com](mailto:info.bmjopen@bmj.com)

# BMJ Open

## Study protocol for a randomized-controlled study on emotion regulation training for adolescents with major depression: the KONNI study

|                               |                                                                                                                                                                                                                                                                                                                                                                                                                                                                                                                                                                                                                                                                                                                                                                                                                                                                                                                                                                  |
|-------------------------------|------------------------------------------------------------------------------------------------------------------------------------------------------------------------------------------------------------------------------------------------------------------------------------------------------------------------------------------------------------------------------------------------------------------------------------------------------------------------------------------------------------------------------------------------------------------------------------------------------------------------------------------------------------------------------------------------------------------------------------------------------------------------------------------------------------------------------------------------------------------------------------------------------------------------------------------------------------------|
| Journal:                      | <i>BMJ Open</i>                                                                                                                                                                                                                                                                                                                                                                                                                                                                                                                                                                                                                                                                                                                                                                                                                                                                                                                                                  |
| Manuscript ID                 | bmjopen-2019-036093                                                                                                                                                                                                                                                                                                                                                                                                                                                                                                                                                                                                                                                                                                                                                                                                                                                                                                                                              |
| Article Type:                 | Protocol                                                                                                                                                                                                                                                                                                                                                                                                                                                                                                                                                                                                                                                                                                                                                                                                                                                                                                                                                         |
| Date Submitted by the Author: | 29-Nov-2019                                                                                                                                                                                                                                                                                                                                                                                                                                                                                                                                                                                                                                                                                                                                                                                                                                                                                                                                                      |
| Complete List of Authors:     | Greimel, Ellen; University Hospital Munich, Department of Child and Adolescent Psychiatry, Psychosomatics and Psychotherapy<br>Feldmann, Lisa; University Hospital Munich, Department of Child and Adolescent Psychiatry, Psychosomatics and Psychotherapy<br>Piechaczek, Charlotte; University Hospital Munich, Department of Child and Adolescent Psychiatry, Psychosomatics and Psychotherapy<br>Oort, Frans; University of Amsterdam, Research Institute of Child Development and Education<br>Bartling, Juergen; University Hospital Munich, Department of Child and Adolescent Psychiatry and Psychotherapy<br>Schulte-Rüther, Martin; RWTH Aachen University, Translational Brain Medicine in Psychiatry and Neurology, Department of Child and Adolescent Psychiatry, Psychosomatics, and Psychotherapy; JARA-Brain<br>Schulte-Körne, Gerd ; University Hospital Munich, Department of Child and Adolescent Psychiatry, Psychosomatics and Psychotherapy |
| Keywords:                     | Child & adolescent psychiatry < PSYCHIATRY, Depression & mood disorders < PSYCHIATRY, Clinical trials < THERAPEUTICS, NEUROPHYSIOLOGY                                                                                                                                                                                                                                                                                                                                                                                                                                                                                                                                                                                                                                                                                                                                                                                                                            |
|                               |                                                                                                                                                                                                                                                                                                                                                                                                                                                                                                                                                                                                                                                                                                                                                                                                                                                                                                                                                                  |

SCHOLARONE™  
Manuscripts

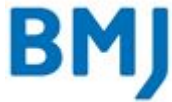

I, the Submitting Author has the right to grant and does grant on behalf of all authors of the Work (as defined in the below author licence), an exclusive licence and/or a non-exclusive licence for contributions from authors who are: i) UK Crown employees; ii) where BMJ has agreed a CC-BY licence shall apply, and/or iii) in accordance with the terms applicable for US Federal Government officers or employees acting as part of their official duties; on a worldwide, perpetual, irrevocable, royalty-free basis to BMJ Publishing Group Ltd ("BMJ") its licensees and where the relevant Journal is co-owned by BMJ to the co-owners of the Journal, to publish the Work in this journal and any other BMJ products and to exploit all rights, as set out in our [licence](#).

The Submitting Author accepts and understands that any supply made under these terms is made by BMJ to the Submitting Author unless you are acting as an employee on behalf of your employer or a postgraduate student of an affiliated institution which is paying any applicable article publishing charge ("APC") for Open Access articles. Where the Submitting Author wishes to make the Work available on an Open Access basis (and intends to pay the relevant APC), the terms of reuse of such Open Access shall be governed by a Creative Commons licence – details of these licences and which [Creative Commons](#) licence will apply to this Work are set out in our licence referred to above.

Other than as permitted in any relevant BMJ Author's Self Archiving Policies, I confirm this Work has not been accepted for publication elsewhere, is not being considered for publication elsewhere and does not duplicate material already published. I confirm all authors consent to publication of this Work and authorise the granting of this licence.

# Study protocol for a randomized-controlled study on emotion regulation training for adolescents with major depression: the KONNI study

Ellen Greimel<sup>a\*</sup>, Lisa Feldmann<sup>a\*</sup>, Charlotte Piechaczek<sup>a</sup>, Frans Oort<sup>b</sup>, Jürgen Bartling<sup>a</sup>, Martin Schulte-Rüther<sup>c,d</sup> & Gerd Schulte-Körne<sup>a</sup>

<sup>a</sup>Department of Child and Adolescent Psychiatry, Psychosomatics and Psychotherapy, University Hospital, LMU Munich, Munich, Germany

<sup>b</sup>Research Institute of Child Development and Education, University of Amsterdam, Amsterdam, The Netherlands

<sup>c</sup>Translational Brain Medicine in Psychiatry and Neurology, Department of Child and Adolescent Psychiatry, Psychosomatics, and Psychotherapy, RWTH Aachen University

<sup>d</sup>JARA-Brain, Aachen, Germany

\*shared first-authorship

## Address for reprints or correspondence:

Ellen Greimel, Department of Child and Adolescent Psychiatry and Psychotherapy, University Hospital Munich, Munich, Germany

E-mail: [Ellen.Greimel@med.uni-muenchen.de](mailto:Ellen.Greimel@med.uni-muenchen.de), Phone: +49 89 4400 56952, Fax: +49 89 4400 55902

**Word count: 4.221 (3.927 excluding the Discussion)**

## Abstract

**Introduction:** Major depression (MD) often has its onset during adolescence and is associated with significant morbidity and mortality. One important factor for the development and maintenance of adolescent MD are disturbances in emotion regulation and the underlying neural processes. Cognitive reappraisal (CR) is a particular adaptive emotion regulation strategy. Previously, it has been shown in healthy adults that a task-based training in CR is efficient to reduce negative affect, and that these effects translate into everyday life.

The present randomized-controlled trial examines for the first time whether a task-based training in CR proves effective in MD adolescents. Specifically, we will investigate whether the CR training improves the ability to down-regulate negative affect in MD individuals as assessed by behavioral and neurobiological indices, and whether training effects generalize outside the laboratory.

**Methods and analysis:** Adolescents with MD will be randomly allocated to a group that either receives a task-based training in CR or control training. Both involve four training sessions over a time period of two weeks. In the CR training, participants will be instructed to down-regulate negative affective responses to negative pictures by means of CR, while the control training involves picture viewing. During the training sessions, the Late Positive Potential, gaze fixations on negative picture aspects and affective responses to pictures will be collected. Before and after the training programs, and at a two-week follow-up, overall negative and positive affect, rumination and perceived stress will be assessed as primary outcomes. ANOVAs will be conducted to test the effectiveness of the CR training with regard to both primary outcomes and task-based behavioral and neurobiological parameters.

**Ethics and dissemination:** The study was approved by the institutional review board of the local ethics committee. The results will be published in peer-reviewed journals and disseminated through conferences, social media and public events.

**Trial Registration:** Clinical Trials NCT03957850, registered Mai 21st 2019; URL: <https://clinicaltrials.gov/ct2/show/NCT03957850>.

### Strengths and limitations of the study:

- This study is the first to examine the effectiveness of a targeted CR training in youths with major depression.
- A randomized-controlled design is employed including an active control group.
- In addition to behavioral and questionnaire data, objective neurobiological indices will be collected to assess the effectiveness of the CR training.
- If proven effective, the CR training can be a promising and cost-effective approach to complement and enhance the efficacy of established treatments for adolescent MD.
- As the follow-up is limited to two weeks, the long-term effectiveness needs to be explored in future studies.

## Introduction

Major depression (MD) is among the most debilitating, costly and common psychiatric disorders worldwide.[1] The risk of suffering from a depressive episode sharply rises during adolescence, with point prevalence rates of up to 7%.[2] Adolescents with MD show deficient emotion regulation (ER),[3] i.e., they have difficulties to modulate emotional responses by initiating appropriate regulatory processes.[4] Disturbances in ER and the underlying neural processes have been suggested to be an important risk factor for the development and maintenance of MD.[3, 5] Thus, the development of training regimens that target deficient ER in MD is an important research avenue.

Cognitive-behavioral therapy (CBT) belongs to the gold standard treatments in juvenile MD. However, less than 50% of MD adolescents respond to CBT and only about one third enter remission after treatment.[6, 7] Given the debilitating consequences of adolescent MD,[8] there is an urgent need to enhance the efficacy of established intervention. Recent findings in adults with MD suggest that an additional training of ER might be a promising approach to improve treatment effects.[9, 10] To date, it remains unclear whether these findings can be transferred to juvenile MD. In this regard, the present study takes a first step and systematically investigates the effects of a focused ER training in adolescent MD.

## Cognitive reappraisal in depressed individuals

Cognitive reappraisal (CR) is a frequently studied ER strategy and involves the reinterpretation of a situation such that the emotional response is changed. The habitual use of CR has been shown to relate to good interpersonal functioning and well-being.[11] Questionnaire studies have found that depressive symptoms are associated with less habitual use of CR.[12-14] To experimentally investigate CR in MD, studies applied a well-established CR paradigm during which participants are instructed to reappraise negative pictures. This regulation condition is compared to an unregulated condition, during which participants are asked to simply attend to negative stimuli. Within the framework of this paradigm, a number of studies in MD collected behavioral measures of self-reported affect to assess regulation success. Contrary to expectation, some studies found no group differences between depressive and healthy participants in this index of CR.[15, 16, but see 17] However, these results might be biased due

1  
2  
3 to social desirability which probably obscures group differences. Moreover, complex ER disturbances  
4 are unlikely to be captured using simple affect ratings,[18, see also 19] highlighting the importance of  
5 additionally assessing objective and more sensitive parameters when studying CR, including  
6 neurobiological indices.  
7  
8  
9

10  
11 A commonly studied neurobiological index of CR is the Late Positive Potential (LPP). Studies in healthy  
12 samples show that the LPP is reduced when individuals are instructed to reappraise unpleasant stimuli  
13 compared to attending to unpleasant pictures.[e.g. 20, 21, 22] This decrease is thought to reflect a  
14 reduction of the emotional response following CR, which may result from a shift in stimulus  
15 meaning.[23, 24] Depressive psychopathology has been shown to be associated with a smaller reduction  
16 of the LPP during CR.[23, 25, 26] However, to date, no study has investigated whether this  
17 neurobiological disturbance can be normalized by a repeated training of CR.  
18  
19  
20  
21  
22  
23  
24  
25

26 Besides the LPP, a number of studies in healthy individuals have investigated gaze fixation patterns to  
27 gain insight into the mechanisms underlying CR.[e.g. 27, 28, 29] They found that a greater regulation  
28 success is paralleled by less gaze fixations directed towards negative picture cues. This suggests that the  
29 regulatory effects of CR may partly be attributed to gaze deployment, highlighting the importance of  
30 also assessing gaze fixation when examining CR.  
31  
32  
33  
34  
35  
36  
37  
38

### 39 **Trainability of cognitive reappraisal**

40  
41 Evidence from a randomized controlled trial (RCT) in adult MD suggests that systematically training  
42 ER skills in addition to standard CBT improves treatment efficacy.[9, see also 10] As the ER training  
43 of this RCT aimed at enhancing general ER skills and included CR among other ER strategies, the  
44 unique contribution of CR remains to be investigated. A recent investigation addressed this issue  
45 experimentally in healthy adults,[30] demonstrating that a task-based CR training resulted in less  
46 perceived stress in daily life. Beneficial effects of a task-based CR training have recently also been  
47 shown in healthy and anxious adolescents.[31] While these results are encouraging, it needs to be  
48 examined whether the findings can be extended to MD samples.  
49  
50  
51  
52  
53  
54  
55  
56  
57  
58  
59

### 60 **Aim of the study**

1  
2  
3 The aim of the study is to assess whether in MD adolescents, a task-based CR training results in an  
4 improved downregulation of negative affective responses as assessed by behavioral and neurobiological  
5 indices. Moreover, the study aims to investigate whether the training effects generalize outside the  
6 laboratory, i.e., lead to affect-related changes and a reduction in perceived stress.  
7  
8

9  
10  
11 It is hypothesized that over the course of the CR training, MD adolescents show improvements in the  
12 downregulation of negative affective responses as assessed by task-based behavioral[30] and  
13 neurobiological indices. Based on prior research,[30, 31] it is further hypothesized that the CR training  
14 results in improvements in affect- and stress-related symptoms in daily life.  
15  
16  
17  
18  
19  
20  
21  
22

### 23 **Methods and analysis**

24  
25 The study (Public and scientific Title: Cognitive Reappraisal in Adolescents with Major Depression:  
26 From Neurobiological Mechanisms to Intervention; German acronym: KONNI) was prospectively  
27 registered on ClinicalTrials.gov (NCT03957850) before recruitment start. The study protocol and the  
28 template informed consent/assent forms (including two amendments) were approved by the institutional  
29 review board of the local ethics committee (Ludwig-Maximilians-University Medical Division Ethics  
30 Committee, Munich, Germany; study ID: 63-16) on 30<sup>th</sup> January 2019 and are reported in line with the  
31 Standard Protocol Items: Recommendations for Interventional Trials Statement (SPIRIT 2013).  
32  
33 Important modifications to the study protocol would require an additional amendment, which would  
34 have to be approved by the Ethics Committee before implementation. The trial registry  
35 (ClinicalTrials.gov) would then be updated.  
36  
37  
38  
39  
40  
41  
42  
43  
44  
45  
46  
47  
48

### 49 **Design**

50  
51 This interventional study is designed as a short-term randomized controlled, participant-blind clinical  
52 superiority trial including two parallel groups of MD adolescents. Participants will be randomly assigned  
53 to a group that receives task-based training in CR or to a control training. All participants will take part  
54 in one diagnostic assessment (T0), four training sessions (T1-4) over the course of two weeks, and a  
55 follow-up two weeks after T4. All questionnaires and test procedures are summarized in Table 1. During  
56  
57  
58  
59  
60



1  
2  
3 the training sessions, task-based indices of CR will be continuously assessed based on behavioral affect  
4 ratings and the LPP. Moreover, eye gaze will be recorded during the task-based training. The KONNI  
5 study design is depicted in Figure 1.  
6  
7  
8  
9

## 10 11 **Participants**

12  
13 Participants aged 12-18 years with a current ICD-10 diagnosis of MD,[32] an IQ of  $\geq 80$  and sufficient  
14 German language skills will be included. The following exclusion criteria will be applied: acute  
15 suicidality, neurological disorders, schizophrenic disorder, pervasive developmental disorder, bipolar  
16 disorder, borderline personality disorder, substance dependence disorder and gender dysphoria.  
17  
18 Participants with other psychiatric comorbidities are included if MD is the primary diagnosis.  
19  
20  
21  
22  
23  
24  
25  
26

## 27 **Recruitment**

28  
29 MD adolescents will be primarily recruited from the Department of Child and Adolescent Psychiatry,  
30 Psychosomatics and Psychotherapy, University Hospital of the LMU Munich, Germany. Currently  
31 untreated MD patients from the waiting list, and in-and outpatients are enrolled in the study. The first  
32 participant was enrolled in May 27<sup>th</sup>, 2019. The planned completion of participant enrollment is in April  
33 2021. Since the start of the study n=15 subjects were enrolled.  
34  
35  
36  
37  
38  
39  
40  
41

## 42 **Procedure**

43  
44 Adolescents and one parent/legal custodian (for participants <18 years) will be contacted by a study  
45 nurse and will be informed about the study details, including the fact that the allocation to the training  
46 groups will be made based on a predefined randomization list. In case of interest in participation, their  
47 written informed consent/assent will be collected. In the written informed consent/assent, participants  
48 and their parent/legal custodian are asked for their permission that the data can also be used for an  
49 ancillary case-control study on neurobiological underpinnings of ER in MD. The participants and the  
50 parent/legal custodian will be blinded regarding allocation to the CR/control training group until study  
51 completion and only unblinded prior to study completion if they terminate participation prematurely. At  
52 the first session (T0), a diagnostic interview and other baseline measures (see below) will be applied to  
53  
54  
55  
56  
57  
58  
59  
60

1  
2  
3 the adolescent and will last ~2,5 hours. The diagnostic session will be conducted by psychologically  
4 trained staff.  
5

6  
7 If the participant is eligible for the study, the following session appointments will be scheduled and the  
8 participant will be randomly allocated to the CR or the control training group. To ensure allocation  
9 concealment, the random allocation to one of the groups is implemented after completion of baseline  
10 measurements; i.e., neither the recruiter nor the person conducting the baseline session know to which  
11 group the participant will be assigned after T0. Randomization stratifying for age (<15 years vs. ≥15  
12 years of age)<sup>1</sup> and sex will be performed by a statistician, who is neither involved in recruitment nor in  
13 testing of participants. The randomization will be performed with a 1:1 allocation. A follow-up session  
14 will take place two weeks after completion of the fourth training session. After the follow-up, participants  
15 are unblinded regarding group allocation. As expense allowance for study participation (~10 hours  
16 including follow-up), the participants will receive 100€. Participation is voluntary and can be  
17 discontinued at any time for any reason. Participation is discontinued in case of acute suicidality during  
18 the study. No other criteria for discontinuation are defined. Treatment fidelity concerning the training is  
19 assured by standardized oral and written instructions and by comprehensive training of the  
20 experimenters. The concomitant treatment as usual is permitted during the ongoing study and  
21 information on the type of treatment during the study will be assessed along with any spontaneously  
22 reported adverse effects.  
23  
24  
25  
26  
27  
28  
29  
30  
31  
32  
33  
34  
35  
36  
37  
38  
39  
40  
41  
42

### 43 **Cognitive Reappraisal Training**

44  
45 The CR training task is well-established and is adapted from previous studies.[e.g. 22, 33-35] An  
46 exemplary illustration of an experimental trial is depicted in Figure 2. Participants will be presented  
47 emotional pictures which are preceded by a condition specific cue signaling the appropriate strategy  
48 (attend vs. reappraise) during picture presentation. Following each picture, participants are instructed to  
49 indicate their affective response to the image on the portrait version of the nine-point self-assessment  
50 manikin scale for valence.[SAM; 36, for the portrait version see 37, 38] A higher score on this scale  
51  
52  
53  
54  
55  
56  
57  
58  
59

---

60 <sup>1</sup> Based on prior studies in MD adolescents conducted in our department, 15 is the expected approximate median age of MD participants.

1  
2  
3 indicates a more positive valence rating. The task involves four conditions: 1) **Negative-reappraise:**  
4 participants are asked to view negative pictures and to decrease their affective response by reappraising  
5 the negative event. Participants are explicitly instructed to use the reinterpretation tactic during CR,  
6 which involves “mentally changing the meaning of the actions, context and/or outcome depicted in a  
7 stimulus”.<sup>[30]</sup> 2) **Negative-attend**, 3) **Neutral-attend** and 4) **Positive-attend:** participants are asked  
8 to view the pictures and to respond naturally to them without trying to alter their affective response.  
9  
10 Comparison of the negative-reappraise and the negative-attend conditions allows assessing behavioral  
11 and neural indices of reappraisal success. The neutral-attend and the positive-attend conditions are  
12 included to avoid slight changes in negative affect due to the exclusive presentation of unpleasant  
13 pictures.<sup>[39]</sup>

14  
15 The training task will be repeated over four training sessions. Before the first session, participants will  
16 complete a comprehensive practice training, during which a trained experimenter will provide  
17 standardized oral instructions regarding the task and the two strategies (attend, reappraise).<sup>[30]</sup>  
18 Thereafter, walk-through images are presented to confirm the appropriate use of the strategies. Task  
19 instructions will be briefly summarized before each training session.

20  
21 In each training session, 144 pictures will be presented in 3 blocks, each containing 12 positive-attend,  
22 12 neutral-attend, 12 negative-attend, and 12 negative-reappraise trials. Pictures are taken from the  
23 International Affective Picture System (IAPS),<sup>[40]</sup> Besançon Affective Picture Set-  
24 Adolescents,<sup>[BAPS-Ado; 41]</sup> and Besançon Affective Picture Set-Adults,<sup>[BAPS-Adult; 42]</sup> with the  
25 latter two sets being derived from the Besançon Attachment Pictures Set. Each picture will be presented  
26 twice over the course of the training.<sup>[30]</sup> To ensure adherence to task instructions, participants will fill  
27 in a questionnaire after each training session to indicate which strategies they used during the task.

### 51 **Control training**

52  
53 The control training is implemented to account for unspecific effects and the task employed is similar  
54 to the CR task except that it involves no “negative-reappraise” condition. Instead, the control task only  
55 involves attend conditions (negative-attend, neutral-attend, positive-attend). To keep the total number  
56 of trials involving negative pictures constant across the two groups, the control task involves twice as  
57  
58  
59  
60

1  
2  
3 many negative-attend trials as the CR training group. Mirroring the CR training procedure, the control  
4 training is repeated over four sessions and preceded by standardized oral instructions and a practice  
5 session. Participants of the control training group will also fill in a questionnaire on how they resolved  
6 the task after each training session.  
7  
8  
9  
10

## 11 12 13 **Measures**

14 Information about psychometric properties of all measures described in the following paragraph are  
15 summarized in Table 1 along with the respective assessments points.  
16  
17  
18  
19

### 20 21 22 **Diagnostic measures**

23 A diagnosis of MD and potential comorbidities will be assessed using a well-established German  
24 standardized semi-structured diagnostic interview (Kinder-DIPS).[43, 44] The interview will be  
25 administered by experienced, psychologically trained staff. IQ will be estimated based on the first part  
26 of the CFT-20-R.[45] For some patients, results from other established IQ tests [e.g. WISC-V; 46] will  
27 be available from routine care, which will be used instead.  
28  
29  
30  
31  
32  
33  
34  
35  
36

### 37 38 **Outcome measures**

#### 39 **Primary outcomes**

40 The primary outcomes of the study are (1) change in rumination from baseline (T0) to post-training  
41 (directly after T4) and follow-up [assessed by the scales "self-focused rumination" and "symptom-  
42 focused rumination" of the German short version of the Response Styles Questionnaire; RSQ-D; 47];  
43 (2) change in depressive symptoms [assessed by the German version of the Beck Depression Inventory  
44 – Second Edition; BDI-II; 48] from baseline (T0) to post-training (directly after T4); (3) change in  
45 perceived stress over the course of the four training sessions and at follow-up [assessed by the German  
46 translation of the Perceived Stress Scale 10; PSS-10; by Prof. Dr. Arndt Büssing; 49]<sup>2</sup>; (4) changes in  
47 negative and positive affect [assessed by the Negative Affect Scale and Positive Affect Scale for  
48  
49  
50  
51  
52  
53  
54  
55  
56  
57  
58  
59  
60

---

<sup>2</sup>In the PSS-10, items were reworded to “in the past few days” instead of “in general” to better allow assessing changes of the course of the training.

1  
2  
3 Children Shortened Version; PANAS-C-SF; 50] over the course of the four training sessions and at  
4  
5 follow-up.  
6  
7  
8

### 9 **Secondary outcomes**

10 One secondary outcome is the change in the downregulation of affective behavioral responses to  
11 negative pictures by means of CR. Affective behavioral responses to negative pictures will be  
12 continuously assessed during each of the four training sessions using the SAM rating scale.[36, with the  
13 portrait version from 37, 38]  
14

15 Another secondary outcome is the change in the downregulation of the early and late LPP amplitude to  
16 negative pictures by means of CR. The LPP elicited to pictures in the negative-attend and the negative-  
17 reappraise condition will be continuously assessed during each of the four training sessions.  
18 Additionally, changes in the percent duration of gaze fixations within a-priori defined emotional interest  
19 areas of negative pictures<sup>3</sup> will be assessed during both the negative-attend and negative-reappraise  
20 condition over the course of the four training sessions.  
21

22 All secondary outcome measures will only be assessed in the CR training group, as participants in the  
23 control training group are not instructed to apply CR. However, these measures will also be assessed in  
24 the control training group during the negative-attend condition to allow additional exploratory analyses.  
25  
26  
27  
28  
29  
30  
31

### 32 **Confounding variable**

33 Participants will complete the Social Desirability Scale.[SES-17; 51] The rationale for assessing this  
34 confounding variable is that behavioral ratings of affective responses to pictures will be assessed, which  
35 are prone to response biases.[18]  
36  
37  
38  
39  
40

### 41 **Mediators**

42 State rumination during the training will be treated as a potential mediator as ruminative thoughts might  
43 hamper beneficial training effects.[52] After completion of each training session, participants in the CR  
44  
45  
46  
47  
48  
49  
50  
51  
52  
53  
54  
55  
56  
57  
58  
59  
60

---

<sup>3</sup>Emotional areas of interest of negative pictures will be defined based on a separate validation study.

1  
2  
3 and control training group rate state rumination during the task on a scale from 0 “not at all” to 10  
4  
5 “exactly” based on a 5-item questionnaire applied in a previous study.[53]

6  
7 We will also assess a potential mediating role of executive function abilities, which are thought to be  
8  
9 critically involved in ER.[54] Individual baseline differences in executive function abilities might thus  
10  
11 prove important mediators of training outcome. Therefore, set-shifting, working memory and inhibition  
12  
13 [55, 56] as the three core components of executive functions will be assessed based on the TAP  
14  
15 2.3.[Testbatterie zur Aufmerksamkeitsprüfung; 57]

16  
17 Moreover, we will treat habitual ER as a potential mediator, which will be assessed based on the FEEL-  
18  
19 KJ [58]. The FEEL-KJ is a self-report questionnaire assessing habitual adaptive and maladaptive ER  
20  
21 strategies.  
22  
23

## 24 25 26 **Moderators**

27  
28 As anxiety disorders/symptoms frequently co-occur with MD,[59] state and trait anxiety will be assessed  
29  
30 based on the State-Trait-Anxiety Inventory (STAI).[60] Moreover, symptoms of psychopathology will  
31  
32 be screened using the Child Behavior Checklist (CBCL 6-18R).[61] Both variables will be treated as  
33  
34 potential moderators.  
35  
36

## 37 38 39 **Eye-tracking apparatus**

40  
41 During the four training sessions, eye-movements will be continuously recorded using the Eyelink 1000  
42  
43 Plus SR Research eye-tracker. At the beginning of the training, participants are seated at the viewing  
44  
45 distance of approx. 55 cm from the monitor and a 9-point calibration is performed. Prior to each  
46  
47 experimental trial, a drift correction is conducted.  
48  
49

## 50 51 52 **Electroencephalogram recording and preprocessing**

53  
54 The electroencephalogram data is recorded using the Electrical Geodesic Inc. 128-channel system with  
55  
56 500 Hz sampling rate and Cz as reference electrode. Impedance is kept below 50 k $\Omega$  during recording.  
57  
58 The further preprocessing and analyses steps will be performed with Brainvision Analyzer 2.1 (Brain  
59  
60 Products GmbH, Germany). After filtering, removal of electro-oculographic artefacts based on

1  
2  
3 Independent Component Analysis and exclusion of other artefacts, the signal will be re-referenced. Data  
4 will be segmented into epochs, baseline-corrected and averaged separately for each participant and  
5 condition. The LPP will be measured as the mean amplitude at a centro-parietal region-of-interest within  
6 early (<300ms) and late time windows ( $\geq 300$  ms) following picture onset.[33, 62]  
7  
8  
9  
10

### 11 12 13 **Data management and confidentiality**

14  
15 All data will be entered electronically in IBM SPSS statistics by a scientific assistant. Plausibility and  
16 completeness checks will be regularly performed by E.G., L.F., C.P. to promote and monitor data  
17 quality. Original documents will be maintained for 15 years in the department. All original and  
18 electronic data is stored on the hospitals server under a pseudorandomized coded ID, which does not  
19 contain names or birth dates of the participants. Only the project leader and her deputies have access to  
20 the participants' names and the corresponding allocation to the encryption code and the original  
21 documents, which are kept in locked cabinets. The records containing names and other personal  
22 identifiers (e.g., informed consent/assent forms) will be stored in locked cabinets separately from the  
23 study records which are identified by the coded ID. The participants' study information will not be  
24 released outside the study, except in case of threat to self or threat to others. The final cleaned data sets  
25 will be provided to all investigators of the study. To adhere to principles of open science and to facilitate  
26 further use of aggregated data in meta-analytic approaches, we will consider making raw data available  
27 to other researchers if this can be achieved along with protecting sensitive patient information, such as  
28 sociodemographic information. Since patients could possibly be identified by making our raw data  
29 publicly available, ethical principles of protecting patient confidentiality would be breached. Aggregated  
30 group data can be made available upon request.  
31  
32  
33  
34  
35  
36  
37  
38  
39  
40  
41  
42  
43  
44  
45  
46  
47  
48  
49  
50  
51

### 52 **Calculation of sample size**

53  
54 A rough approximation of the requested sample size targeted at rumination as one of the primary  
55 outcomes can be achieved by referring to a previous study.[63] This study investigated the effects of a  
56 task-based cognitive control training compared to treatment as usual in adult MD. The training aimed at  
57 improving ER skills indirectly by targeting mechanisms thought to underlie ER. This study reported a  
58  
59  
60

1  
2  
3 large effect size in the training group from pre to post (Cohen's  $d=1.42$ ) on a measure related to negative  
4 affect (rumination). Based on a conservative assumption, a large effect size of  $d=0.85$  is expected with  
5 regard to changes in rumination for the CR training from pre to post. For the control training, a small  
6 effect size ( $d=0.2$ ) is expected from pre to post due to unspecific "positive" effects of the control  
7 intervention. This effect size is based on prior evidence<sup>4</sup> on the effects of a similar control training in  
8 young adults.[30]

9  
10  
11 Based on these assumptions, calculation of the required sample size to detect a significant 2(group) x  
12 2(time: T0=pre, T4=post) interaction for rumination using a repeated measures ANOVA with a 5% level  
13 of significance ( $\alpha=0.05$ ) and 80% statistical power ( $1-\beta=0.80$ ) revealed an  $N=47$  for the total  
14 group (assuming a 0.7 pre-post correlation). The drop-out rate for the study is estimated at approx. 33%.  
15 Thus,  $n=35$  adolescents will be enrolled in each group. The necessary sample size was calculated with  
16 G\*power 3.1. Statistical power of analyses that involve more measurements, such as the analysis of  
17 affect, will have more than 80% statistical power if effect sizes are similar.  
18  
19  
20  
21  
22  
23  
24  
25  
26  
27  
28  
29  
30  
31  
32

### 33 **Statistical analysis**

34 To test the hypotheses that the CR training results in a stronger decrease in depressive  
35 symptoms/rumination from baseline to post-training assessment compared to a control training, a mixed-  
36 model ANOVA with the factors group (CR vs. control training) and time (T0, T4) will be conducted for  
37 the BDI-II and the two RSQ-D scales "self-focused rumination", "symptom-focused rumination". To  
38 account for the fact that the RSQ-D will be reassessed at follow-up, a mixed-model ANOVA with the  
39 factors group (CR vs. control training) and time (T0, T4, follow-up) will additionally be conducted for  
40 the two rumination scales. Mixed modeling has the advantage over regular repeated measures ANOVA  
41 that all available data can be used, including data from incomplete cases, without using imputation  
42 techniques for missing data. To test the hypotheses that the CR training results in a a) stronger decrease  
43 in negative and b) stronger increase in positive affect from pre- to post-training and follow-up  
44 assessment compared to the control training, mixed-model ANOVAs with the factors group (CR vs.  
45  
46  
47  
48  
49  
50  
51  
52  
53  
54  
55  
56  
57  
58  
59

---

60 <sup>4</sup> Detailed statistical information was derived from personal communication with corresponding author of this study; B. Denny, April 26th, 2017.



control training) and time (T1, T2, T3, T4, follow-up) will be conducted for the Negative Affect/ Positive Affect scale of the PANAS-C-SF. The same statistical model procedure will be applied for perceived stress (PSS-10).

To test the hypothesis that over the course of the CR training, MD adolescents show an increased downregulation of the early and late LPP amplitude via CR, a mixed-model ANOVA with the factors 2(condition: negative-reappraise, negative-attend) x 4(training session: T1, T2, T3, T4) will be conducted separately for early and late LPP time windows. The same statistical procedure will be conducted for the affective ratings of negative pictures and the percent of gaze fixation duration in emotional areas of negative pictures. Correlation analyses will be performed between the percent of gaze fixation duration in emotional areas of negative pictures and ER success (downregulation of the LPP and affective ratings of negative pictures via CR).

To examine changes of the LPP, affective ratings of negative pictures and gaze fixations for the negative-attend condition in the control training group over the course of the training, additional exploratory ANOVAs will be conducted. Likewise, for the control training group, exploratory correlation analyses will be calculated to examine relationships between these measures and gaze fixation duration in emotional areas of negative pictures. Finally, moderation and mediation analyses will be applied to examine the role of mediating and moderating variables.

### **Patient and public involvement**

Participants or their parents were not involved in designing the study. However, we will present the results of the study to parent and participant representatives to include their suggestions in the dissemination plan. Moreover, parallel to publication of the results, all participants and their families will receive a letter summarizing the main findings and conclusions in comprehensible language.

### **Discussion**

This study will for the first time elucidate whether in adolescents with MD, a CR training shows beneficial effects both in and outside the laboratory. If the training proves effective, this approach might be a promising resource-effective intervention for adolescents with MD. Such an intervention could,

1  
2  
3 e.g., be applied to bridge the often long waiting times for treatment of MD or as an adjunction to a  
4 treatment as usual. Moreover, after psychoeducation on CR and guided practice of this strategy in  
5 psychotherapy, the training could also be (online) applied as an adjunct to treatment as usual. In such a  
6 context, the psychotherapist could monitor difficulties and progress in the use of CR, and promote the  
7 transfer of strategy into everyday life of the patient.  
8  
9

10  
11  
12  
13 Building on the results from the present RCT, future investigations could additionally consider transfer  
14 effects to CR tasks other than the training tasks or to CR abilities in daily life e.g., based on ecological  
15 momentary assessment. Moreover, as a next step, it would be worthwhile to assess whether this training  
16 might prove effective in patients with other psychiatric disorders which are also characterized by  
17 deficient ER abilities, such as anxiety disorders and eating disorders.[64]  
18  
19

20  
21  
22 The results of our study will be an important step towards larger scale, multi-center RCTs in MD  
23 adolescents to investigate whether a CR training increases the efficacy of standard treatments.  
24 Furthermore, the study will elucidate neurobiological changes that occur during training and whether  
25 these are linked to changes in training outcome. To this end, our protocol may also aid to identify  
26 potential biomarkers for monitoring and predicting treatment success and thereby spark further research  
27 into the direction of individualized treatment adaptation based on neurobiological parameters.  
28  
29  
30  
31  
32  
33  
34  
35  
36  
37  
38  
39  
40  
41  
42  
43  
44  
45  
46  
47  
48  
49  
50  
51  
52  
53  
54  
55  
56  
57  
58  
59  
60

### Abbreviations

BAPS-Ado: Besançon Affective Picture Set-Adolescents; BAPS-Adult: Besançon Affective Picture Set-Adults; BDI-II: Beck depression inventory; CBCL 6-18R: Child Behavior Checklist for the ages 6-18; CFT-20-R (revidierte Grundintelligenztest Skala 2): Culture fair intelligence test; CBT: Cognitive-behavioral therapy; CR: Cognitive reappraisal; DFG (Deutsche Forschungsgemeinschaft): German Research Foundation; FEEL-KJ (Fragebogen zur Erhebung der Emotionsregulation bei Kindern und Jugendlichen): Questionnaire for the assessment of emotion regulation in children and adolescents; IAPS: International Affective Picture System; ICD-10: International Statistical Classification of Diseases and Related Health Problems 10<sup>th</sup> Revision; IQ: Intelligence Quotient; Kinder-DIPS (Diagnostisches Interview bei psychischen Störungen im Kindes- und Jugendalter): Diagnostic interview for psychiatric disorders for children and adolescents; LMU: Ludwig-Maximilians University; LPP: Late Positive Potential; MD: Major depression; PANAS-C-SF: Negative Affect Scale and Positive Affect Scale for Children Shortened Version for Children Shortened Version; PSS-10: Perceived Stress Scale 10; RSQ-D: German Version of the Response Styles Questionnaire; SAM: self-assessment manikin rating scale; SES-17: Social Desirability Scale; SPIRIT: Standard protocol items: recommendations for interventional trials; STAI: State-Trait-Anxiety Inventory; TAP (Testbatterie zur Aufmerksamkeitsprüfung): Test battery for executive functions; WISC-V: Wechsler Intelligence Scale for Children - Fifth Edition.

### Declarations

#### Ethics approval

Written informed consent/assent will be taken by the participating adolescents and their parents/legal custodians. The study protocol and the template informed consent/assent forms were approved (including two amendments) by the institutional review board of the local ethics committee (Ludwig-Maximilians-University Medical Division Ethics Committee, Munich, Germany; study ID: 63-16) on 30<sup>th</sup> January 2019.

#### Consent for publication

This manuscript does not contain any form of individual person's data, all data will be reported based on aggregated group data.

#### Availability of data and material

The datasets generated and/or analyzed during the current study are not publicly available due to sensitive patient information, such as sociodemographic information, birth date and comorbidities, but aggregated group data can be made available upon request.

#### Competing interests statement

The authors declare that they have no competing financial or non-financial interests.

#### Funding

This work was supported by the Deutsche Forschungsgemeinschaft (DFG, German Research Foundation) – Grant GR4753/2-1 to E.G. The funding body played no role in the design of the study or writing of the manuscript or the decision to submit the report for publication.

#### Authors' contributions

EG, LF, GSK and CP contributed to the study design. Data management will be conducted by LF and EG and data analysis and interpretation will be performed by LF, EG, FO, GSK, JB, MSR and CP. EG

1  
2  
3 and LF wrote the study protocol. All authors read and critically revised the draft of the paper and  
4 approved the final version of this manuscript.  
5

### 6 7 **Acknowledgements**

8 We are grateful to Carolin Zsigo for the assistance during the implementation of the experiment. We  
9 wish to thank Petra Wagenbüchler for her assistance in data collection. We further would like to thank  
10 Dr. Lauriane Vulliez and Dr. Monika Szymanska for providing BAPS-Ado and BAPS-Adult picture  
11 sets.  
12

### 13 14 **Trial Sponsor**

15 Department of Child and Adolescent Psychiatry, Psychosomatics and Psychotherapy, University  
16 Hospital, LMU Munich (Primary Sponsor)  
17 Nussbaumstraße 5a  
18 80336 Munich  
19 Germany  
20 Contact Name: PD Dr. Ellen Greimel (Principal Investigator & Contact for Public/Scientific Queries)  
21 Phone: +49 89 4400 56952  
22 Email: ellen.greimel@med.uni-muenchen.de  
23  
24  
25  
26  
27  
28  
29  
30  
31  
32  
33  
34  
35  
36  
37  
38  
39  
40  
41  
42  
43  
44  
45  
46  
47  
48  
49  
50  
51  
52  
53  
54  
55  
56  
57  
58  
59  
60

## References

- 1 Kessler RC, Bromet EJ. The epidemiology of depression across cultures. *Annu Rev Publ Health* 2013;34:119-38.
- 2 Avenevoli S, Knight E, Kessler RC, et al. Epidemiology of depression in children and adolescents. In: Abela JRZ, Hankin BL, editors. *Handbook of depression in children and adolescents*. New York: Guilford; 2008. p. 6-32.
- 3 Kovacs M, Yaroslavsky I. Practitioner review: Dysphoria and its regulation in child and adolescent depression. *J Child Psychol Psychiatry* 2014;55(7):741-57.
- 4 Ochsner KN, Gross JJ. The cognitive control of emotion. *Trends Cogn Sci* 2005;9(5):242-9.
- 5 Ahmed SP, Bittencourt-Hewitt A, Sebastian CL. Neurocognitive bases of emotion regulation development in adolescence. *Dev Cogn Neurosci* 2015;15:11-25.
- 6 Compton SN, March JS, Brent D, et al. Cognitive-behavioral psychotherapy for anxiety and depressive disorders in children and adolescents: an evidence-based medicine review. *J Am Acad Child Psy* 2004;43(8):930-59.
- 7 Curry J, Rohde P, Simons A, et al. Predictors and moderators of acute outcome in the Treatment for Adolescents with Depression Study (TADS). *J Am Acad Child Psy* 2006;45(12):1427-39.
- 8 Thapar A, Collishaw S, Pine DS, et al. Depression in adolescence. *Lancet* 2012;379(9820):1056-67.
- 9 Berking M, Ebert D, Cuijpers P, et al. Emotion regulation skills training enhances the efficacy of inpatient cognitive behavioral therapy for major depressive disorder: a randomized controlled trial. *Psychother Psychosom* 2013;82:234-45.
- 10 Berking M, Wupperman P, Reichardt A, et al. Emotion-regulation skills as a treatment target in psychotherapy. *Behav Res Ther* 2008;46:1230-7.
- 11 Cutuli D. Cognitive reappraisal and expressive suppression strategies role in the emotion regulation: an overview on their modulatory effects and neural correlates. *Front Syst Neurosci* 2014;8:175.
- 12 Garnefski N, Kraaij V. The cognitive emotion regulation questionnaire: Psychometric Features and Prospective Relationships with Depression and Anxiety in Adults. *Eur J Psychol Assess* 2007;23(3):141-9.
- 13 Joormann J, Gotlib IH. Emotion regulation in depression: relation to cognitive inhibition. *Cognition Emotion* 2010;24(2):281-98.
- 14 Schäfer JÖ, Naumann E, Holmes EA, et al. Emotion regulation strategies in depressive and anxiety symptoms in youth: A meta-analytic review. *J Youth Adolescence* 2017;46(2):261-76.
- 15 Dillon DG, Pizzagalli DA. Evidence of successful modulation of brain activation and subjective experience during reappraisal of negative emotion in unmedicated depression. *Psychiatry Res Neuroimaging* 2013;212(2):99-107.
- 16 Sheline YI, Barch DM, Price JL, et al. The default mode network and self-referential processes in depression. *P Natl Acad Sci* 2009;106(6):1942-7.
- 17 Greening SG, Osuch EA, Williamson PC, et al. The neural correlates of regulating positive and negative emotions in medication-free major depression. *SCAN* 2013;9(5):628-37.
- 18 Zilverstand A, Parvaz MA, Goldstein RZ. Neuroimaging cognitive reappraisal in clinical populations to define neural targets for enhancing emotion regulation. A systematic review. *Neuroimage* 2017;151:105-16.
- 19 Greimel E, Schulte-Ruether M, Fink GR, et al. Development of neural correlates of empathy from childhood to early adulthood: an fMRI study in boys and adult men. *J Neural Transm* 2010;117(6):781-91.
- 20 DeCicco JM, O'Toole LJ, Dennis TA. The late positive potential as a neural signature for cognitive reappraisal in children. *Dev Neuropsychol* 2014;39(7):497-515.
- 21 Moser JS, Kropfing JW, Dietz J, et al. Electrophysiological correlates of decreasing and increasing emotional responses to unpleasant pictures. *Psychophysiology* 2009;46:17-27.
- 22 Paul S, Simon D, Kniesche R, et al. Timing effects of antecedent-and response-focused emotion regulation strategies. *Biol Psychol* 2013;94(1):136-42.
- 23 Dennis TA, Hajcak G. The late positive potential: a neurophysiological marker for emotion regulation in children. *J Child Psychol Psyc* 2009;50(11):1373-83.

- 1  
2  
3 24 Wessing I, Rehbein MA, Romer G, et al. Cognitive emotion regulation in children: reappraisal of  
4 emotional faces modulates neural source activity in a frontoparietal network. *Dev Cogn Neurosci*  
5 2015;13:1-10.
- 6 25 Bylsma LM. Emotional Reactivity and Regulation in Current and Remitted Depression: An Event  
7 Related Potential Study [Dissertation]: University of South Florida; 2012.
- 8 26 Kudinova AY, Owens M, Burkhouse KL, et al. Differences in emotion modulation using cognitive  
9 reappraisal in individuals with and without suicidal ideation: An ERP study. *Cognition Emotion*  
10 2016;30(5):999-1007.
- 11 27 Bebko GM, Franconeri SL, Ochsner KN, et al. Attentional deployment is not necessary for  
12 successful emotion regulation via cognitive reappraisal or expressive suppression. *Emotion*  
13 2014;14(3):504-12.
- 14 28 Manera V, Samson AC, Pehrs C, et al. The eyes have it: The role of attention in cognitive  
15 reappraisal of social stimuli. *Emotion* 2014;14(5):833-9.
- 16 29 Strauss GP, Ossenfort KL, Whearty KM. Reappraisal and distraction emotion regulation strategies  
17 are associated with distinct patterns of visual attention and differing levels of cognitive demand.  
18 *Plos One* 2016;11(11):e0162290.
- 19 30 Denny BT, Ochsner KN. Behavioral effects of longitudinal training in cognitive reappraisal.  
20 *Emotion* 2014;14(2):425-33.
- 21 31 De Witte NA, Sütterlin S, Braet C, et al. Psychophysiological correlates of emotion regulation  
22 training in adolescent anxiety: Evidence from the novel PIER task. *J Affect Disord* 2017;214:89-96.
- 23 32 World Health Organization. The ICD-10 classification of mental and behavioural disorders: clinical  
24 descriptions and diagnostic guidelines: Geneva: World Health Organization; 1992.
- 25 33 Schönfelder S, Kanske P, Heissler J, et al. Time course of emotion-related responding during  
26 distraction and reappraisal. *SCAN* 2014;9(9):1310-9.
- 27 34 Paul S, Simon D, Endrass T, et al. Altered emotion regulation in obsessive-compulsive disorder as  
28 evidenced by the late positive potential. *Psychol Med* 2016;46(1):137-47.
- 29 35 Sarlo M, Ubel S, Leutgeb V, et al. Cognitive reappraisal fails when attempting to reduce the  
30 appetitive value of food: an ERP study. *Biol Psychol* 2013;94(3):507-12.
- 31 36 Bradley MM, Lang PJ. Measuring emotion: the self-assessment manikin and the semantic  
32 differential. *J Behav Ther Exp Psy* 1994;25(1):49-59.
- 33 37 Suk H-J. Color and Emotion-a study on the affective judgment across media and in relation to  
34 visual stimuli [Dissertation]: Universität Mannheim; 2006.
- 35 38 Lang PJ. Behavioral treatment and bio-behavioral assessment: Computer applications. In: Sidowski  
36 JB, Johnson JH, Williams TA, editors. Technology in mental health care delivery systems.  
37 Norwood, NJ: Ablex; 1980. p. 119-37.
- 38 39 Patrick CJ, Lavoro SA. Ratings of emotional response to pictorial stimuli: Positive and negative  
39 affect dimensions. *Motiv Emotion* 1997;21(4):297-321.
- 40 40 Lang PJ, Bradley MM, Cuthbert BN. International affective picture system (IAPS): Affective  
41 ratings of pictures and instruction manual. Technical Report A-8. Gainesville, FL: University of  
42 Florida; 2008.
- 43 41 Szymanska M, Monnin J, Noiret N, et al. The Besançon affective picture set-adolescents (the  
44 BAPS-Ado): development and validation. *Psychiatry Res* 2015;228(3):576-84.
- 45 42 Szymanska M, Comte A, Tio G, et al. The Besançon affective picture set-adult (BAPS-Adult):  
46 Development and validation. *Psychiatry Res* 2019;271:31-8.
- 47 43 Margraf J, Cwik JC, Pflug V, et al. Structured clinical interviews for mental disorders across the  
48 lifespan: Psychometric quality and further developments of the DIPS Open Access interviews.  
49 [Strukturierte klinische Interviews zur Erfassung psychischer Störungen über die Lebensspanne:  
50 Gütekriterien und Weiterentwicklungen der DIPS-Verfahren.]. *Z Klin Psychol Psychopathol*  
51 *Psychother* 2017;46(3):176-86.
- 52 44 Margraf J, Cwik JC, Suppiger A, et al. DIPS Open Access: Diagnostic Interview for Mental  
53 Disorders. [DIPS Open Access: Diagnostisches Interview bei psychischen Störungen.] Bochum:  
54 Mental Health Research and Treatment Center; 2017.
- 55 45 Weiß RH. CFT 20-R, Grundintelligenztest Skala 2 - Revision (2. Auflage)2019.
- 56 46 Wechsler D. Wechsler Intelligence Scale for Children—Fifth Edition (WISC-V). Frankfurt/Main,  
57 Nürnberg, Leipzig: Pearson; 2017.



- 1  
2  
3 47 Kühner C, Huffziger S, Nolen-Hoeksema S. Response Styles Questionnaire-Deutsche Version:  
4 RSQ-D; Manual: Hogrefe; 2007.
- 5 48 Hautzinger M, Keller F, Kühner C. Das Beck Depressionsinventar II. Deutsche Bearbeitung und  
6 Handbuch zum BDI-II. Frankfurt am Main: Harcourt Test Services; 2006.
- 7 49 Cohen S, Kamarck T, Mermelstein R. A global measure of perceived stress. *J Health Soc Behav*  
8 1983;24(4):385-96.
- 9 50 Ebesutani C, Regan J, Smith A, et al. The 10-Item Positive and Negative Affect Schedule for  
10 Children, Child and Parent Shortened Versions: Application of Item Response Theory for More  
11 Efficient Assessment. *J Psychopathol Behav* 2012;34(2):191-203.
- 12 51 Stöber J. Die Soziale-Erwünschtheits-Skala-17 (SES-17): Entwicklung und erste Befunde zu  
13 Reliabilität und Validität. *Diagnostica* 1999;45(4):173-7.
- 14 52 Koster EH, De Lissnyder E, Derakshan N, et al. Understanding depressive rumination from a  
15 cognitive science perspective: The impaired disengagement hypothesis. *Clin Psychol Rev*  
16 2011;31(1):138-45.
- 17 53 Sanchez-Lopez A, Everaert J, Van Put J, et al. Eye-gaze contingent attention training (ECAT):  
18 Examining the causal role of attention regulation in reappraisal and rumination. *Biol Psychol*  
19 2019;142:116-25.
- 20 54 Cohen N, Ochsner KN. From surviving to thriving in the face of threats: the emerging science of  
21 emotion regulation training. *Curr Opin Behav Sci* 2018;24:143-55.
- 22 55 Miyake A, Friedman NP, Emerson MJ, et al. The unity and diversity of executive functions and  
23 their contributions to complex “frontal lobe” tasks: A latent variable analysis. *Cognitive Psychol*  
24 2000;41(1):49-100.
- 25 56 Friedman NP, Miyake A, Young SE, et al. Individual differences in executive functions are almost  
26 entirely genetic in origin. *J Exp Psychol Gen* 2008;137(2):201-25.
- 27 57 Zimmermann P, Fimm B. TAP Testbatterie zur Aufmerksamkeitsprüfung Version 2.3: Vera Fimm,  
28 Psychologische Testsysteme; 2012.
- 29 58 Grob A, Smolenski C. Fragebogen zur Erhebung der Emotionsregulation bei Kindern und  
30 Jugendlichen (FEEL-KJ). 2. Aktualisierte und ergänzte Auflage. Bern: Huber Verlag; 2009.
- 31 59 Axelson DA, Birmaher B. Relation between anxiety and depressive disorders in childhood and  
32 adolescence. *Depress Anxiety* 2001;14(2):67-78.
- 33 60 Laux L, Glanzmann P, Schaffner P, et al. Das State-Trait-Angstinventar Weinheim, Germany:  
34 Beltz; 1981.
- 35 61 Döpfner M, Achenbach TM, Plück J, et al. CBCL/6-18R-TRF/6-18R-YSR/11-18R: Deutsche  
36 Schulalter-Formen der Child Behavior Checklist von Thomas M. Achenbach: Elternfragebogen  
37 über das Verhalten von Kindern und Jugendlichen (CBCL/6-18R), Lehrerfragebogen über das  
38 Verhalten von Kindern und Jugendlichen (TRF/6-18R), Fragebogen für Jugendliche (YSR/11-  
39 18R). Göttingen: Hogrefe; 2014.
- 40 62 Moran TP, Jendrusina AA, Moser JS. The psychometric properties of the late positive potential  
41 during emotion processing and regulation. *Brain Res* 2013;1516:66-75.
- 42 63 Siegle GJ, Price RB, Jones NP, et al. You gotta work at it: Pupillary indices of task focus are  
43 prognostic for response to a neurocognitive intervention for rumination in depression. *Clin Psychol*  
44 *Sci* 2014;2(4):455-71.
- 45 64 Aldao A, Nolen-Hoeksema S, Schweizer S. Emotion-regulation strategies across psychopathology:  
46 A meta-analytic review. *Clin Psychol Rev* 2010;30(2):217-37.
- 47  
48  
49  
50  
51  
52  
53  
54  
55  
56  
57  
58  
59  
60

**Table 1.** Overview over diagnostic measures and all variables of the study

| Function                     | Measure                                       | Instrument                                      | Reliability                                                                                                                             | T0 Baseline/<br>Diagnostics | T1 | T2 | T3 | T4 | 2-week Follow-up |
|------------------------------|-----------------------------------------------|-------------------------------------------------|-----------------------------------------------------------------------------------------------------------------------------------------|-----------------------------|----|----|----|----|------------------|
| <b>Diagnostic</b>            | Diagnosis                                     | Kinder-DIPS (A)                                 | Retest-Reliability for depressive disorders=.95 (Kappa) for the predecessor version of the Kinder-Dips for DSM-IV diagnoses             | X                           |    |    |    |    |                  |
|                              | Intelligence quotient (IQ)                    | CFT-20-R (A) (part 1)                           | Cronbach's $\alpha$ =.92 for the first part                                                                                             | X                           |    |    |    |    |                  |
| <b>Primary Outcome</b>       | Depressive Symptoms                           | BDI-II (A)                                      | Cronbach's $\alpha$ =.94 in adolescent population [72]                                                                                  | X                           |    |    |    | X  |                  |
|                              | Negative and positive Affect                  | PANAS-C-SF (A)                                  | Cronbach's $\alpha$ =.86 for positive affect scale and Cronbach's $\alpha$ =.82 for negative affect scale [53]                          |                             | X  | X  | X  | X  | X                |
|                              | Perceived Stress                              | PSS-10 (A)                                      | Cronbach's $\alpha$ =.84                                                                                                                |                             | X  | X  | X  | X  | X                |
|                              | Rumination                                    | RSQ-D (A)                                       | Cronbach's $\alpha$ =.77 for self-focused rumination scale and Cronbach's $\alpha$ =.88 for symptom-focused rumination in patients [56] | X                           |    |    |    | X  | X                |
| <b>Secondary Outcome</b>     | Affective behavioral responses to pictures    | SAM Rating Scale (A)                            |                                                                                                                                         |                             | X  | X  | X  | X  |                  |
|                              | LPP (Late Positive Potential)                 | (A)                                             |                                                                                                                                         |                             | X  | X  | X  | X  |                  |
|                              | Gaze fixations in emotional areas of interest | (A)                                             |                                                                                                                                         |                             | X  | X  | X  | X  |                  |
| <b>Confounding Variables</b> | Social Desirability                           | SES-17 (A)                                      | Cronbach's $\alpha$ =.72[57, 73]                                                                                                        | X                           |    |    |    |    |                  |
| <b>Mediators</b>             | State rumination during training              | Questionnaire (A) applied in A Sanchez-Lopez, J |                                                                                                                                         |                             | X  | X  | X  | X  |                  |



|                   |                                                                         |                                                     |                                                                                                                                                                  |   |  |  |  |  |  |
|-------------------|-------------------------------------------------------------------------|-----------------------------------------------------|------------------------------------------------------------------------------------------------------------------------------------------------------------------|---|--|--|--|--|--|
|                   |                                                                         | Everaert, J Van Put, R De Raedt and EHW Koster [59] |                                                                                                                                                                  |   |  |  |  |  |  |
|                   | Habitual emotion regulation strategies                                  | FEEL-KJ (A)                                         | Cronbach’s $\alpha=.93$ for Adaptive emotion regulation scale and Cronbach’s $\alpha=.82$ for Maladaptive emotion regulation scale [64]                          | X |  |  |  |  |  |
|                   | Executive Function abilities (Set shifting, Working Memory, Inhibition) | TAP 2.3 (A)                                         | Odd–even– Reliability for reaction times in adolescents: .791 for working memory, .952 for flexibility, .911 for Go/nogo for trials applied in the current study | X |  |  |  |  |  |
| <b>Moderators</b> | Trait and state anxiety                                                 | STAI (A)                                            | Cronbach’s $\alpha=.91$ for STAI-S scale and Cronbach’s $\alpha\geq.89$ for STAI-T scale in adolescents/young adults [66]                                        | X |  |  |  |  |  |
|                   | Psychopathology                                                         | CBCL 6-18R (P)                                      | Cronbach’s $\alpha=.93$ for total behavior problem scale [67]                                                                                                    | X |  |  |  |  |  |

**Note.** Applied to A=Adolescent P=Parent; Abbreviations: Kinder-DIPS (Diagnostisches Interview bei psychischen Störungen im Kindes- und Jugendalter): Diagnostic interview for psychiatric disorders for children and adolescents; CFT-20-R (revidierte Grundintelligenztest Skala 2): Culture fair intelligence test; BDI-II: Beck depression inventory; PANAS-C-SF: Negative Affect Scale and Positive Affect Scale for Children Shortened Version for Children Shortened Version; PSS-10: Perceived Stress Scale 10; RSQ-D: German Version of the Response Styles Questionnaire; SAM: self-assessment manikin rating scale; SES-17: Social Desirability Scale; FEEL-KJ (Fragebogen zur Erhebung der Emotionsregulation bei Kindern und Jugendlichen): Questionnaire for the assessment of emotion regulation in children and adolescents; TAP (Testbatterie zur Aufmerksamkeitsprüfung): Test battery for executive functions; STAI: State-Trait-Anxiety Inventory; CBCL 6-18R: Child Behavior Checklist for the ages 6-18.

## Figure Legends

**Figure 1.** Overview of the KONNI study design

**Figure 2.** Experimental time course. Exemplary illustration of a trial belonging to the CR training (negative-reappraise condition). The picture shown is exemplary and not part of the picture databases used in the study. Abbreviations: SAM: self-assessment manikin rating scale (as a portrait version; see Suk, 2006).

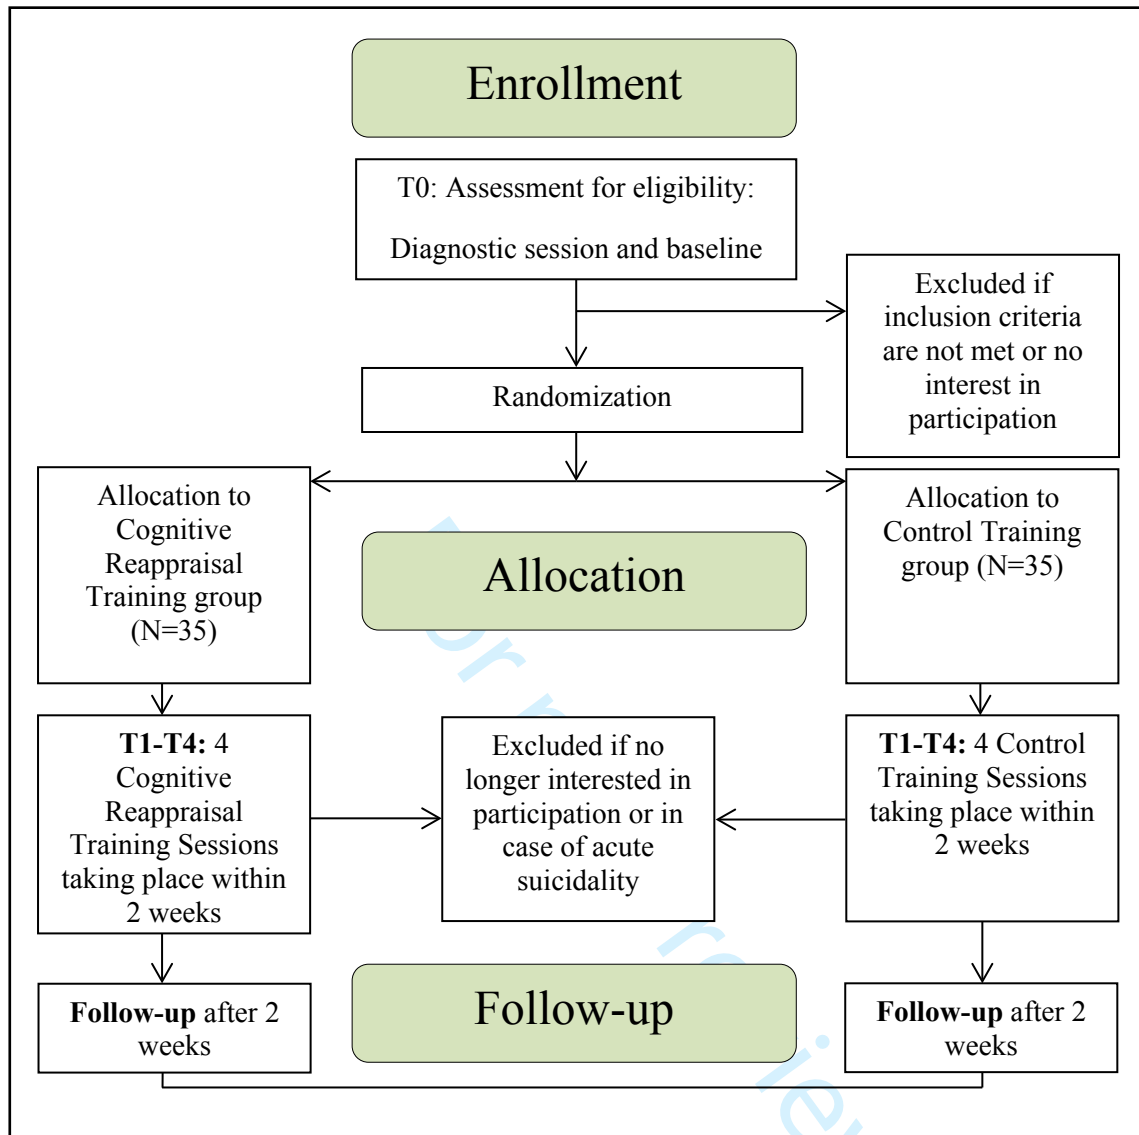

38 **Figure 1.** Overview of the KONNI study design

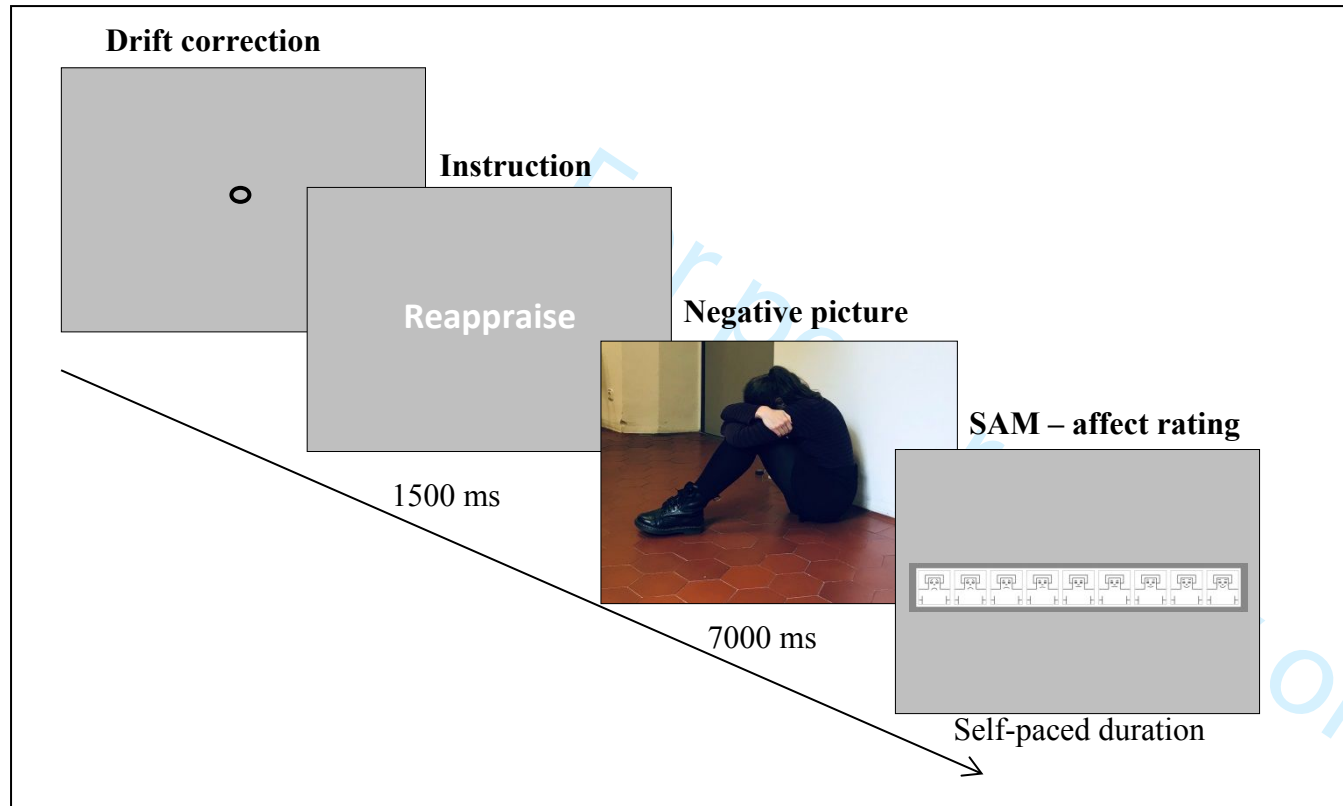

**Fig. 2.** Experimental time course. Exemplary illustration of a trial belonging to the CR training (negative-reappraise condition). The picture shown is exemplary and not part of the picture databases used in the study. Abbreviations: SAM: self-assessment manikin rating scale (as a portrait version; see Suk, 2006).

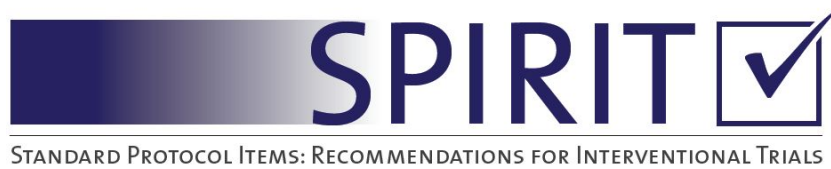

SPIRIT 2013 Checklist: Recommended items to address in a clinical trial protocol and related documents\*

| Section/item                      | Item No | Description                                                                                                                                                                                                                                                                                                                                                    |
|-----------------------------------|---------|----------------------------------------------------------------------------------------------------------------------------------------------------------------------------------------------------------------------------------------------------------------------------------------------------------------------------------------------------------------|
| <b>Administrative information</b> |         |                                                                                                                                                                                                                                                                                                                                                                |
| Title                             | 1       | Descriptive title identifying the study design, population, interventions, and, if applicable, trial acronym ( <b>p. 1 Title</b> )                                                                                                                                                                                                                             |
| Trial registration                | 2a      | Trial identifier and registry name. If not yet registered, name of intended registry ( <b>p. 2 “Trial Registration”</b> )                                                                                                                                                                                                                                      |
|                                   | 2b      | All items from the World Health Organization Trial Registration Data Set ( <b>throughout the entire study protocol</b> )                                                                                                                                                                                                                                       |
| Protocol version                  | 3       | Date and version identifier ( <b>n.a., first version of the protocol</b> )                                                                                                                                                                                                                                                                                     |
| Funding                           | 4       | Sources and types of financial, material, and other support ( <b>p. 16, section “funding”</b> )                                                                                                                                                                                                                                                                |
| Roles and responsibilities        | 5a      | Names, affiliations, and roles of protocol contributors ( <b>pp. 16-17, section “author’s contributions”</b> )                                                                                                                                                                                                                                                 |
|                                   | 5b      | Name and contact information for the trial sponsor ( <b>p. 17, section “trial sponsor”</b> )                                                                                                                                                                                                                                                                   |
|                                   | 5c      | Role of study sponsor and funders, if any, in study design; collection, management, analysis, and interpretation of data; writing of the report; and the decision to submit the report for publication, including whether they will have ultimate authority over any of these activities ( <b>p. 16, section “funding”</b> )                                   |
|                                   | 5d      | Composition, roles, and responsibilities of the coordinating centre, steering committee, endpoint adjudication committee, data management team, and other individuals or groups overseeing the trial, if applicable (see Item 21a for data monitoring committee) ( <b>n.a.</b> )                                                                               |
| <b>Introduction</b>               |         |                                                                                                                                                                                                                                                                                                                                                                |
| Background and rationale          | 6a      | Description of research question and justification for undertaking the trial, including summary of relevant studies (published and unpublished) examining benefits and harms for each intervention ( <b>pp. 3-5; sections: “Introduction”, “Cognitive reappraisal in depressed individuals”, “Trainability of cognitive reappraisal”, “Aim of the study”</b> ) |

|    |                                                           |     |                                                                                                                                                                                                                                                                                                                                                                                                                                                       |
|----|-----------------------------------------------------------|-----|-------------------------------------------------------------------------------------------------------------------------------------------------------------------------------------------------------------------------------------------------------------------------------------------------------------------------------------------------------------------------------------------------------------------------------------------------------|
| 1  |                                                           | 6b  | Explanation for choice of comparators ( <b>pp. 8-9, section “Control training”</b> )                                                                                                                                                                                                                                                                                                                                                                  |
| 2  |                                                           |     |                                                                                                                                                                                                                                                                                                                                                                                                                                                       |
| 3  |                                                           |     |                                                                                                                                                                                                                                                                                                                                                                                                                                                       |
| 4  |                                                           |     |                                                                                                                                                                                                                                                                                                                                                                                                                                                       |
| 5  | Objectives                                                | 7   | Specific objectives or hypotheses ( <b>pp. 4-5, section “Aim of the study”</b> )                                                                                                                                                                                                                                                                                                                                                                      |
| 6  |                                                           |     |                                                                                                                                                                                                                                                                                                                                                                                                                                                       |
| 7  |                                                           |     |                                                                                                                                                                                                                                                                                                                                                                                                                                                       |
| 8  | Trial design                                              | 8   | Description of trial design including type of trial (eg, parallel group, crossover, factorial, single group), allocation ratio, and framework (eg, superiority, equivalence, noninferiority, exploratory) ( <b>pp. 5-6, section “Design”</b> )                                                                                                                                                                                                        |
| 9  |                                                           |     |                                                                                                                                                                                                                                                                                                                                                                                                                                                       |
| 10 |                                                           |     |                                                                                                                                                                                                                                                                                                                                                                                                                                                       |
| 11 |                                                           |     |                                                                                                                                                                                                                                                                                                                                                                                                                                                       |
| 12 |                                                           |     |                                                                                                                                                                                                                                                                                                                                                                                                                                                       |
| 13 |                                                           |     |                                                                                                                                                                                                                                                                                                                                                                                                                                                       |
| 14 | <b>Methods: Participants, interventions, and outcomes</b> |     |                                                                                                                                                                                                                                                                                                                                                                                                                                                       |
| 15 |                                                           |     |                                                                                                                                                                                                                                                                                                                                                                                                                                                       |
| 16 | Study setting                                             | 9   | Description of study settings (eg, community clinic, academic hospital) and list of countries where data will be collected. Reference to where list of study sites can be obtained ( <b>p. 6, section “Recruitment”</b> )                                                                                                                                                                                                                             |
| 17 |                                                           |     |                                                                                                                                                                                                                                                                                                                                                                                                                                                       |
| 18 |                                                           |     |                                                                                                                                                                                                                                                                                                                                                                                                                                                       |
| 19 |                                                           |     |                                                                                                                                                                                                                                                                                                                                                                                                                                                       |
| 20 |                                                           |     |                                                                                                                                                                                                                                                                                                                                                                                                                                                       |
| 21 | Eligibility criteria                                      | 10  | Inclusion and exclusion criteria for participants. If applicable, eligibility criteria for study centres and individuals who will perform the interventions (eg, surgeons, psychotherapists) ( <b>pp. 6-7, sections “Participants”, “Procedure”</b> )                                                                                                                                                                                                 |
| 22 |                                                           |     |                                                                                                                                                                                                                                                                                                                                                                                                                                                       |
| 23 |                                                           |     |                                                                                                                                                                                                                                                                                                                                                                                                                                                       |
| 24 |                                                           |     |                                                                                                                                                                                                                                                                                                                                                                                                                                                       |
| 25 |                                                           |     |                                                                                                                                                                                                                                                                                                                                                                                                                                                       |
| 26 | Interventions                                             | 11a | Interventions for each group with sufficient detail to allow replication, including how and when they will be administered ( <b>pp. 7-9, sections “Cognitive Reappraisal Training”, “Control Training”</b> )                                                                                                                                                                                                                                          |
| 27 |                                                           |     |                                                                                                                                                                                                                                                                                                                                                                                                                                                       |
| 28 |                                                           |     |                                                                                                                                                                                                                                                                                                                                                                                                                                                       |
| 29 |                                                           |     |                                                                                                                                                                                                                                                                                                                                                                                                                                                       |
| 30 |                                                           |     |                                                                                                                                                                                                                                                                                                                                                                                                                                                       |
| 31 |                                                           | 11b | Criteria for discontinuing or modifying allocated interventions for a given trial participant (eg, drug dose change in response to harms, participant request, or improving/worsening disease) ( <b>p. 7, section “Procedure”; Fig. 1</b> )                                                                                                                                                                                                           |
| 32 |                                                           |     |                                                                                                                                                                                                                                                                                                                                                                                                                                                       |
| 33 |                                                           |     |                                                                                                                                                                                                                                                                                                                                                                                                                                                       |
| 34 |                                                           |     |                                                                                                                                                                                                                                                                                                                                                                                                                                                       |
| 35 |                                                           |     |                                                                                                                                                                                                                                                                                                                                                                                                                                                       |
| 36 |                                                           |     |                                                                                                                                                                                                                                                                                                                                                                                                                                                       |
| 37 |                                                           | 11c | Strategies to improve adherence to intervention protocols, and any procedures for monitoring adherence (eg, drug tablet return, laboratory tests) ( <b>p. 8, section “Cognitive Reappraisal Training”</b> )                                                                                                                                                                                                                                           |
| 38 |                                                           |     |                                                                                                                                                                                                                                                                                                                                                                                                                                                       |
| 39 |                                                           |     |                                                                                                                                                                                                                                                                                                                                                                                                                                                       |
| 40 |                                                           |     |                                                                                                                                                                                                                                                                                                                                                                                                                                                       |
| 41 |                                                           | 11d | Relevant concomitant care and interventions that are permitted or prohibited during the trial ( <b>pp. 6-7, section “Procedure”</b> )                                                                                                                                                                                                                                                                                                                 |
| 42 |                                                           |     |                                                                                                                                                                                                                                                                                                                                                                                                                                                       |
| 43 |                                                           |     |                                                                                                                                                                                                                                                                                                                                                                                                                                                       |
| 44 | Outcomes                                                  | 12  | Primary, secondary, and other outcomes, including the specific measurement variable (eg, systolic blood pressure), analysis metric (eg, change from baseline, final value, time to event), method of aggregation (eg, median, proportion), and time point for each outcome. Explanation of the clinical relevance of chosen efficacy and harm outcomes is strongly recommended ( <b>pp. 9-10, sections “Primary outcomes”, “Secondary outcomes”</b> ) |
| 45 |                                                           |     |                                                                                                                                                                                                                                                                                                                                                                                                                                                       |
| 46 |                                                           |     |                                                                                                                                                                                                                                                                                                                                                                                                                                                       |
| 47 |                                                           |     |                                                                                                                                                                                                                                                                                                                                                                                                                                                       |
| 48 |                                                           |     |                                                                                                                                                                                                                                                                                                                                                                                                                                                       |
| 49 |                                                           |     |                                                                                                                                                                                                                                                                                                                                                                                                                                                       |
| 50 |                                                           |     |                                                                                                                                                                                                                                                                                                                                                                                                                                                       |
| 51 |                                                           |     |                                                                                                                                                                                                                                                                                                                                                                                                                                                       |
| 52 |                                                           |     |                                                                                                                                                                                                                                                                                                                                                                                                                                                       |
| 53 | Participant timeline                                      | 13  | Time schedule of enrolment, interventions (including any run-ins and washouts), assessments, and visits for participants. A schematic diagram is highly recommended (see Figure) ( <b>Table 1; Fig. 1</b> )                                                                                                                                                                                                                                           |
| 54 |                                                           |     |                                                                                                                                                                                                                                                                                                                                                                                                                                                       |
| 55 |                                                           |     |                                                                                                                                                                                                                                                                                                                                                                                                                                                       |
| 56 |                                                           |     |                                                                                                                                                                                                                                                                                                                                                                                                                                                       |
| 57 |                                                           |     |                                                                                                                                                                                                                                                                                                                                                                                                                                                       |
| 58 |                                                           |     |                                                                                                                                                                                                                                                                                                                                                                                                                                                       |
| 59 |                                                           |     |                                                                                                                                                                                                                                                                                                                                                                                                                                                       |
| 60 |                                                           |     |                                                                                                                                                                                                                                                                                                                                                                                                                                                       |

|                                           |             |    |                                                                                                                                                                                                                                                  |
|-------------------------------------------|-------------|----|--------------------------------------------------------------------------------------------------------------------------------------------------------------------------------------------------------------------------------------------------|
| 1<br>2<br>3<br>4<br>5<br>6<br>7<br>8<br>9 | Sample size | 14 | Estimated number of participants needed to achieve study objectives and how it was determined, including clinical and statistical assumptions supporting any sample size calculations ( <b>pp. 12-13, section “Calculation of sample size”</b> ) |
| 10<br>11<br>12<br>13                      | Recruitment | 15 | Strategies for achieving adequate participant enrolment to reach target sample size ( <b>p. 6, section “Recruitment”</b> )                                                                                                                       |

### Methods: Assignment of interventions (for controlled trials)

#### Allocation:

|                                                    |                                  |     |                                                                                                                                                                                                                                                                                                                                                                                                  |
|----------------------------------------------------|----------------------------------|-----|--------------------------------------------------------------------------------------------------------------------------------------------------------------------------------------------------------------------------------------------------------------------------------------------------------------------------------------------------------------------------------------------------|
| 14<br>15<br>16<br>17<br>18<br>19<br>20<br>21<br>22 | Sequence generation              | 16a | Method of generating the allocation sequence (eg, computer-generated random numbers), and list of any factors for stratification. To reduce predictability of a random sequence, details of any planned restriction (eg, blocking) should be provided in a separate document that is unavailable to those who enrol participants or assign interventions ( <b>pp. 6-7, section “Procedure”</b> ) |
| 23<br>24<br>25<br>26<br>27                         | Allocation concealment mechanism | 16b | Mechanism of implementing the allocation sequence (eg, central telephone; sequentially numbered, opaque, sealed envelopes), describing any steps to conceal the sequence until interventions are assigned ( <b>pp. 6-7, section “Procedure”</b> )                                                                                                                                                |
| 28<br>29<br>30<br>31<br>32                         | Implementation                   | 16c | Who will generate the allocation sequence, who will enrol participants, and who will assign participants to interventions ( <b>pp. 6-7, section “Procedure”</b> )                                                                                                                                                                                                                                |
| 33<br>34<br>35<br>36<br>37<br>38<br>39<br>40<br>41 | Blinding (masking)               | 17a | Who will be blinded after assignment to interventions (eg, trial participants, care providers, outcome assessors, data analysts), and how ( <b>p. 6, section “Procedure”</b> )                                                                                                                                                                                                                   |
|                                                    |                                  | 17b | If blinded, circumstances under which unblinding is permissible, and procedure for revealing a participant’s allocated intervention during the trial ( <b>p. 7, section “Procedure”</b> )                                                                                                                                                                                                        |

### Methods: Data collection, management, and analysis

|                                                                                                                |                         |     |                                                                                                                                                                                                                                                                                                                                                                                                                                                                                                                               |
|----------------------------------------------------------------------------------------------------------------|-------------------------|-----|-------------------------------------------------------------------------------------------------------------------------------------------------------------------------------------------------------------------------------------------------------------------------------------------------------------------------------------------------------------------------------------------------------------------------------------------------------------------------------------------------------------------------------|
| 42<br>43<br>44<br>45<br>46<br>47<br>48<br>49<br>50<br>51<br>52<br>53<br>54<br>55<br>56<br>57<br>58<br>59<br>60 | Data collection methods | 18a | Plans for assessment and collection of outcome, baseline, and other trial data, including any related processes to promote data quality (eg, duplicate measurements, training of assessors) and a description of study instruments (eg, questionnaires, laboratory tests) along with their reliability and validity, if known. Reference to where data collection forms can be found, if not in the protocol ( <b>pp. 7-9, sections “Cognitive Reappraisal Training”, “Control training” “Diagnostic measures”; Table 1</b> ) |
|                                                                                                                |                         | 18b | Plans to promote participant retention and complete follow-up, including list of any outcome data to be collected for participants who discontinue or deviate from intervention protocols ( <b>p. 7, section “Procedure”</b> )                                                                                                                                                                                                                                                                                                |

|    |                                 |     |                                                                               |
|----|---------------------------------|-----|-------------------------------------------------------------------------------|
| 1  |                                 |     |                                                                               |
| 2  | Data                            | 19  | Plans for data entry, coding, security, and storage, including any            |
| 3  | management                      |     | related processes to promote data quality (eg, double data entry;             |
| 4  |                                 |     | range checks for data values). Reference to where details of data             |
| 5  |                                 |     | management procedures can be found, if not in the protocol ( <b>p. 12,</b>    |
| 6  |                                 |     | <b>section “Data management and confidentiality”</b> )                        |
| 7  |                                 |     |                                                                               |
| 8  | Statistical                     | 20a | Statistical methods for analysing primary and secondary outcomes.             |
| 9  | methods                         |     | Reference to where other details of the statistical analysis plan can be      |
| 10 |                                 |     | found, if not in the protocol ( <b>pp. 13-14, section “Statistical</b>        |
| 11 |                                 |     | <b>analysis”</b> )                                                            |
| 12 |                                 |     |                                                                               |
| 13 |                                 | 20b | Methods for any additional analyses (eg, subgroup and adjusted                |
| 14 |                                 |     | analyses) ( <b>p. 14, section “Statistical analysis”</b> )                    |
| 15 |                                 |     |                                                                               |
| 16 |                                 | 20c | Definition of analysis population relating to protocol non-adherence          |
| 17 |                                 |     | (eg, as randomised analysis), and any statistical methods to handle           |
| 18 |                                 |     | missing data (eg, multiple imputation) ( <b>p. 13, section “Statistical</b>   |
| 19 |                                 |     | <b>analysis”</b> )                                                            |
| 20 |                                 |     |                                                                               |
| 21 |                                 |     |                                                                               |
| 22 |                                 |     |                                                                               |
| 23 | <b>Methods: Monitoring</b>      |     |                                                                               |
| 24 |                                 |     |                                                                               |
| 25 | Data monitoring                 | 21a | Composition of data monitoring committee (DMC); summary of its role           |
| 26 |                                 |     | and reporting structure; statement of whether it is independent from          |
| 27 |                                 |     | the sponsor and competing interests; and reference to where further           |
| 28 |                                 |     | details about its charter can be found, if not in the protocol.               |
| 29 |                                 |     | Alternatively, an explanation of why a DMC is not needed ( <b>n.a. A data</b> |
| 30 |                                 |     | <b>monitoring is not needed as the training (cognitive reappraisal</b>        |
| 31 |                                 |     | <b>training) and the control training are expected to carry no risks.</b> )   |
| 32 |                                 |     |                                                                               |
| 33 |                                 | 21b | Description of any interim analyses and stopping guidelines, including        |
| 34 |                                 |     | who will have access to these interim results and make the final              |
| 35 |                                 |     | decision to terminate the trial ( <b>n.a., As the training (cognitive</b>     |
| 36 |                                 |     | <b>reappraisal training) and the control training are expected to</b>         |
| 37 |                                 |     | <b>carry no risks, there are no stopping guidelines and interims</b>          |
| 38 |                                 |     | <b>analyses planned.</b> )                                                    |
| 39 |                                 |     |                                                                               |
| 40 |                                 |     |                                                                               |
| 41 |                                 |     |                                                                               |
| 42 |                                 |     |                                                                               |
| 43 | Harms                           | 22  | Plans for collecting, assessing, reporting, and managing solicited and        |
| 44 |                                 |     | spontaneously reported adverse events and other unintended effects            |
| 45 |                                 |     | of trial interventions or trial conduct ( <b>p. 7, Section “Procedure”</b> )  |
| 46 |                                 |     |                                                                               |
| 47 | Auditing                        | 23  | Frequency and procedures for auditing trial conduct, if any, and              |
| 48 |                                 |     | whether the process will be independent from investigators and the            |
| 49 |                                 |     | sponsor ( <b>n.a.</b> )                                                       |
| 50 |                                 |     |                                                                               |
| 51 |                                 |     |                                                                               |
| 52 | <b>Ethics and dissemination</b> |     |                                                                               |
| 53 |                                 |     |                                                                               |
| 54 | Research ethics                 | 24  | Plans for seeking research ethics committee/institutional review board        |
| 55 | approval                        |     | (REC/IRB) approval ( <b>p. 16, section “Ethics approval”</b> )                |
| 56 |                                 |     |                                                                               |
| 57 |                                 |     |                                                                               |
| 58 |                                 |     |                                                                               |
| 59 |                                 |     |                                                                               |
| 60 |                                 |     |                                                                               |



|    |                   |     |                                                                                  |
|----|-------------------|-----|----------------------------------------------------------------------------------|
| 1  |                   |     |                                                                                  |
| 2  | Protocol          | 25  | Plans for communicating important protocol modifications (eg,                    |
| 3  | amendments        |     | changes to eligibility criteria, outcomes, analyses) to relevant parties         |
| 4  |                   |     | (eg, investigators, REC/IRBs, trial participants, trial registries, journals,    |
| 5  |                   |     | regulators) ( <b>p. 5, section “Methods and analysis”</b> )                      |
| 6  |                   |     |                                                                                  |
| 7  | Consent or assent | 26a | Who will obtain informed consent or assent from potential trial                  |
| 8  |                   |     | participants or authorised surrogates, and how (see Item 32) ( <b>p. 6,</b>      |
| 9  |                   |     | <b>section “Procedure”</b> )                                                     |
| 10 |                   |     |                                                                                  |
| 11 |                   | 26b | Additional consent provisions for collection and use of participant data         |
| 12 |                   |     | and biological specimens in ancillary studies, if applicable ( <b>p. 6,</b>      |
| 13 |                   |     | <b>section “Procedure”</b> )                                                     |
| 14 |                   |     |                                                                                  |
| 15 |                   |     |                                                                                  |
| 16 | Confidentiality   | 27  | How personal information about potential and enrolled participants will          |
| 17 |                   |     | be collected, shared, and maintained in order to protect confidentiality         |
| 18 |                   |     | before, during, and after the trial ( <b>p. 12, section “Data management</b>     |
| 19 |                   |     | <b>and confidentiality”</b> )                                                    |
| 20 |                   |     |                                                                                  |
| 21 |                   |     |                                                                                  |
| 22 | Declaration of    | 28  | Financial and other competing interests for principal investigators for          |
| 23 | interests         |     | the overall trial and each study site ( <b>p. 16, section “Competing</b>         |
| 24 |                   |     | <b>interests”</b> )                                                              |
| 25 |                   |     |                                                                                  |
| 26 | Access to data    | 29  | Statement of who will have access to the final trial dataset, and                |
| 27 |                   |     | disclosure of contractual agreements that limit such access for                  |
| 28 |                   |     | investigators ( <b>p. 12, section “Data management and</b>                       |
| 29 |                   |     | <b>confidentiality”</b> )                                                        |
| 30 |                   |     |                                                                                  |
| 31 |                   |     |                                                                                  |
| 32 | Ancillary and     | 30  | Provisions, if any, for ancillary and post-trial care, and for                   |
| 33 | post-trial care   |     | compensation to those who suffer harm from trial participation ( <b>n.a.</b> )   |
| 34 |                   |     |                                                                                  |
| 35 | Dissemination     | 31a | Plans for investigators and sponsor to communicate trial results to              |
| 36 | policy            |     | participants, healthcare professionals, the public, and other relevant           |
| 37 |                   |     | groups (eg, via publication, reporting in results databases, or other            |
| 38 |                   |     | data sharing arrangements), including any publication restrictions ( <b>p.</b>   |
| 39 |                   |     | <b>2, section “Ethics and Dissemination”</b> )                                   |
| 40 |                   |     |                                                                                  |
| 41 |                   |     |                                                                                  |
| 42 |                   | 31b | Authorship eligibility guidelines and any intended use of professional           |
| 43 |                   |     | writers ( <b>n.a., no intended use of professional writers; author’s</b>         |
| 44 |                   |     | <b>contribution are summarized in pp. 16-17)</b>                                 |
| 45 |                   |     |                                                                                  |
| 46 |                   |     |                                                                                  |
| 47 |                   | 31c | Plans, if any, for granting public access to the full protocol, participant-     |
| 48 |                   |     | level dataset, and statistical ( <b>p. 16, section “Availability of data and</b> |
| 49 |                   |     | <b>material”</b> )                                                               |
| 50 |                   |     |                                                                                  |
| 51 |                   |     |                                                                                  |
| 52 | <b>Appendices</b> |     |                                                                                  |
| 53 |                   |     |                                                                                  |
| 54 | Informed consent  | 32  | Model consent form and other related documentation given to                      |
| 55 | materials         |     | participants and authorised surrogates ( <b>n.a., documents in German</b> )      |
| 56 |                   |     |                                                                                  |
| 57 | Biological        | 33  | Plans for collection, laboratory evaluation, and storage of biological           |
| 58 | specimens         |     | specimens for genetic or molecular analysis in the current trial and for         |
| 59 |                   |     | future use in ancillary studies, if applicable ( <b>n.a.</b> )                   |
| 60 |                   |     |                                                                                  |

1 \*It is strongly recommended that this checklist be read in conjunction with the SPIRIT 2013  
2 Explanation & Elaboration for important clarification on the items. Amendments to the  
3 protocol should be tracked and dated. The SPIRIT checklist is copyrighted by the SPIRIT  
4 Group under the Creative Commons "[Attribution-NonCommercial-NoDerivs 3.0 Unported](#)"  
5 license.  
6  
7  
8  
9  
10  
11  
12  
13  
14  
15  
16  
17  
18  
19  
20  
21  
22  
23  
24  
25  
26  
27  
28  
29  
30  
31  
32  
33  
34  
35  
36  
37  
38  
39  
40  
41  
42  
43  
44  
45  
46  
47  
48  
49  
50  
51  
52  
53  
54  
55  
56  
57  
58  
59  
60

For peer review only

# BMJ Open

## Study protocol for a randomized-controlled study on emotion regulation training for adolescents with major depression: the KONNI study

|                                 |                                                                                                                                                                                                                                                                                                                                                                                                                                                                                                                                                                                                                                                                                                                                                                                                                                                                                                                                                                  |
|---------------------------------|------------------------------------------------------------------------------------------------------------------------------------------------------------------------------------------------------------------------------------------------------------------------------------------------------------------------------------------------------------------------------------------------------------------------------------------------------------------------------------------------------------------------------------------------------------------------------------------------------------------------------------------------------------------------------------------------------------------------------------------------------------------------------------------------------------------------------------------------------------------------------------------------------------------------------------------------------------------|
| Journal:                        | <i>BMJ Open</i>                                                                                                                                                                                                                                                                                                                                                                                                                                                                                                                                                                                                                                                                                                                                                                                                                                                                                                                                                  |
| Manuscript ID                   | bmjopen-2019-036093.R1                                                                                                                                                                                                                                                                                                                                                                                                                                                                                                                                                                                                                                                                                                                                                                                                                                                                                                                                           |
| Article Type:                   | Protocol                                                                                                                                                                                                                                                                                                                                                                                                                                                                                                                                                                                                                                                                                                                                                                                                                                                                                                                                                         |
| Date Submitted by the Author:   | 15-Apr-2020                                                                                                                                                                                                                                                                                                                                                                                                                                                                                                                                                                                                                                                                                                                                                                                                                                                                                                                                                      |
| Complete List of Authors:       | Greimel, Ellen; University Hospital Munich, Department of Child and Adolescent Psychiatry, Psychosomatics and Psychotherapy<br>Feldmann, Lisa; University Hospital Munich, Department of Child and Adolescent Psychiatry, Psychosomatics and Psychotherapy<br>Piechaczek, Charlotte; University Hospital Munich, Department of Child and Adolescent Psychiatry, Psychosomatics and Psychotherapy<br>Oort, Frans; University of Amsterdam, Research Institute of Child Development and Education<br>Bartling, Juergen; University Hospital Munich, Department of Child and Adolescent Psychiatry and Psychotherapy<br>Schulte-Rüther, Martin; RWTH Aachen University, Translational Brain Medicine in Psychiatry and Neurology, Department of Child and Adolescent Psychiatry, Psychosomatics, and Psychotherapy; JARA-Brain<br>Schulte-Körne, Gerd ; University Hospital Munich, Department of Child and Adolescent Psychiatry, Psychosomatics and Psychotherapy |
| <b>Primary Subject Heading</b>: | Mental health                                                                                                                                                                                                                                                                                                                                                                                                                                                                                                                                                                                                                                                                                                                                                                                                                                                                                                                                                    |
| Secondary Subject Heading:      | Pharmacology and therapeutics                                                                                                                                                                                                                                                                                                                                                                                                                                                                                                                                                                                                                                                                                                                                                                                                                                                                                                                                    |
| Keywords:                       | Child & adolescent psychiatry < PSYCHIATRY, Depression & mood disorders < PSYCHIATRY, Clinical trials < THERAPEUTICS, NEUROPHYSIOLOGY                                                                                                                                                                                                                                                                                                                                                                                                                                                                                                                                                                                                                                                                                                                                                                                                                            |
|                                 |                                                                                                                                                                                                                                                                                                                                                                                                                                                                                                                                                                                                                                                                                                                                                                                                                                                                                                                                                                  |

SCHOLARONE™  
Manuscripts



I, the Submitting Author has the right to grant and does grant on behalf of all authors of the Work (as defined in the below author licence), an exclusive licence and/or a non-exclusive licence for contributions from authors who are: i) UK Crown employees; ii) where BMJ has agreed a CC-BY licence shall apply, and/or iii) in accordance with the terms applicable for US Federal Government officers or employees acting as part of their official duties; on a worldwide, perpetual, irrevocable, royalty-free basis to BMJ Publishing Group Ltd ("BMJ") its licensees and where the relevant Journal is co-owned by BMJ to the co-owners of the Journal, to publish the Work in this journal and any other BMJ products and to exploit all rights, as set out in our [licence](#).

The Submitting Author accepts and understands that any supply made under these terms is made by BMJ to the Submitting Author unless you are acting as an employee on behalf of your employer or a postgraduate student of an affiliated institution which is paying any applicable article publishing charge ("APC") for Open Access articles. Where the Submitting Author wishes to make the Work available on an Open Access basis (and intends to pay the relevant APC), the terms of reuse of such Open Access shall be governed by a Creative Commons licence – details of these licences and which [Creative Commons](#) licence will apply to this Work are set out in our licence referred to above.

Other than as permitted in any relevant BMJ Author's Self Archiving Policies, I confirm this Work has not been accepted for publication elsewhere, is not being considered for publication elsewhere and does not duplicate material already published. I confirm all authors consent to publication of this Work and authorise the granting of this licence.

# Study protocol for a randomized-controlled study on emotion regulation training for adolescents with major depression: the KONNI study

Ellen Greimel<sup>a\*</sup>, Lisa Feldmann<sup>a\*</sup>, Charlotte Piechaczek<sup>a</sup>, Frans Oort<sup>b</sup>, Juergen Bartling<sup>a</sup>, Martin Schulte-Rüther<sup>c,d</sup> & Gerd Schulte-Körne<sup>a</sup>

<sup>a</sup>Department of Child and Adolescent Psychiatry, Psychosomatics and Psychotherapy, University Hospital, LMU Munich, Munich, Germany

<sup>b</sup>Research Institute of Child Development and Education, University of Amsterdam, Amsterdam, The Netherlands

<sup>c</sup>Translational Brain Medicine in Psychiatry and Neurology, Department of Child and Adolescent Psychiatry, Psychosomatics, and Psychotherapy, RWTH Aachen University

<sup>d</sup>JARA-Brain, Aachen, Germany

\*shared first-authorship

## Address for reprints or correspondence:

Ellen Greimel, Department of Child and Adolescent Psychiatry and Psychotherapy, University Hospital Munich, Munich, Germany

E-mail: [Ellen.Greimel@med.uni-muenchen.de](mailto:Ellen.Greimel@med.uni-muenchen.de), Phone: +49 89 4400 56952, Fax: +49 89 4400 55902

**Word count - original submission: 4.221 (3.927 excluding the Discussion)**

**Word count – revision: 4.745 (4.315 excluding the Discussion)**

## Abstract

**Introduction:** Major depression (MD) often has its onset during adolescence and is associated with significant morbidity and mortality. One important factor for the development and maintenance of adolescent MD are disturbances in emotion regulation and the underlying neural processes. Cognitive reappraisal (CR) is a particular adaptive emotion regulation strategy. Previously, it has been shown in healthy adults that a task-based training in CR is efficient to reduce negative affect, and that these effects translate into everyday life.

The present randomized-controlled trial examines for the first time whether a task-based training in CR proves effective in MD adolescents. Specifically, we will investigate whether the CR training improves the ability to down-regulate negative affect in MD individuals as assessed by behavioral and neurobiological indices, and whether training effects generalize outside the laboratory.

**Methods and analysis:** Adolescents with MD will be randomly allocated to a group that either receives a task-based training in CR or control training. Both involve four training sessions over a time period of two weeks. In the CR training, participants will be instructed to down-regulate negative affective responses to negative pictures by means of CR, while the control training involves picture viewing. During the training sessions, the Late Positive Potential, gaze fixations on negative picture aspects and affective responses to pictures will be collected. Before and after the training programs, and at a two-week follow-up, overall negative and positive affect, rumination and perceived stress will be assessed as primary outcomes. ANOVAs will be conducted to test the effectiveness of the CR training with regard to both primary outcomes and task-based behavioral and neurobiological parameters.

**Ethics and dissemination:** The study was approved by the institutional review board of the local ethics committee. The results will be published in peer-reviewed journals and disseminated through conferences, social media and public events.

**Trial Registration:** Clinical Trials NCT03957850, registered Mai 21st 2019; URL: <https://clinicaltrials.gov/ct2/show/NCT03957850>.

### Strengths and limitations of the study:

- This study is the first to examine the effectiveness of a targeted CR training in youths with major depression.
- A randomized-controlled design is employed including an active control group.
- In addition to behavioral and questionnaire data, objective neurobiological indices will be collected to assess the effectiveness of the CR training.
- If proven effective, the CR training can be a promising and cost-effective approach to complement and enhance the efficacy of established treatments for adolescent MD.
- As the follow-up is limited to two weeks, the long-term effectiveness needs to be explored in future studies.

## Introduction

Major depression (MD) is among the most debilitating, costly and common psychiatric disorders worldwide.[1] The risk of suffering from a depressive episode sharply rises during adolescence, with point prevalence rates of up to 7%.[2] Adolescents with MD show deficient emotion regulation (ER),[3] i.e., they have difficulties to modulate emotional responses by initiating appropriate regulatory processes.[4] Disturbances in ER and the underlying neural processes have been suggested to be an important risk factor for the development and maintenance of MD.[3, 5] Thus, the development of training regimens that target deficient ER in MD is an important research avenue.

Cognitive-behavioral therapy (CBT) belongs to the gold standard treatments in juvenile MD. However, less than 50% of MD adolescents respond to CBT and only about one third enter remission after treatment.[6, 7] Given the debilitating consequences of adolescent MD,[8] there is an urgent need to enhance the efficacy of established intervention. Recent findings in adults with MD suggest that an additional training of ER might be a promising approach to improve treatment effects.[9, 10] To date, it remains unclear whether these findings can be transferred to juvenile MD. In this regard, the present study takes a first step and systematically investigates the effects of a focused ER training in adolescent MD.

## Cognitive reappraisal in depressed individuals

Cognitive reappraisal (CR) is a frequently studied ER strategy and involves the reinterpretation of a situation such that the emotional response is changed. The habitual use of CR has been shown to relate to good interpersonal functioning and well-being.[11] Questionnaire studies have found that depressive symptoms are associated with less habitual use of CR and more use of maladaptive emotion regulation strategies such as rumination.[12-14] It has been proposed that this habitual pattern in depressed individuals might originate from deficits in the inhibition of negative material which is thought to enhance ruminative thoughts but hampering the effective reappraisal of negative information.[15] To experimentally investigate CR in MD, studies applied a well-established CR paradigm during which participants are instructed to reappraise negative pictures. This regulation condition is compared to an unregulated condition, during which participants are asked to simply attend to negative stimuli. Within

1  
2  
3 the framework of this paradigm, a number of studies in MD collected behavioral measures of self-  
4 reported affect to assess regulation success. Contrary to expectation, some studies found no group  
5 differences between depressive and healthy participants in this index of CR.[16, 17] However, these  
6 results might be biased due to social desirability which probably obscures group differences. Moreover,  
7 complex ER disturbances are unlikely to be captured using simple affect ratings,[18, 19] highlighting  
8 the importance of additionally assessing objective and more sensitive parameters when studying CR,  
9 including neurobiological indices.

10  
11 A commonly studied neurobiological index of CR is the Late Positive Potential (LPP). Studies in healthy  
12 samples show that the LPP is reduced when individuals are instructed to reappraise unpleasant stimuli  
13 compared to attending to unpleasant pictures.[20-22] This decrease is thought to reflect a reduction of  
14 the emotional response following CR, which may result from a shift in stimulus meaning.[23, 24]  
15 Depressive psychopathology has been shown to be associated with a smaller reduction of the LPP during  
16 CR.[23, 25, 26] However, to date, no study has investigated whether this neurobiological disturbance  
17 can be normalized by a repeated training of CR.

18  
19 Besides the LPP, a number of studies in healthy individuals have investigated gaze fixation patterns to  
20 gain insight into the mechanisms underlying CR.[27-29] They found that a greater regulation success is  
21 paralleled by less gaze fixations directed towards negative picture cues. This suggests that the regulatory  
22 effects of CR may partly be attributed to gaze deployment, highlighting the importance of also assessing  
23 gaze fixation when examining CR.

### 24 25 26 **Trainability of cognitive reappraisal**

27  
28 Evidence from a randomized controlled trial (RCT) in adult MD suggests that systematically training  
29 ER skills in addition to standard CBT improves treatment efficacy.[9, 10] As the ER training of this  
30 RCT aimed at enhancing general ER skills and included CR among other ER strategies, the unique  
31 contribution of CR remains to be investigated. A recent investigation addressed this issue experimentally  
32 in healthy adults,[30] demonstrating that a task-based CR training resulted in less perceived stress in  
33 daily life. Beneficial effects of a task-based CR training have recently also been shown in healthy and  
34 anxious adolescents.[31] While these results are encouraging, it needs to be examined whether the



1  
2  
3 findings can be extended to MD samples and whether a CR training results in reductions in depressive  
4 symptomatology, including ruminative thoughts. In this context, it has been proposed that CR training  
5 improves cognitive control abilities, including the ability to inhibit negative material. As impairments  
6 in the ability to inhibit negative information are thought to play a causal role in rumination, training the  
7 ability to reappraise negative information should thus reduce ruminative thoughts.[15]  
8  
9  
10  
11  
12  
13  
14  
15

### 16 **Aim of the study**

17 The aim of the study is to assess whether in MD adolescents, a task-based CR training results in an  
18 improved downregulation of negative affective responses as assessed by behavioral and neurobiological  
19 indices. Moreover, the study aims to investigate whether the training effects generalize outside the  
20 laboratory, i.e., lead to affect-related changes and a reduction in perceived stress and rumination.  
21  
22  
23  
24  
25

26 It is hypothesized that over the course of the CR training, MD adolescents show improvements in the  
27 downregulation of negative affective responses as assessed by task-based behavioral[30] and  
28 neurobiological indices. Based on prior research,[30, 31] it is further hypothesized that the CR training  
29 results in improvements in affect- and stress-related symptoms in daily life.  
30  
31  
32  
33  
34  
35  
36  
37

### 38 **Methods and analysis**

39 The study (Public and scientific Title: Cognitive Reappraisal in Adolescents with Major Depression:  
40 From Neurobiological Mechanisms to Intervention; German acronym: KONNI) was prospectively  
41 registered on ClinicalTrials.gov (NCT03957850) before recruitment start. The study protocol and the  
42 template informed consent/assent forms (including two amendments) were approved by the institutional  
43 review board of the local ethics committee (Ludwig-Maximilians-University Medical Division Ethics  
44 Committee, Munich, Germany; study ID: 63-16) on 30<sup>th</sup> January 2019 and are reported in line with the  
45 Standard Protocol Items: Recommendations for Interventional Trials Statement (SPIRIT 2013).  
46 Important modifications to the study protocol would require an additional amendment, which would  
47 have to be approved by the Ethics Committee before implementation. The trial registry  
48 (ClinicalTrials.gov) would then be updated.  
49  
50  
51  
52  
53  
54  
55  
56  
57  
58  
59  
60

## Design

This interventional study is designed as a short-term randomized controlled, participant-blind clinical superiority trial including two parallel groups of MD adolescents. Participants will be randomly assigned to a group that receives task-based training in CR or to a control training. All participants will take part in one diagnostic assessment (T0), four training sessions (T1-4) over the course of two weeks, and a follow-up two weeks after T4. All questionnaires and test procedures are summarized in Table 1. During the training sessions, task-based indices of CR will be continuously assessed based on behavioral affect ratings and the LPP. Moreover, eye gaze will be recorded during the task-based training. The KONNI study design is depicted in Figure 1.

## Participants

Participants aged 12-18 years with a current ICD-10 diagnosis of MD,[32] an IQ of  $\geq 80$  and sufficient German language skills will be included. The following exclusion criteria will be applied: acute suicidality, neurological disorders, schizophrenic disorder, pervasive developmental disorder, bipolar disorder, borderline personality disorder, substance dependence disorder and gender dysphoria. Participants with other psychiatric comorbidities are included if MD is the primary diagnosis.

## Recruitment

MD adolescents will be primarily recruited from the Department of Child and Adolescent Psychiatry, Psychosomatics and Psychotherapy, University Hospital of the LMU Munich, Germany. Currently untreated MD patients from the waiting list, and in-and outpatients are enrolled in the study. The first participant was enrolled in May 27<sup>th</sup>, 2019. The planned completion of participant enrollment is in April 2021. Since the start of the study n=15 subjects were enrolled.

## Procedure

Adolescents and one parent/legal custodian (for participants <18 years) will be contacted by an experienced study nurse certified in Good Clinical Practice (GCP) and will be informed about the study details, including the fact that the allocation to the training groups will be made based on a predefined

1  
2  
3 randomization list. All potential study participants and their parents/legal custodians will be approached  
4  
5 by the study nurse unless it is known beforehand that the exclusion criteria are met (e.g., acute  
6  
7 suicidality, gender dysphoria). If the clinicians of potential participants conclude that the capacity to  
8  
9 provide informed consent/assent are not met (e.g., in case of insufficient German skills, cognitive  
10  
11 disability or an acute crisis), participants and their parents/legal custodians will not be approached. In  
12  
13 case of interest in participation, their written informed consent/assent will be collected. In the written  
14  
15 informed consent/assent, participants and their parent/legal custodian are asked for their permission that  
16  
17 the data can also be used for an ancillary case-control study on neurobiological underpinnings of ER in  
18  
19 MD. The participants and the parent/legal custodian will be blinded regarding allocation to the  
20  
21 CR/control training group until study completion and only unblinded prior to study completion if they  
22  
23 terminate participation prematurely. At the first session (T0), a diagnostic interview and other baseline  
24  
25 measures (see below) will be applied to the adolescent and will last ~2,5 hours. The diagnostic session  
26  
27 will be conducted by psychologically trained staff.

28  
29  
30 If the participant is eligible for the study, the following session appointments will be scheduled and the  
31  
32 participant will be randomly allocated to the CR or the control training group. To ensure allocation  
33  
34 concealment, the random allocation to one of the groups is implemented after completion of baseline  
35  
36 measurements; i.e., neither the recruiter nor the person conducting the baseline session know to which  
37  
38 group the participant will be assigned after T0. Access to the allocation list is limited to the principal  
39  
40 investigator (E.G.) and her deputy (L.F.), who will inform the experimenters about the allocation of the  
41  
42 participant shortly before the first training session (after the diagnostic session and the decision to  
43  
44 include the participant in the study). Randomization stratifying for age (<15 years vs. ≥15 years of age)<sup>1</sup>  
45  
46 and sex will be performed by a statistician, who is neither involved in recruitment nor in testing of  
47  
48 participants. The randomization will be performed with a 1:1 allocation. A follow-up session will take  
49  
50 place two weeks after completion of the forth training session. After the follow-up, participants are  
51  
52 unblinded regarding group allocation by one of the experimenters. As expense allowance for study  
53  
54 participation (~10 hours including follow-up), the participants will receive 100€. Participation is  
55  
56  
57  
58  
59

---

60 <sup>1</sup> Based on prior studies in MD adolescents conducted in our department, 15 is the expected approximate median age of MD participants.

1  
2  
3 voluntary and can be discontinued at any time for any reason. Participation is discontinued in case of  
4  
5 acute suicidality during the study. No other criteria for discontinuation are defined. To assess the  
6  
7 feasibility of conducting a large-scale multi-center RCT on the effects of a CR training in addition to  
8  
9 standard treatment, the following data will be collected and reported: participation and non-participation  
10  
11 rate, drop-outs and reasons for drop-outs, training attendance rates and spontaneously reported adverse  
12  
13 effects. Treatment fidelity concerning the training is assured by standardized oral and written instructions  
14  
15 and by comprehensive training of the experimenters. The experimenters will be either clinical  
16  
17 psychologists or advanced and in-depth trained psychology students. The concomitant treatment as usual  
18  
19 is permitted during the ongoing study and information on the type of treatment during the study will be  
20  
21 assessed. Moreover, patient safety data will be assessed by recording any spontaneously reported  
22  
23 adverse effects.  
24  
25  
26  
27

### 28 **Cognitive Reappraisal Training**

29  
30 The CR training task is well-established and is adapted from previous studies,[22, 33-35] including a  
31  
32 study from our group, in which we demonstrated that adolescents with MD understand and comply with  
33  
34 task instructions, and are able to down-regulate negative affective responses to negative pictures via  
35  
36 CR.[36] The training procedure was adapted from [30]. An exemplary illustration of an experimental  
37  
38 trial is depicted in Figure 2. Participants will be presented emotional pictures which are preceded by a  
39  
40 condition specific cue signaling the appropriate strategy (attend vs. reappraise) during picture  
41  
42 presentation. Following each picture, participants are instructed to indicate their affective response to  
43  
44 the image on the portrait version of the nine-point self-assessment manikin scale for valance [SAM; 37,  
45  
46 for the portrait version see 38, 39], which has been frequently applied in youth samples.[40, 41] A higher  
47  
48 score on this scale indicates a more positive valance rating. The task involves four conditions: 1)  
49  
50 **Negative-reappraise:** participants are asked to view negative pictures and to decrease their affective  
51  
52 response by reappraising the negative event. Participants are explicitly instructed to use the  
53  
54 reinterpretation tactic during CR, which involves “mentally changing the meaning of the actions, context  
55  
56 and/or outcome depicted in a stimulus”.[30] 2) **Negative-attend**, 3) **Neutral-attend** and 4) **Positive-**  
57  
58 **attend:** participants are asked to view the pictures and to respond naturally to them without trying to  
59  
60

1  
2  
3 alter their affective response. Comparison of the negative-reappraise and the negative-attend conditions  
4 allows assessing behavioral and neural indices of reappraisal success. The neutral-attend and the  
5 positive-attend conditions are included to avoid slight changes in negative affect due to the exclusive  
6 presentation of unpleasant pictures.[42]  
7  
8  
9

10  
11 The training task will be repeated over four training sessions. Before the first session, participants will  
12 complete a comprehensive practice training, during which a trained experimenter will provide  
13 standardized oral instructions regarding the task and the two strategies (attend, reappraise).[30, 36]  
14  
15 Thereafter, walk-through images are presented to confirm the appropriate use of the strategies. Task  
16 instructions will be briefly summarized before each training session.  
17  
18  
19

20  
21 In each training session, 144 pictures will be presented in 3 blocks, each containing 12 positive-attend,  
22 12 neutral-attend, 12 negative-attend, and 12 negative-reappraise trials. Developmentally appropriate  
23 pictures (e.g., excluding pictures of dead persons or pornographic images) are taken from the  
24 International Affective Picture System,[IAPS; 43] Besançon Affective Picture Set-Adolescents,[BAPS-  
25 Ado; 44] and Besançon Affective Picture Set-Adults,[BAPS-Adult; 45] with the latter two sets being  
26 derived from the Besançon Attachment Pictures Set. Each picture will be presented twice over the course  
27 of the training.[30] To ensure adherence to task instructions, participants will fill in a questionnaire after  
28 each training session to indicate which strategies they used during the task.  
29  
30  
31  
32  
33  
34  
35  
36  
37  
38  
39  
40

### 41 **Control training**

42  
43 The control training is implemented to account for unspecific effects and the task employed is similar  
44 to the CR task except that it involves no “negative-reappraise” condition. Instead, the control task only  
45 involves attend conditions (negative-attend, neutral-attend, positive-attend). To keep the total number  
46 of trials involving negative pictures constant across the two groups, the control task involves twice as  
47 many negative-attend trials as the CR training group. Mirroring the CR training procedure, the control  
48 training is repeated over four sessions and preceded by standardized oral instructions and a practice  
49 session. Participants of the control training group will also fill in a questionnaire on how they resolved  
50 the task after each training session.  
51  
52  
53  
54  
55  
56  
57  
58  
59  
60

## Measures

Information about psychometric properties of all measures described in the following paragraph are summarized in Table 1 along with the respective assessments points.

### Diagnostic measures

A diagnosis of MD and potential comorbidities will be assessed using a well-established German standardized semi-structured diagnostic interview (Kinder-DIPS).[46, 47] The interview will be administered by experienced, psychologically trained experimenters. To assess inter-rater reliability based on Cohen's kappa ( $k$ ), 10% of the Kinder-DIPS interviews will be rated by two experimenters. IQ will be estimated based on the first part of the CFT-20-R.[48] For some patients, results from other established IQ tests [e.g. WISC-V; 49] will be available from routine care, which will be used instead.

### Outcome measures

#### Primary outcomes

The primary outcomes of the study are (1) change in rumination from baseline (T0) to post-training (directly after T4) and follow-up [assessed by the scales "self-focused rumination" and "symptom-focused rumination" of the German short version of the Response Styles Questionnaire; RSQ-D; 50]; (2) change in depressive symptoms [assessed by the German version of the Beck Depression Inventory – Second Edition; BDI-II; 51] from baseline (T0) to post-training (directly after T4); (3) change in perceived stress over the course of the four training sessions and at follow-up [assessed by the German translation of the Perceived Stress Scale 10; PSS-10; by Prof. Dr. Arndt Büssing; 52]<sup>2</sup>; (4) changes in negative and positive affect [assessed by the Negative Affect Scale and Positive Affect Scale for Children Shortened Version; PANAS-C-SF; 53] over the course of the four training sessions and at follow-up.

#### Secondary outcomes

---

<sup>2</sup>In the PSS-10, items were reworded to “in the past few days” instead of “in general” to better allow assessing changes of the course of the training.

1  
2  
3 One secondary outcome is the change in the downregulation of affective behavioral responses to  
4 negative pictures by means of CR. Affective behavioral responses to negative pictures will be  
5 continuously assessed during each of the four training sessions using the SAM rating scale.[37, with the  
6 portrait version from 38, 39]  
7  
8  
9

10  
11 Another secondary outcome is the change in the downregulation of the early and late LPP amplitude to  
12 negative pictures by means of CR. The LPP elicited to pictures in the negative-attend and the negative-  
13 reappraise condition will be continuously assessed during each of the four training sessions.  
14 Additionally, changes in the percent duration of gaze fixations within a-priori defined emotional interest  
15 areas of negative pictures<sup>3</sup> will be assessed during both the negative-attend and negative-reappraise  
16 condition over the course of the four training sessions.  
17  
18  
19  
20  
21  
22  
23

24 All secondary outcome measures will only be assessed in the CR training group, as participants in the  
25 control training group are not instructed to apply CR. However, these measures will also be assessed in  
26 the control training group during the negative-attend condition to allow additional exploratory analyses.  
27  
28  
29  
30  
31

### 32 **Confounding variable**

33 Participants will complete the Social Desirability Scale.[SES-17; 54] The rationale for assessing this  
34 confounding variable is that behavioral ratings of affective responses to pictures will be assessed, which  
35 are prone to response biases.[18]  
36  
37  
38  
39  
40  
41  
42

### 43 **Mediators**

44 State rumination during the training will be treated as a potential mediator as ruminative thoughts might  
45 hamper beneficial training effects.[55] After completion of each training session, participants in the CR  
46 and control training group rate state rumination during the task on a scale from 0 “not at all” to 10  
47 “exactly” based on a 5-item questionnaire applied in a previous study.[56]  
48  
49  
50  
51  
52

53 We will also assess a potential mediating role of executive function abilities, which are thought to be  
54 critically involved in ER.[57] Individual baseline differences in executive function abilities might thus  
55 prove important mediators of training outcome. Therefore, set-shifting, working memory and inhibition  
56  
57  
58  
59  
60

---

<sup>3</sup>Emotional areas of interest of negative pictures will be defined based on a separate validation study.

1  
2  
3 [58, 59] as the three core components of executive functions will be assessed based on the TAP  
4  
5 2.3.[Testbatterie zur Aufmerksamkeitsprüfung; 60]

6  
7 Moreover, we will treat habitual ER as a potential mediator, which will be assessed based on the FEEL-  
8  
9 KJ [61]. The FEEL-KJ is a self-report questionnaire assessing habitual adaptive and maladaptive ER  
10  
11 strategies.  
12

### 13 14 15 16 **Moderators**

17  
18 As anxiety disorders/symptoms frequently co-occur with MD,[62] state and trait anxiety will be assessed  
19  
20 based on the State-Trait-Anxiety Inventory (STAI).[63] Moreover, symptoms of psychopathology will  
21  
22 be screened using the Child Behavior Checklist (CBCL 6-18R).[64] Both variables will be treated as  
23  
24 potential moderators.  
25

### 26 27 28 **Eye-tracking apparatus**

29  
30 During the four training sessions, eye-movements will be continuously recorded using the Eyelink 1000  
31  
32 Plus SR Research eye-tracker. At the beginning of the training, participants are seated at the viewing  
33  
34 distance of approx. 55 cm from the monitor and a 9-point calibration is performed. Prior to each  
35  
36 experimental trial, a drift correction is conducted.  
37  
38

### 39 40 41 **Electroencephalogram recording and preprocessing**

42  
43 The electroencephalogram data is recorded using the Electrical Geodesic Inc. 128-channel system with  
44  
45 500 Hz sampling rate and Cz as reference electrode. Impedance is kept below 50 k $\Omega$  during recording.  
46  
47 The further preprocessing and analyses steps will be performed with Brainvision Analyzer 2.1 (Brain  
48  
49 Products GmbH, Germany). After filtering, removal of electro-oculographic artefacts based on  
50  
51 Independent Component Analysis and exclusion of other artefacts, the signal will be re-referenced. Data  
52  
53 will be segmented into epochs, baseline-corrected and averaged separately for each participant and  
54  
55 condition. The LPP will be measured as the mean amplitude at a centro-parietal region-of-interest within  
56  
57 early (<300ms) and late time windows ( $\geq$ 300 ms) following picture onset.[33, 65]  
58  
59  
60



### **Data management and confidentiality**

All data will be entered electronically in IBM SPSS statistics by a scientific assistant. Plausibility and completeness checks will be regularly performed by E.G., L.F., C.P. to promote and monitor data quality. Original documents will be maintained for 15 years in the department. All original and electronic data is stored on the hospitals server under a pseudorandomized coded ID, which does not contain names or birth dates of the participants. Only the project leader and her deputies have access to the participants' names and the corresponding allocation to the encryption code and the original documents, which are kept in locked cabinets. The records containing names and other personal identifiers (e.g., informed consent/assent forms) will be stored in locked cabinets separately from the study records which are identified by the coded ID. The participants' study information will not be released outside the study, except in case of threat to self or threat to others. The final cleaned data sets will be provided to all investigators of the study. To adhere to principles of open science and to facilitate further use of aggregated data in meta-analytic approaches, we will consider making raw data available to other researchers if this can be achieved along with protecting sensitive patient information, such as sociodemographic information. Since patients could possibly be identified by making our raw data publicly available, ethical principles of protecting patient confidentiality would be breached. Aggregated group data can be made available upon request.

### **Calculation of sample size**

A rough approximation of the requested sample size targeted at rumination as one of the primary outcomes can be achieved by referring to a previous study.[66] This study investigated the effects of a task-based cognitive control training compared to treatment as usual in adult MD. The training aimed at improving ER skills indirectly by targeting mechanisms thought to underlie ER. This study reported a large effect size in the training group from pre to post (Cohen's  $d=1.42$ ) on a measure related to negative affect (rumination). Based on a conservative assumption, a large effect size of  $d=0.85$  is expected with regard to changes in rumination for the CR training from pre to post. For the control training, a small effect size ( $d=0.2$ ) is expected from pre to post due to unspecific "positive" effects of the control

1  
2  
3 intervention. This effect size is based on prior evidence<sup>4</sup> on the effects of a similar control training in  
4  
5 young adults.[30]

6  
7 Based on these assumptions, calculation of the required sample size to detect a significant 2(group) x  
8  
9 2(time: T0=pre, T4=post) interaction for rumination using a repeated measures ANOVA with a 5% level  
10  
11 of significance ( $\alpha=0.05$ ) and 80% statistical power ( $1-\beta=0.80$ ) revealed an  $N=47$  for the total  
12  
13 group (assuming a 0.7 pre-post correlation). The drop-out rate for the study is estimated at approx. 33%.  
14  
15 Thus,  $n=35$  adolescents will be enrolled in each group. The necessary sample size was calculated with  
16  
17 G\*power 3.1. Statistical power of analyses that involve more measurements, such as the analysis of  
18  
19 affect, will have more than 80% statistical power if effect sizes are similar.  
20  
21  
22  
23

### 24 **Statistical analysis**

25  
26 To test the hypotheses that the CR training results in a stronger decrease in depressive  
27  
28 symptoms/rumination from baseline to post-training assessment compared to a control training, a mixed-  
29  
30 model ANOVA with the factors group (CR vs. control training) and time (T0, T4) will be conducted for  
31  
32 the BDI-II and the two RSQ-D scales “self-focused rumination”, “symptom-focused rumination”. To  
33  
34 account for the fact that the RSQ-D will be reassessed at follow-up, a mixed-model ANOVA with the  
35  
36 factors group (CR vs. control training) and time (T0, T4, follow-up) will additionally be conducted for  
37  
38 the two rumination scales. Mixed modeling (also known as multilevel analysis, with observations  
39  
40 “nested” within participants) has the advantage over regular repeated measures ANOVA that all  
41  
42 available data can be used, including data from incomplete cases, without using imputation techniques  
43  
44 for missing data.[67] To test the hypotheses that the CR training results in a a) stronger decrease in  
45  
46 negative and b) stronger increase in positive affect from pre- to post-training and follow-up assessment  
47  
48 compared to the control training, mixed-model ANOVAs with the factors group (CR vs. control training)  
49  
50 and time (T1, T2, T3, T4, follow-up) will be conducted for the Negative Affect/ Positive Affect scale of  
51  
52 the PANAS-C-SF. The same statistical model procedure will be applied for perceived stress (PSS-10).  
53  
54  
55  
56  
57  
58  
59

---

60 <sup>4</sup> Detailed statistical information was derived from personal communication with corresponding author of this  
study; B. Denny, April 26th, 2017.

1  
2  
3 To test the hypothesis that over the course of the CR training, MD adolescents show an increased  
4 downregulation of the early and late LPP amplitude via CR, a mixed-model ANOVA with the factors  
5 2(condition: negative-reappraise, negative-attend) x 4(training session: T1, T2, T3, T4) will be  
6 conducted separately for early and late LPP time windows. The same statistical procedure will be  
7 conducted for the affective ratings of negative pictures and the percent of gaze fixation duration in  
8 emotional areas of negative pictures. Correlation analyses will be performed between the percent of gaze  
9 fixation duration in emotional areas of negative pictures and ER success (downregulation of the LPP  
10 and affective ratings of negative pictures via CR).  
11  
12

13  
14 To examine changes of the LPP, affective ratings of negative pictures and gaze fixations for the negative-  
15 attend condition in the control training group over the course of the training, additional exploratory  
16 ANOVAs will be conducted. Likewise, for the control training group, exploratory correlation analyses  
17 will be calculated to examine relationships between these measures and gaze fixation duration in  
18 emotional areas of negative pictures. Finally, moderation and mediation analyses will be applied to  
19 examine the role of mediating and moderating variables.  
20  
21  
22  
23  
24  
25  
26  
27  
28  
29  
30  
31  
32  
33  
34

### 35 **Patient and public involvement**

36 Participants or their parents were not involved in designing the study. However, we will present the  
37 results of the study to parent and participant representatives to include their suggestions in the  
38 dissemination plan. Moreover, parallel to publication of the results, all participants and their families  
39 will receive a letter summarizing the main findings and conclusions in comprehensible language.  
40  
41  
42  
43  
44  
45  
46

### 47 **Discussion**

48 This study will for the first time elucidate whether in adolescents with MD, a CR training shows  
49 beneficial effects both in and outside the laboratory. If the training proves effective, this approach might  
50 be a promising resource-effective intervention for adolescents with MD. Such an intervention could,  
51 e.g., be applied to bridge the often long waiting times for treatment of MD or as an adjunction to a  
52 treatment as usual. Moreover, after psychoeducation on CR and guided practice of this strategy in  
53 psychotherapy, the training could also be (online) applied as an adjunct to treatment as usual. In such a  
54  
55  
56  
57  
58  
59  
60

1  
2  
3 context, the psychotherapist could monitor difficulties and progress in the use of CR, and promote the  
4 transfer of strategy into everyday life of the patient.  
5

6  
7 Building on the results from the present RCT, future investigations could additionally consider transfer  
8 effects to CR tasks other than the training tasks or to CR abilities in daily life e.g., based on ecological  
9 momentary assessment. Moreover, as a next step, it would be worthwhile to assess whether this training  
10 might prove effective in patients with other psychiatric disorders which are also characterized by  
11 deficient ER abilities, such as anxiety disorders and eating disorders.[68]  
12  
13

14  
15 A limiting factor of the study is the short follow-up interval of two weeks. Thus, future studies should  
16 include a longer follow-up interval to also examine whether the effects of the training are long-lasting.  
17  
18 Another limitation is that the study is single-blinded (participant-blinded) concerning the allocation to  
19 the CR training vs. control training. This single-blinding procedure entails the risk that the experimenters  
20 will transfer their expectations to the participants. However, as the participants will perform a  
21 comprehensive practice training that is guided by the experimenter, double-blinding would not be  
22 feasible. Finally, it should be stated the present study does not include the ecological momentary  
23 assessment of outcome measures. Expanding upon the present study, it would be important to also apply  
24 experience sampling methods in future work to be able to draw comprehensive conclusions regarding  
25 transfer effects of the CR training to daily live. Despite these caveats, the results of our study will be an  
26 important step towards larger scale, multi-center RCTs in MD adolescents to investigate whether a CR  
27 training increases the efficacy of standard treatments. Furthermore, the study will elucidate  
28 neurobiological changes that occur during training and whether these are linked to changes in training  
29 outcome. To this end, our protocol may also aid to identify potential biomarkers for monitoring and  
30 predicting treatment success and thereby spark further research into the direction of individualized  
31 treatment adaptation based on neurobiological parameters.  
32  
33  
34  
35  
36  
37  
38  
39  
40  
41  
42  
43  
44  
45  
46  
47  
48  
49  
50  
51  
52  
53  
54  
55  
56  
57  
58  
59  
60

## Ethics approval

Written informed consent/assent will be taken by the participating adolescents and their parents/legal custodians. The study protocol and the template informed consent/assent forms were approved (including two amendments) by the institutional review board of the local ethics committee (Ludwig-Maximilians-University Medical Division Ethics Committee, Munich, Germany; study ID: 63-16) on 30<sup>th</sup> January 2019.

## Dissemination

Study results will be presented at national and international conferences and published in peer-reviewed publications. Moreover, the participants and their parents will receive a summary of the study results in layman's language.

## Abbreviations

BAPS-Ado: Besançon Affective Picture Set-Adolescents; BAPS-Adult: Besançon Affective Picture Set-Adults; BDI-II: Beck depression inventory; CBCL 6-18R: Child Behavior Checklist for the ages 6-18; CFT-20-R (revidierte Grundintelligenztest Skala 2): Culture fair intelligence test; CBT: Cognitive-behavioral therapy; CR: Cognitive reappraisal; DFG (Deutsche Forschungsgemeinschaft): German Research Foundation; FEEL-KJ (Fragebogen zur Erhebung der Emotionsregulation bei Kindern und Jugendlichen): Questionnaire for the assessment of emotion regulation in children and adolescents; IAPS: International Affective Picture System; ICD-10: International Statistical Classification of Diseases and Related Health Problems 10<sup>th</sup> Revision; IQ: Intelligence Quotient; Kinder-DIPS (Diagnostisches Interview bei psychischen Störungen im Kindes- und Jugendalter): Diagnostic interview for psychiatric disorders for children and adolescents; LMU: Ludwig-Maximilians University; LPP: Late Positive Potential; MD: Major depression; PANAS-C-SF: Negative Affect Scale and Positive Affect Scale for Children Shortened Version for Children Shortened Version; PSS-10: Perceived Stress Scale 10; RSQ-D: German Version of the Response Styles Questionnaire; SAM: self-assessment manikin rating scale; SES-17: Social Desirability Scale; SPIRIT: Standard protocol items: recommendations for interventional trials; STAI: State-Trait-Anxiety Inventory; TAP (Testbatterie zur Aufmerksamkeitsprüfung): Test battery for executive functions; WISC-V: Wechsler Intelligence Scale for Children - Fifth Edition.

## Declarations

### Consent for publication

This manuscript does not contain any form of individual person's data, all data will be reported based on aggregated group data.

### Availability of data and material

The datasets generated and/or analyzed during the current study are not publicly available due to sensitive patient information, such as sociodemographic information, birth date and comorbidities, but aggregated group data can be made available upon request.

### Competing interests statement

The authors declare that they have no competing financial or non-financial interests.

### Funding

This work was supported by the Deutsche Forschungsgemeinschaft (DFG, German Research Foundation) – Grant GR4753/2-1 to E.G. The funding body played no role in the design of the study or writing of the manuscript or the decision to submit the report for publication.

### Authors' contributions

EG, LF, GSK and CP contributed to the study design. Data management will be conducted by LF and EG and data analysis and interpretation will be performed by LF, EG, FO, GSK, JB, MSR and CP. EG and LF wrote the study protocol. All authors read and critically revised the draft of the paper and approved the final version of this manuscript.

### Acknowledgements

We are grateful to Carolin Zsigo for the assistance during the implementation of the experiment. We wish to thank Petra Wagenbüchler for her assistance in data collection. We further would like to thank Dr. Lauriane Vulliez and Dr. Monika Szymanska for providing BAPS-Ado and BAPS-Adult picture sets.

### Trial Sponsor

Department of Child and Adolescent Psychiatry, Psychosomatics and Psychotherapy, University Hospital, LMU Munich (Primary Sponsor)  
Nussbaumstraße 5a  
80336 Munich  
Germany  
Contact Name: PD Dr. Ellen Greimel (Principal Investigator & Contact for Public/Scientific Queries)  
Phone: +49 89 4400 56952  
Email: ellen.greimel@med.uni-muenchen.de

## References

1. Kessler RC, Bromet EJ. The epidemiology of depression across cultures. *Annu Rev Publ Health*. 2013;34:119-38.
2. Avenevoli S, Knight E, Kessler RC, Merikangas KR. Epidemiology of depression in children and adolescents. In: Abela JRZ, Hankin BL, editors. *Handbook of depression in children and adolescents*. New York: Guilford; 2008. p. 6-32.
3. Kovacs M, Yaroslavsky I. Practitioner review: Dysphoria and its regulation in child and adolescent depression. *J Child Psychol Psychiatry*. 2014;55(7):741-57.
4. Ochsner KN, Gross JJ. The cognitive control of emotion. *Trends Cogn Sci*. 2005;9(5):242-9.
5. Ahmed SP, Bittencourt-Hewitt A, Sebastian CL. Neurocognitive bases of emotion regulation development in adolescence. *Dev Cogn Neurosci*. 2015;15:11-25.
6. Compton SN, March JS, Brent D, Albano AM, Weersing VR, Curry J. Cognitive-behavioral psychotherapy for anxiety and depressive disorders in children and adolescents: an evidence-based medicine review. *J Am Acad Child Psy*. 2004;43(8):930-59.
7. Curry J, Rohde P, Simons A, Silva S, Vitiello B, Kratochvil C, et al. Predictors and moderators of acute outcome in the Treatment for Adolescents with Depression Study (TADS). *J Am Acad Child Psy*. 2006;45(12):1427-39.
8. Thapar A, Collishaw S, Pine DS, Thapar AK. Depression in adolescence. *Lancet*. 2012;379(9820):1056-67.
9. Berking M, Ebert D, Cuijpers P, Hofmann SG. Emotion regulation skills training enhances the efficacy of inpatient cognitive behavioral therapy for major depressive disorder: a randomized controlled trial. *Psychother Psychosom*. 2013;82:234-45.
10. Berking M, Wupperman P, Reichardt A, Pejic T, Dippel A, Znoj H. Emotion-regulation skills as a treatment target in psychotherapy. *Behav Res Ther*. 2008;46:1230-7.
11. Cutuli D. Cognitive reappraisal and expressive suppression strategies role in the emotion regulation: an overview on their modulatory effects and neural correlates. *Front Syst Neurosci*. 2014;8:175.
12. Garnefski N, Kraaij V. The cognitive emotion regulation questionnaire: Psychometric Features and Prospective Relationships with Depression and Anxiety in Adults. *Eur J Psychol Assess*. 2007;23(3):141-9.
13. Joormann J, Gotlib IH. Emotion regulation in depression: relation to cognitive inhibition. *Cognition Emotion*. 2010;24(2):281-98.
14. Schäfer JÖ, Naumann E, Holmes EA, Tuschen-Caffier B, Samson AC. Emotion regulation strategies in depressive and anxiety symptoms in youth: A meta-analytic review. *J Youth Adolescence*. 2017;46(2):261-76.
15. Cohen N, Daches S, Mor N, Henik A. Inhibition of negative content - a shared process in rumination and reappraisal. *Front Psychol*. 2014; 5: 622.
16. Dillon DG, Pizzagalli DA. Evidence of successful modulation of brain activation and subjective experience during reappraisal of negative emotion in unmedicated depression. *Psychiatry Res Neuroimaging*. 2013;212(2):99-107.
17. Sheline YI, Barch DM, Price JL, Rundle MM, Vaishnavi SN, Snyder AZ, et al. The default mode network and self-referential processes in depression. *P Natl Acad Sci*. 2009;106(6):1942-7.
18. Zilverstand A, Parvaz MA, Goldstein RZ. Neuroimaging cognitive reappraisal in clinical populations to define neural targets for enhancing emotion regulation. A systematic review. *Neuroimage*. 2017;151:105-16.
19. Greimel E, Schulte-Ruether M, Fink GR, Piefke M, Herpertz-Dahlmann B, Konrad K. Development of neural correlates of empathy from childhood to early adulthood: an fMRI study in boys and adult men. *J Neural Transm*. 2010;117(6):781-91.
20. DeCicco JM, O'Toole LJ, Dennis TA. The late positive potential as a neural signature for cognitive reappraisal in children. *Dev Neuropsychol*. 2014;39(7):497-515.



- 1
- 2
- 3 21. Moser JS, Krompinger JW, Dietz J, Simons RF. Electrophysiological correlates of decreasing
- 4 and increasing emotional responses to unpleasant pictures. *Psychophysiology*. 2009;46:17-27.
- 5 22. Paul S, Simon D, Kniesche R, Kathmann N, Endrass T. Timing effects of antecedent-and
- 6 response-focused emotion regulation strategies. *Biol Psychol*. 2013;94(1):136-42.
- 7 23. Dennis TA, Hajcak G. The late positive potential: a neurophysiological marker for emotion
- 8 regulation in children. *J Child Psychol Psych*. 2009;50(11):1373-83.
- 9 24. Wessing I, Rehbein MA, Romer G, Achtergarde S, Dobel C, Zwitserlood P, et al. Cognitive
- 10 emotion regulation in children: reappraisal of emotional faces modulates neural source activity in a
- 11 frontoparietal network. *Dev Cogn Neurosci*. 2015;13:1-10.
- 12 25. Bylsma LM. Emotional Reactivity and Regulation in Current and Remitted Depression: An
- 13 Event Related Potential Study [Dissertation]: University of South Florida; 2012.
- 14 26. Kudinova AY, Owens M, Burkhouse KL, Barretto KM, Bonanno GA, Gibb BE. Differences in
- 15 emotion modulation using cognitive reappraisal in individuals with and without suicidal ideation: An
- 16 ERP study. *Cognition Emotion*. 2016;30(5):999-1007.
- 17 27. Bebkco GM, Franconeri SL, Ochsner KN, Chiao JY. Attentional deployment is not necessary for
- 18 successful emotion regulation via cognitive reappraisal or expressive suppression. *Emotion*.
- 19 2014;14(3):504-12.
- 20 28. Manera V, Samson AC, Pehrs C, Lee IA, Gross JJ. The eyes have it: The role of attention in
- 21 cognitive reappraisal of social stimuli. *Emotion*. 2014;14(5):833-9.
- 22 29. Strauss GP, Ossenfort KL, Whearty KM. Reappraisal and distraction emotion regulation
- 23 strategies are associated with distinct patterns of visual attention and differing levels of cognitive
- 24 demand. *Plos One*. 2016;11(11):e0162290.
- 25 30. Denny BT, Ochsner KN. Behavioral effects of longitudinal training in cognitive reappraisal.
- 26 *Emotion*. 2014;14(2):425-33.
- 27 31. De Witte NA, Sütterlin S, Braet C, Mueller SC. Psychophysiological correlates of emotion
- 28 regulation training in adolescent anxiety: Evidence from the novel PIER task. *J Affect Disord*.
- 29 2017;214:89-96.
- 30 32. World Health Organization. The ICD-10 classification of mental and behavioural disorders:
- 31 clinical descriptions and diagnostic guidelines: Geneva: World Health Organization; 1992.
- 32 33. Schönfelder S, Kanske P, Heissler J, Wessa M. Time course of emotion-related responding
- 33 during distraction and reappraisal. *SCAN*. 2014;9(9):1310-9.
- 34 34. Paul S, Simon D, Endrass T, Kathmann N. Altered emotion regulation in obsessive-compulsive
- 35 disorder as evidenced by the late positive potential. *Psychol Med*. 2016;46(1):137-47.
- 36 35. Sarlo M, Ubel S, Leutgeb V, Schienle A. Cognitive reappraisal fails when attempting to reduce
- 37 the appetitive value of food: an ERP study. *Biol Psychol*. 2013;94(3):507-12.
- 38 36. Greimel E, Piechaczek C, Schulte-Rüther M, Feldmann L, Schulte-Körne G. The role of
- 39 attentional deployment during distancing in adolescents with major depression. *BRAT*.
- 40 2020;126:103554.
- 41 37. Bradley MM, Lang PJ. Measuring emotion: the self-assessment manikin and the semantic
- 42 differential. *J Behav Ther Exp Psy*. 1994;25(1):49-59.
- 43 38. Suk H-J. Color and Emotion-a study on the affective judgment across media and in relation to
- 44 visual stimuli [Dissertation]: Universität Mannheim; 2006.
- 45 39. Lang PJ. Behavioral treatment and bio-behavioral assessment: Computer applications. In:
- 46 Sidowski JB, Johnson JH, Williams TA, editors. *Technology in mental health care delivery systems*.
- 47 Norwood, NJ: Ablex; 1980. p. 119-37.
- 48 40. Musser ED, Galloway-Long HS, Frick PJ, Nigg JT. Emotion regulation and heterogeneity in
- 49 attention-deficit/hyperactivity disorder. *J Am Acad Child Adolesc Psychiatry*. 2013;52(2):163-71.e2.
- 50 41. Reichel VA, Schneider N, Grünewald B, Kienast T, Pfeiffer E, Lehmkuhl U, et al. "Glass fairies"
- 51 and "bone children": Adolescents and young adults with anorexia nervosa show positive reactions
- 52 towards extremely emaciated body pictures measured by the startle reflex paradigm.
- 53 *Psychophysiology*. 2014;51(2):168-77.
- 54
- 55
- 56
- 57
- 58
- 59
- 60



- 1
  - 2
  - 3
  - 4
  - 5
  - 6
  - 7
  - 8
  - 9
  - 10
  - 11
  - 12
  - 13
  - 14
  - 15
  - 16
  - 17
  - 18
  - 19
  - 20
  - 21
  - 22
  - 23
  - 24
  - 25
  - 26
  - 27
  - 28
  - 29
  - 30
  - 31
  - 32
  - 33
  - 34
  - 35
  - 36
  - 37
  - 38
  - 39
  - 40
  - 41
  - 42
  - 43
  - 44
  - 45
  - 46
  - 47
  - 48
  - 49
  - 50
  - 51
  - 52
  - 53
  - 54
  - 55
  - 56
  - 57
  - 58
  - 59
  - 60
42. Patrick CJ, Lavoro SA. Ratings of emotional response to pictorial stimuli: Positive and negative affect dimensions. *Motiv Emotion*. 1997;21(4):297-321.
43. Lang PJ, Bradley MM, Cuthbert BN. International affective picture system (IAPS): Affective ratings of pictures and instruction manual. Technical Report A-8. Gainesville, FL: University of Florida; 2008.
44. Szymanska M, Monnin J, Noiret N, Tio G, Galdon L, Laurent E, et al. The Besançon affective picture set-adolescents (the BAPS-Ado): development and validation. *Psychiatry Res*. 2015;228(3):576-84.
45. Szymanska M, Comte A, Tio G, Vidal C, Monnin J, Smith CC, et al. The Besançon affective picture set-adult (BAPS-Adult): Development and validation. *Psychiatry Res*. 2019;271:31-8.
46. Margraf J, Cwik JC, Pflug V, Schneider S. Structured clinical interviews for mental disorders across the lifespan: Psychometric quality and further developments of the DIPS Open Access interviews. [Strukturierte klinische Interviews zur Erfassung psychischer Störungen über die Lebensspanne: Gütekriterien und Weiterentwicklungen der DIPS-Verfahren.]. *Z Klin Psychol Psychopathol Psychother*. 2017;46(3):176-86.
47. Margraf J, Cwik JC, Suppiger A, Schneider S. DIPS Open Access: Diagnostic Interview for Mental Disorders. [DIPS Open Access: Diagnostisches Interview bei psychischen Störungen.] Bochum: Mental Health Research and Treatment Center; 2017.
48. Weiß RH. CFT 20-R, Grundintelligenztest Skala 2 - Revision (2. Auflage)2019.
49. Wechsler D. Wechsler Intelligence Scale for Children—Fifth Edition (WISC-V). Frankfurt/Main, Nürnberg, Leipzig: Pearson; 2017.
50. Kühner C, Huffziger S, Nolen-Hoeksema S. Response Styles Questionnaire-Deutsche Version: RSQ-D; Manual: Hogrefe; 2007.
51. Hautzinger M, Keller F, Kühner C. Das Beck Depressionsinventar II. Deutsche Bearbeitung und Handbuch zum BDI-II. Frankfurt am Main: Harcourt Test Services; 2006.
52. Cohen S, Kamarck T, Mermelstein R. A global measure of perceived stress. *J Health Soc Behav*. 1983;24(4):385-96.
53. Ebesutani C, Regan J, Smith A, Reise S, Higa-McMillan C, Chorpita BF. The 10-Item Positive and Negative Affect Schedule for Children, Child and Parent Shortened Versions: Application of Item Response Theory for More Efficient Assessment. *J Psychopathol Behav*. 2012;34(2):191-203.
54. Stöber J. Die Soziale-Erwünschtheits-Skala-17 (SES-17): Entwicklung und erste Befunde zu Reliabilität und Validität. *Diagnostica*. 1999;45(4):173-7.
55. Koster EH, De Lissnyder E, Derakshan N, De Raedt R. Understanding depressive rumination from a cognitive science perspective: The impaired disengagement hypothesis. *Clin Psychol Rev*. 2011;31(1):138-45.
56. Sanchez-Lopez A, Everaert J, Van Put J, De Raedt R, Koster EHW. Eye-gaze contingent attention training (ECAT): Examining the causal role of attention regulation in reappraisal and rumination. *Biol Psychol*. 2019;142:116-25.
57. Cohen N, Ochsner KN. From surviving to thriving in the face of threats: the emerging science of emotion regulation training. *Curr Opin Behav Sci*. 2018;24:143-55.
58. Miyake A, Friedman NP, Emerson MJ, Witzki AH, Howerter A, Wager TD. The unity and diversity of executive functions and their contributions to complex “frontal lobe” tasks: A latent variable analysis. *Cognitive Psychol*. 2000;41(1):49-100.
59. Friedman NP, Miyake A, Young SE, DeFries JC, Corley RP, Hewitt JK. Individual differences in executive functions are almost entirely genetic in origin. *J Exp Psychol Gen*. 2008;137(2):201-25.
60. Zimmermann P, Fimm B. TAP Testbatterie zur Aufmerksamkeitsprüfung Version 2.3: Vera Fimm, Psychologische Testsysteme; 2012.
61. Grob A, Smolenski C. Fragebogen zur Erhebung der Emotionsregulation bei Kindern und Jugendlichen (FEEL-KJ). 2. Aktualisierte und ergänzte Auflage. Bern: Huber Verlag; 2009.
62. Axelson DA, Birmaher B. Relation between anxiety and depressive disorders in childhood and adolescence. *Depress Anxiety*. 2001;14(2):67-78.

- 1  
2  
3 63. Laux L, Glanzmann P, Schaffner P, Spielberger C. Das State-Trait-Angstinventar Weinheim, Germany: Beltz; 1981.
- 4  
5 64. Döpfner M, Achenbach TM, Plück J, Kinnen C, Plück J. CBCL/6-18R-TRF/6-18R-YSR/11-18R: Deutsche Schulalter-Formen der Child Behavior Checklist von Thomas M. Achenbach:  
6  
7 Elternfragebogen über das Verhalten von Kindern und Jugendlichen (CBCL/6-18R), Lehrerfragebogen  
8 über das Verhalten von Kindern und Jugendlichen (TRF/6-18R), Fragebogen für Jugendliche (YSR/11-  
9 18R). Göttingen: Hogrefe; 2014.
- 10  
11 65. Moran TP, Jendrusina AA, Moser JS. The psychometric properties of the late positive  
12 potential during emotion processing and regulation. *Brain Res.* 2013;1516:66-75.
- 13 66. Siegle GJ, Price RB, Jones NP, Ghinassi F, Painter T, Thase ME. You gotta work at it: Pupillary  
14 indices of task focus are prognostic for response to a neurocognitive intervention for rumination in  
15 depression. *Clin Psychol Sci.* 2014;2(4):455-71.
- 16  
17 67. Murrar S, Brauer M. Mixed model analysis of variance. In: Frey BB, editor. The SAGE  
18 encyclopedia of educational research, measurement, and evaluation. Thousand Oaks: SAGE  
19 Publications, Inc.; 2018. p. 1075-8.
- 20  
21 68. Aldao A, Nolen-Hoeksema S, Schweizer S. Emotion-regulation strategies across  
22 psychopathology: A meta-analytic review. *Clin Psychol Rev.* 2010;30(2):217-37.
- 23 69. Adornetto C, In-Albon T, Schneider S. Diagnostik im Kindes- und Jugendalter anhand  
24 strukturierter Interviews: Anwendung und Durchführung des Kinder-DIPS. *Klin Diagnostik u*  
25 *Evaluation.* 2008;1(4):363-77.
- 26  
27 70. Dolle K, Schulte-Körne G, O'Leary AM, von Hofacker N, Izat Y, Allgaier A-K. The Beck  
28 Depression Inventory-II in adolescent mental health patients: Cut-off scores for detecting depression  
29 and rating severity. *Psychiat Research.* 2012;200(2-3):843-8.
- 30  
31 71. Stockings E, Degenhardt L, Lee YY, Mihalopoulos C, Liu A, Hobbs M, et al. Symptom screening  
32 scales for detecting major depressive disorder in children and adolescents: a systematic review and  
33 meta-analysis of reliability, validity and diagnostic utility. *J Affect Disorders.* 2015;174:447-63.
- 34  
35 72. Löwe B, Kroenke K, Gräfe K. Detecting and monitoring depression with a two-item  
36 questionnaire (PHQ-2). *J Psychosom Res.* 2005;58(2):163-71.
- 37  
38 73. Klein EM, Brähler E, Dreier M, Reinecke L, Müller KW, Schmutz G, et al. The German version  
39 of the Perceived Stress Scale—psychometric characteristics in a representative German community  
40 sample. *BMC Psychiatry.* 2016;16:159.
- 41  
42 74. Conway M, Csank PA, Holm SL, Blake CK. On assessing individual differences in rumination on  
43 sadness. *J Pers Assess.* 2000;75(3):404-25.
- 44  
45 75. Stöber J. The Social Desirability Scale-17 (SDS-17): Convergent validity, discriminant validity,  
46 and relationship with age. *Eur J Psychol Assess.* 2001;17(3):222-32.
- 47  
48  
49  
50  
51  
52  
53  
54  
55  
56  
57  
58  
59  
60

**Table 1.** Overview over diagnostic measures and all variables of the study

| Function               | Measure                      | Instrument            | Reliability/Validity                                                                                                                                                                                                                                                                   | T0 Baseline/<br>Diagnostics | T1 | T2 | T3 | T4 | 2-week Follow-up |
|------------------------|------------------------------|-----------------------|----------------------------------------------------------------------------------------------------------------------------------------------------------------------------------------------------------------------------------------------------------------------------------------|-----------------------------|----|----|----|----|------------------|
| <b>Diagnostic</b>      | Diagnosis                    | Kinder-DIPS (A)       | Retest-Reliability for depressive disorders=.95 (Kappa) for the predecessor version of the Kinder-Dips for DSM-IV diagnoses in children and adolescents[69]                                                                                                                            | X                           |    |    |    |    |                  |
|                        | Intelligence quotient (IQ)   | CFT-20-R (A) (part 1) | Cronbach's $\alpha$ =.92 for the first part in children, adolescents and adults[48]                                                                                                                                                                                                    | X                           |    |    |    |    |                  |
| <b>Primary Outcome</b> | Depressive Symptoms          | BDI-II (A)            | Cronbach's $\alpha$ =.94 in an adolescent population[70]; pooled estimate for internal reliability: .86; discriminative validity - pooled estimate for sensitivity and specificity: .81; based on meta-analytic data in non-clinical and clinical child and adolescent populations[71] | X                           |    |    |    | X  |                  |
|                        | Negative and positive Affect | PANAS-C-SF (A)        | Cronbach's $\alpha$ =.86 for positive affect scale and Cronbach's $\alpha$ =.82 for negative affect scale; divergent validity - correlation between positive and negative affect scales: -.13; based on data in an adolescent population[53]                                           |                             | X  | X  | X  | X  | X                |
|                        | Perceived Stress             | PSS-10 (A)            | Cronbach's $\alpha$ =.84; construct validity of .59 with the PHQ-2 [Patient Health Questionnaire; 72]; based on a sample of adolescents and adults for the original version of the PSS-10[73]                                                                                          |                             | X  | X  | X  | X  | X                |
|                        | Rumination                   | RSQ-D (A)             | Cronbach's $\alpha$ =.77 for self-focused rumination scale and Cronbach's                                                                                                                                                                                                              | X                           |    |    |    | X  | X                |

|                              |                                                                         |                                                                                                     |                                                                                                                                                                                                                                  |   |   |   |   |   |  |
|------------------------------|-------------------------------------------------------------------------|-----------------------------------------------------------------------------------------------------|----------------------------------------------------------------------------------------------------------------------------------------------------------------------------------------------------------------------------------|---|---|---|---|---|--|
|                              |                                                                         |                                                                                                     | $\alpha=.88$ for symptom-focused rumination; convergent validity of .52 for symptom-focused rumination and .72 for self-focused rumination with the RSS [Rumination on Sadness Scale; 74]; based on depressed adult patients[50] |   |   |   |   |   |  |
| <b>Secondary Outcome</b>     | Affective behavioral responses to pictures                              | SAM Rating Scale (A) of valence                                                                     | Cronbach's $\alpha$ for SAM ratings of the stimuli applied in the current study will be calculated based on the present sample                                                                                                   |   | X | X | X | X |  |
|                              | LPP (Late Positive Potential)                                           | (A)                                                                                                 | n.a.                                                                                                                                                                                                                             |   | X | X | X | X |  |
|                              | Gaze fixations in emotional areas of interest                           | (A)                                                                                                 | n.a.                                                                                                                                                                                                                             |   | X | X | X | X |  |
| <b>Confounding Variables</b> | Social Desirability                                                     | SES-17 (A)                                                                                          | Cronbach's $\alpha=.78$ in a young adult population[54, 75]                                                                                                                                                                      | X |   |   |   |   |  |
| <b>Mediators</b>             | State rumination during training                                        | Questionnaire (A) applied in A Sanchez-Lopez, J Everaert, J Van Put, R De Raedt and EHW Koster [56] | Cronbach's $\alpha=.72$ to .73; based on data in a young adult population[56]                                                                                                                                                    |   | X | X | X | X |  |
|                              | Habitual emotion regulation strategies                                  | FEEL-KJ (A)                                                                                         | Cronbach's $\alpha=.93$ for Adaptive emotion regulation scale and Cronbach's $\alpha=.82$ for Maladaptive emotion regulation scale in children and adolescents[61]                                                               | X |   |   |   |   |  |
|                              | Executive Function abilities (Set shifting, Working Memory, Inhibition) | TAP 2.3 (A)                                                                                         | Odd-even- Reliability for reaction times in adolescents: .791 for working memory, .952 for flexibility, .911 for Go/nogo for trials applied in the current study[60]                                                             | X |   |   |   |   |  |

|                   |                         |                |                                                                                                                          |   |  |  |  |  |  |
|-------------------|-------------------------|----------------|--------------------------------------------------------------------------------------------------------------------------|---|--|--|--|--|--|
| <b>Moderators</b> | Trait and state anxiety | STAI (A)       | Cronbach's $\alpha=.91$ for STAI-S scale and Cronbach's $\alpha\geq.89$ for STAI-T scale in adolescents/young adults[63] | X |  |  |  |  |  |
|                   | Psychopathology         | CBCL 6-18R (P) | Cronbach's $\alpha=.93$ for total behavior problem scale based on a sample of children and adolescents[64]               | X |  |  |  |  |  |

**Note.** Applied to A=Adolescent P=Parent; Abbreviations: Kinder-DIPS (Diagnostisches Interview bei psychischen Störungen im Kindes- und Jugendalter): Diagnostic interview for psychiatric disorders for children and adolescents; CFT-20-R (revidierte Grundintelligenztest Skala 2): Culture fair intelligence test; BDI-II: Beck depression inventory; PANAS-C-SF: Negative Affect Scale and Positive Affect Scale for Children Shortened Version for Children Shortened Version; PSS-10: Perceived Stress Scale 10; RSQ-D: German Version of the Response Styles Questionnaire; SAM: self-assessment manikin rating scale; n.a.: not applicable; SES-17: Social Desirability Scale; FEEL-KJ (Fragebogen zur Erhebung der Emotionsregulation bei Kindern und Jugendlichen): Questionnaire for the assessment of emotion regulation in children and adolescents; TAP (Testbatterie zur Aufmerksamkeitsprüfung): Test battery for executive functions; STAI: State-Trait-Anxiety Inventory; CBCL 6-18R: Child Behavior Checklist for the ages 6-18.

1  
2  
3  
4  
5  
6  
7  
8  
9  
10  
11  
12  
13  
14  
15  
16  
17  
18  
19  
20  
21  
22  
23  
24  
25  
26  
27  
28  
29  
30  
31  
32  
33  
34  
35  
36  
37  
38  
39  
40  
41  
42  
43  
44  
45  
46  
47  
48  
49  
50  
51  
52  
53  
54  
55  
56  
57  
58  
59  
60

## Figure Legends

**Figure 1.** Overview of the KONNI study design

**Figure 2.** Experimental time course. Exemplary illustration of a trial belonging to the CR training (negative-reappraise condition). The picture shown is exemplary and not part of the picture databases used in the study. Abbreviations: SAM: self-assessment manikin rating scale (as a portrait version).

1  
2  
3  
4  
5  
6  
7  
8  
9  
10  
11  
12  
13  
14  
15  
16  
17  
18  
19  
20  
21  
22  
23  
24  
25  
26  
27  
28  
29  
30  
31  
32  
33  
34  
35  
36  
37  
38  
39  
40  
41  
42  
43  
44  
45  
46  
47  
48  
49  
50  
51  
52  
53  
54  
55  
56  
57  
58  
59  
60

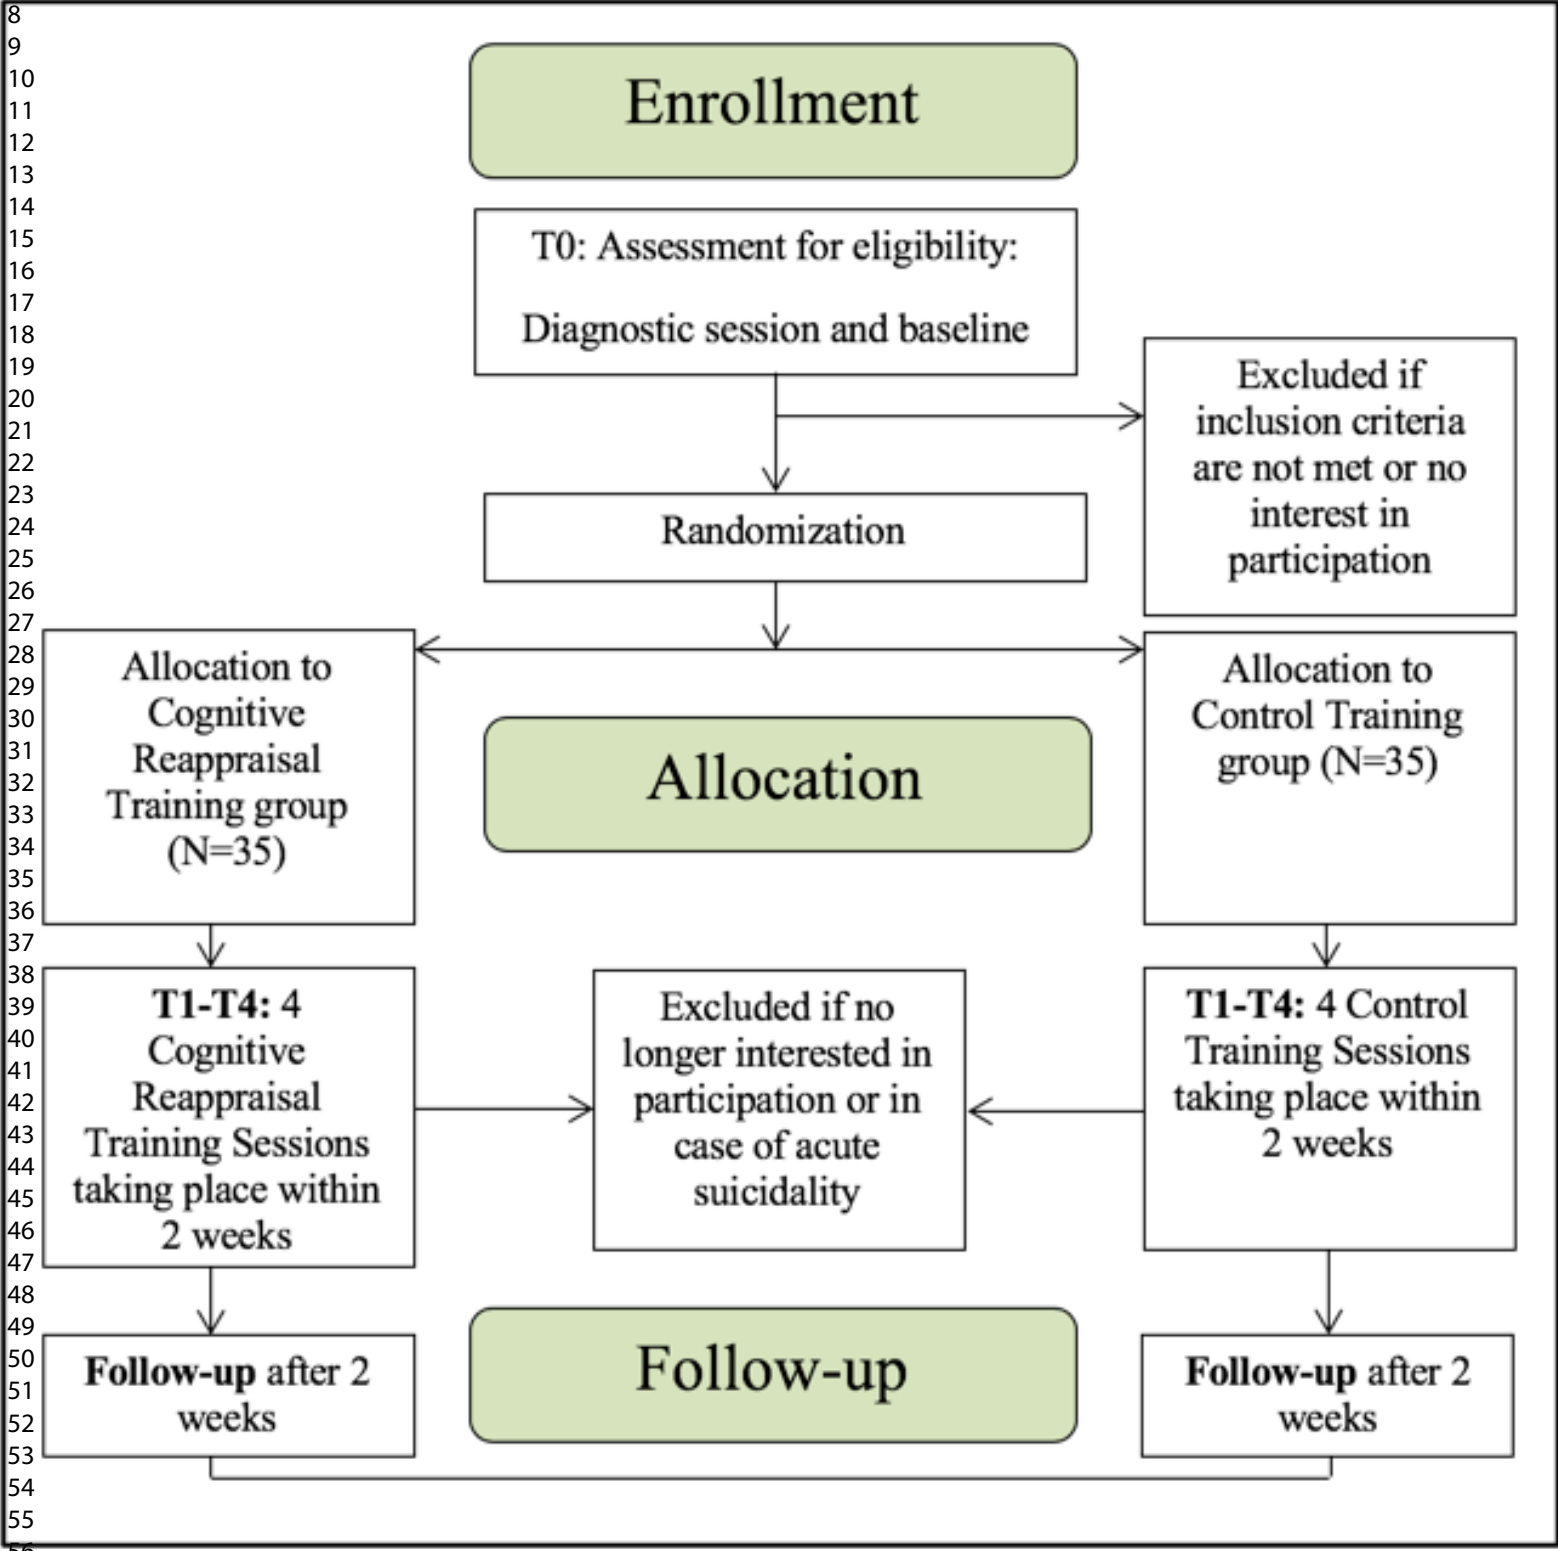

1  
2  
3  
4  
5  
6  
7  
8  
9  
10  
11  
12  
13  
14  
15  
16  
17  
18  
19  
20  
21  
22  
23  
24  
25  
26  
27  
28  
29  
30  
31  
32  
33  
34  
35  
36  
37  
38  
39  
40  
41  
42  
43  
44  
45  
46  
47  
48  
49  
50  
51  
52  
53  
54  
55  
56  
57  
58  
59  
60

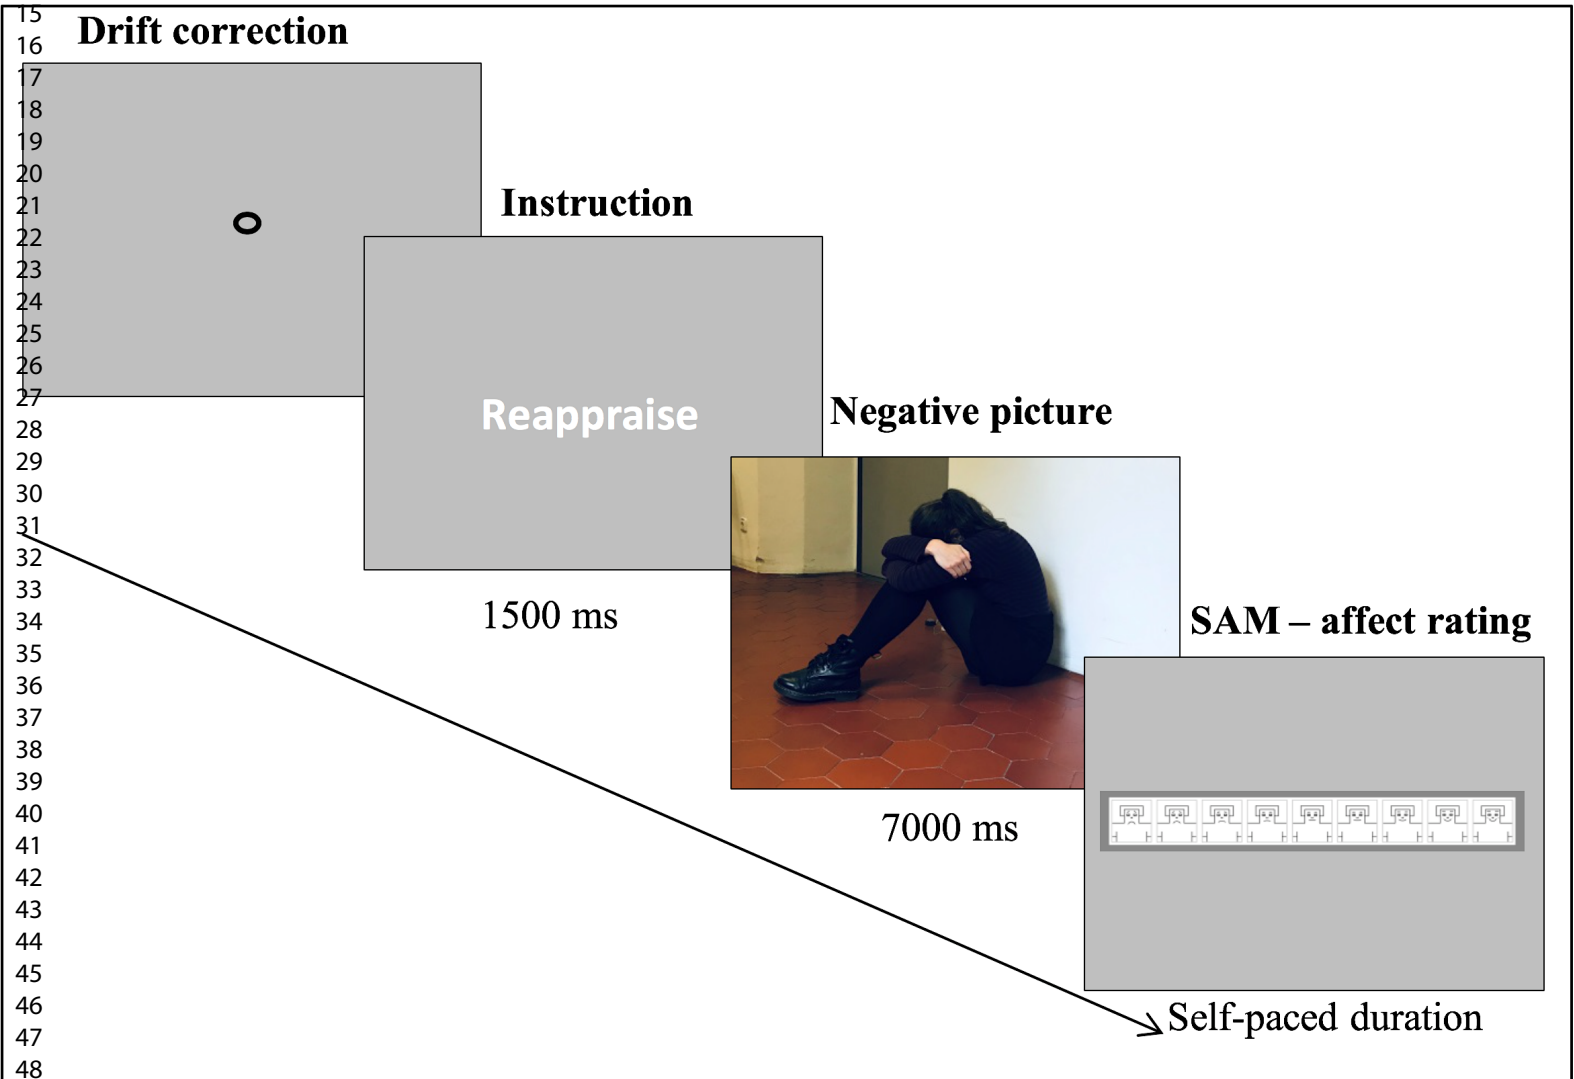



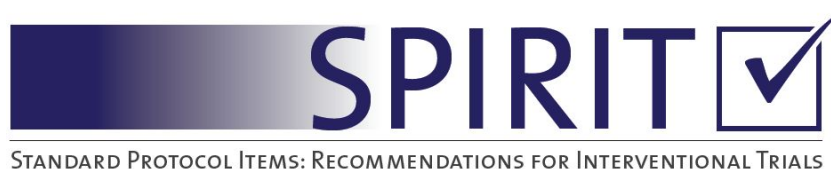

STANDARD PROTOCOL ITEMS: RECOMMENDATIONS FOR INTERVENTIONAL TRIALS

SPIRIT 2013 Checklist: Recommended items to address in a clinical trial protocol and related documents\*

| Section/item                      | Item No | Description                                                                                                                                                                                                                                                                                                                                                    |
|-----------------------------------|---------|----------------------------------------------------------------------------------------------------------------------------------------------------------------------------------------------------------------------------------------------------------------------------------------------------------------------------------------------------------------|
| <b>Administrative information</b> |         |                                                                                                                                                                                                                                                                                                                                                                |
| Title                             | 1       | Descriptive title identifying the study design, population, interventions, and, if applicable, trial acronym ( <b>p. 1 Title</b> )                                                                                                                                                                                                                             |
| Trial registration                | 2a      | Trial identifier and registry name. If not yet registered, name of intended registry ( <b>p. 2 “Trial Registration”</b> )                                                                                                                                                                                                                                      |
|                                   | 2b      | All items from the World Health Organization Trial Registration Data Set ( <b>throughout the entire study protocol</b> )                                                                                                                                                                                                                                       |
| Protocol version                  | 3       | Date and version identifier ( <b>n.a., first version of the protocol</b> )                                                                                                                                                                                                                                                                                     |
| Funding                           | 4       | Sources and types of financial, material, and other support ( <b>p. 18, section “funding”</b> )                                                                                                                                                                                                                                                                |
| Roles and responsibilities        | 5a      | Names, affiliations, and roles of protocol contributors ( <b>p. 18, section “author’s contributions”</b> )                                                                                                                                                                                                                                                     |
|                                   | 5b      | Name and contact information for the trial sponsor ( <b>p. 18, section “trial sponsor”</b> )                                                                                                                                                                                                                                                                   |
|                                   | 5c      | Role of study sponsor and funders, if any, in study design; collection, management, analysis, and interpretation of data; writing of the report; and the decision to submit the report for publication, including whether they will have ultimate authority over any of these activities ( <b>p. 18, section “funding”</b> )                                   |
|                                   | 5d      | Composition, roles, and responsibilities of the coordinating centre, steering committee, endpoint adjudication committee, data management team, and other individuals or groups overseeing the trial, if applicable (see Item 21a for data monitoring committee) ( <b>n.a.</b> )                                                                               |
| <b>Introduction</b>               |         |                                                                                                                                                                                                                                                                                                                                                                |
| Background and rationale          | 6a      | Description of research question and justification for undertaking the trial, including summary of relevant studies (published and unpublished) examining benefits and harms for each intervention ( <b>pp. 3-5; sections: “Introduction”, “Cognitive reappraisal in depressed individuals”, “Trainability of cognitive reappraisal”, “Aim of the study”</b> ) |

|    |                                                           |     |                                                                                                                                                                                                                                                                                                                                                                                                                                                    |
|----|-----------------------------------------------------------|-----|----------------------------------------------------------------------------------------------------------------------------------------------------------------------------------------------------------------------------------------------------------------------------------------------------------------------------------------------------------------------------------------------------------------------------------------------------|
| 1  |                                                           |     |                                                                                                                                                                                                                                                                                                                                                                                                                                                    |
| 2  |                                                           | 6b  | Explanation for choice of comparators ( <b>p. 9, section “Control training”</b> )                                                                                                                                                                                                                                                                                                                                                                  |
| 3  |                                                           |     |                                                                                                                                                                                                                                                                                                                                                                                                                                                    |
| 4  |                                                           |     |                                                                                                                                                                                                                                                                                                                                                                                                                                                    |
| 5  | Objectives                                                | 7   | Specific objectives or hypotheses ( <b>p. 5, section “Aim of the study”</b> )                                                                                                                                                                                                                                                                                                                                                                      |
| 6  |                                                           |     |                                                                                                                                                                                                                                                                                                                                                                                                                                                    |
| 7  | Trial design                                              | 8   | Description of trial design including type of trial (eg, parallel group, crossover, factorial, single group), allocation ratio, and framework (eg, superiority, equivalence, noninferiority, exploratory) ( <b>p. 6, section “Design”</b> )                                                                                                                                                                                                        |
| 8  |                                                           |     |                                                                                                                                                                                                                                                                                                                                                                                                                                                    |
| 9  |                                                           |     |                                                                                                                                                                                                                                                                                                                                                                                                                                                    |
| 10 |                                                           |     |                                                                                                                                                                                                                                                                                                                                                                                                                                                    |
| 11 |                                                           |     |                                                                                                                                                                                                                                                                                                                                                                                                                                                    |
| 12 |                                                           |     |                                                                                                                                                                                                                                                                                                                                                                                                                                                    |
| 13 | <b>Methods: Participants, interventions, and outcomes</b> |     |                                                                                                                                                                                                                                                                                                                                                                                                                                                    |
| 14 |                                                           |     |                                                                                                                                                                                                                                                                                                                                                                                                                                                    |
| 15 | Study setting                                             | 9   | Description of study settings (eg, community clinic, academic hospital) and list of countries where data will be collected. Reference to where list of study sites can be obtained ( <b>p. 6, section “Recruitment”</b> )                                                                                                                                                                                                                          |
| 16 |                                                           |     |                                                                                                                                                                                                                                                                                                                                                                                                                                                    |
| 17 |                                                           |     |                                                                                                                                                                                                                                                                                                                                                                                                                                                    |
| 18 |                                                           |     |                                                                                                                                                                                                                                                                                                                                                                                                                                                    |
| 19 | Eligibility criteria                                      | 10  | Inclusion and exclusion criteria for participants. If applicable, eligibility criteria for study centres and individuals who will perform the interventions (eg, surgeons, psychotherapists) ( <b>pp. 6-7, sections “Participants”, “Procedure”</b> )                                                                                                                                                                                              |
| 20 |                                                           |     |                                                                                                                                                                                                                                                                                                                                                                                                                                                    |
| 21 |                                                           |     |                                                                                                                                                                                                                                                                                                                                                                                                                                                    |
| 22 |                                                           |     |                                                                                                                                                                                                                                                                                                                                                                                                                                                    |
| 23 |                                                           |     |                                                                                                                                                                                                                                                                                                                                                                                                                                                    |
| 24 |                                                           |     |                                                                                                                                                                                                                                                                                                                                                                                                                                                    |
| 25 | Interventions                                             | 11a | Interventions for each group with sufficient detail to allow replication, including how and when they will be administered ( <b>pp. 8-9, sections “Cognitive Reappraisal Training”, “Control Training”</b> )                                                                                                                                                                                                                                       |
| 26 |                                                           |     |                                                                                                                                                                                                                                                                                                                                                                                                                                                    |
| 27 |                                                           |     |                                                                                                                                                                                                                                                                                                                                                                                                                                                    |
| 28 |                                                           |     |                                                                                                                                                                                                                                                                                                                                                                                                                                                    |
| 29 |                                                           |     |                                                                                                                                                                                                                                                                                                                                                                                                                                                    |
| 30 |                                                           | 11b | Criteria for discontinuing or modifying allocated interventions for a given trial participant (eg, drug dose change in response to harms, participant request, or improving/worsening disease) ( <b>pp. 7-8, section “Procedure”; Fig. 1</b> )                                                                                                                                                                                                     |
| 31 |                                                           |     |                                                                                                                                                                                                                                                                                                                                                                                                                                                    |
| 32 |                                                           |     |                                                                                                                                                                                                                                                                                                                                                                                                                                                    |
| 33 |                                                           |     |                                                                                                                                                                                                                                                                                                                                                                                                                                                    |
| 34 |                                                           |     |                                                                                                                                                                                                                                                                                                                                                                                                                                                    |
| 35 |                                                           | 11c | Strategies to improve adherence to intervention protocols, and any procedures for monitoring adherence (eg, drug tablet return, laboratory tests) ( <b>p. 9, section “Cognitive Reappraisal Training”</b> )                                                                                                                                                                                                                                        |
| 36 |                                                           |     |                                                                                                                                                                                                                                                                                                                                                                                                                                                    |
| 37 |                                                           |     |                                                                                                                                                                                                                                                                                                                                                                                                                                                    |
| 38 |                                                           |     |                                                                                                                                                                                                                                                                                                                                                                                                                                                    |
| 39 |                                                           |     |                                                                                                                                                                                                                                                                                                                                                                                                                                                    |
| 40 |                                                           | 11d | Relevant concomitant care and interventions that are permitted or prohibited during the trial ( <b>p. 8, section “Procedure”</b> )                                                                                                                                                                                                                                                                                                                 |
| 41 |                                                           |     |                                                                                                                                                                                                                                                                                                                                                                                                                                                    |
| 42 |                                                           |     |                                                                                                                                                                                                                                                                                                                                                                                                                                                    |
| 43 | Outcomes                                                  | 12  | Primary, secondary, and other outcomes, including the specific measurement variable (eg, systolic blood pressure), analysis metric (eg, change from baseline, final value, time to event), method of aggregation (eg, median, proportion), and time point for each outcome. Explanation of the clinical relevance of chosen efficacy and harm outcomes is strongly recommended ( <b>p. 10, sections “Primary outcomes”, “Secondary outcomes”</b> ) |
| 44 |                                                           |     |                                                                                                                                                                                                                                                                                                                                                                                                                                                    |
| 45 |                                                           |     |                                                                                                                                                                                                                                                                                                                                                                                                                                                    |
| 46 |                                                           |     |                                                                                                                                                                                                                                                                                                                                                                                                                                                    |
| 47 |                                                           |     |                                                                                                                                                                                                                                                                                                                                                                                                                                                    |
| 48 |                                                           |     |                                                                                                                                                                                                                                                                                                                                                                                                                                                    |
| 49 |                                                           |     |                                                                                                                                                                                                                                                                                                                                                                                                                                                    |
| 50 |                                                           |     |                                                                                                                                                                                                                                                                                                                                                                                                                                                    |
| 51 |                                                           |     |                                                                                                                                                                                                                                                                                                                                                                                                                                                    |
| 52 | Participant timeline                                      | 13  | Time schedule of enrolment, interventions (including any run-ins and washouts), assessments, and visits for participants. A schematic diagram is highly recommended (see Figure) ( <b>Table 1; Fig. 1</b> )                                                                                                                                                                                                                                        |
| 53 |                                                           |     |                                                                                                                                                                                                                                                                                                                                                                                                                                                    |
| 54 |                                                           |     |                                                                                                                                                                                                                                                                                                                                                                                                                                                    |
| 55 |                                                           |     |                                                                                                                                                                                                                                                                                                                                                                                                                                                    |
| 56 |                                                           |     |                                                                                                                                                                                                                                                                                                                                                                                                                                                    |
| 57 |                                                           |     |                                                                                                                                                                                                                                                                                                                                                                                                                                                    |
| 58 |                                                           |     |                                                                                                                                                                                                                                                                                                                                                                                                                                                    |
| 59 |                                                           |     |                                                                                                                                                                                                                                                                                                                                                                                                                                                    |
| 60 |                                                           |     |                                                                                                                                                                                                                                                                                                                                                                                                                                                    |

|   |             |    |                                                                         |
|---|-------------|----|-------------------------------------------------------------------------|
| 1 |             |    |                                                                         |
| 2 | Sample size | 14 | Estimated number of participants needed to achieve study objectives     |
| 3 |             |    | and how it was determined, including clinical and statistical           |
| 4 |             |    | assumptions supporting any sample size calculations ( <b>pp. 12-13,</b> |
| 5 |             |    | <b>section “Calculation of sample size”</b> )                           |
| 6 |             |    |                                                                         |
| 7 | Recruitment | 15 | Strategies for achieving adequate participant enrolment to reach        |
| 8 |             |    | target sample size ( <b>p. 6, section “Recruitment”</b> )               |
| 9 |             |    |                                                                         |

### Methods: Assignment of interventions (for controlled trials)

#### Allocation:

|    |                |     |                                                                             |
|----|----------------|-----|-----------------------------------------------------------------------------|
| 14 |                |     |                                                                             |
| 15 | Sequence       | 16a | Method of generating the allocation sequence (eg, computer-                 |
| 16 | generation     |     | generated random numbers), and list of any factors for stratification.      |
| 17 |                |     | To reduce predictability of a random sequence, details of any planned       |
| 18 |                |     | restriction (eg, blocking) should be provided in a separate document        |
| 19 |                |     | that is unavailable to those who enrol participants or assign               |
| 20 |                |     | interventions ( <b>pp. 6-7, section “Procedure”</b> )                       |
| 21 |                |     |                                                                             |
| 22 |                |     |                                                                             |
| 23 | Allocation     | 16b | Mechanism of implementing the allocation sequence (eg, central              |
| 24 | concealment    |     | telephone; sequentially numbered, opaque, sealed envelopes),                |
| 25 | mechanism      |     | describing any steps to conceal the sequence until interventions are        |
| 26 |                |     | assigned ( <b>pp. 6-7, section “Procedure”</b> )                            |
| 27 |                |     |                                                                             |
| 28 |                |     |                                                                             |
| 29 | Implementation | 16c | Who will generate the allocation sequence, who will enrol participants,     |
| 30 |                |     | and who will assign participants to interventions ( <b>pp. 6-7, section</b> |
| 31 |                |     | <b>“Procedure”</b> )                                                        |
| 32 |                |     |                                                                             |
| 33 | Blinding       | 17a | Who will be blinded after assignment to interventions (eg, trial            |
| 34 | (masking)      |     | participants, care providers, outcome assessors, data analysts), and        |
| 35 |                |     | how ( <b>p. 7, section “Procedure”</b> )                                    |
| 36 |                |     |                                                                             |
| 37 |                | 17b | If blinded, circumstances under which unblinding is permissible, and        |
| 38 |                |     | procedure for revealing a participant’s allocated intervention during       |
| 39 |                |     | the trial ( <b>p. 7, section “Procedure”</b> )                              |
| 40 |                |     |                                                                             |
| 41 |                |     |                                                                             |

### Methods: Data collection, management, and analysis

|    |                 |     |                                                                             |
|----|-----------------|-----|-----------------------------------------------------------------------------|
| 42 |                 |     |                                                                             |
| 43 |                 |     |                                                                             |
| 44 | Data collection | 18a | Plans for assessment and collection of outcome, baseline, and other         |
| 45 | methods         |     | trial data, including any related processes to promote data quality (eg,    |
| 46 |                 |     | duplicate measurements, training of assessors) and a description of         |
| 47 |                 |     | study instruments (eg, questionnaires, laboratory tests) along with         |
| 48 |                 |     | their reliability and validity, if known. Reference to where data           |
| 49 |                 |     | collection forms can be found, if not in the protocol ( <b>pp. 8-10,</b>    |
| 50 |                 |     | <b>sections Cognitive Reappraisal Training”, “Control training”</b>         |
| 51 |                 |     | <b>“Diagnostic measures”; Table 1)</b>                                      |
| 52 |                 |     |                                                                             |
| 53 |                 |     |                                                                             |
| 54 |                 | 18b | Plans to promote participant retention and complete follow-up,              |
| 55 |                 |     | including list of any outcome data to be collected for participants who     |
| 56 |                 |     | discontinue or deviate from intervention protocols ( <b>p. 7-8, section</b> |
| 57 |                 |     | <b>“Procedure”</b> )                                                        |
| 58 |                 |     |                                                                             |
| 59 |                 |     |                                                                             |
| 60 |                 |     |                                                                             |

|    |             |     |                                                                             |
|----|-------------|-----|-----------------------------------------------------------------------------|
| 1  |             |     |                                                                             |
| 2  | Data        | 19  | Plans for data entry, coding, security, and storage, including any          |
| 3  | management  |     | related processes to promote data quality (eg, double data entry;           |
| 4  |             |     | range checks for data values). Reference to where details of data           |
| 5  |             |     | management procedures can be found, if not in the protocol ( <b>p. 13,</b>  |
| 6  |             |     | <b>section “Data management and confidentiality”</b> )                      |
| 7  |             |     |                                                                             |
| 8  | Statistical | 20a | Statistical methods for analysing primary and secondary outcomes.           |
| 9  | methods     |     | Reference to where other details of the statistical analysis plan can be    |
| 10 |             |     | found, if not in the protocol ( <b>pp. 14-15, section “Statistical</b>      |
| 11 |             |     | <b>analysis”</b> )                                                          |
| 12 |             |     |                                                                             |
| 13 |             | 20b | Methods for any additional analyses (eg, subgroup and adjusted              |
| 14 |             |     | analyses) ( <b>p. 15, section “Statistical analysis”</b> )                  |
| 15 |             |     |                                                                             |
| 16 |             | 20c | Definition of analysis population relating to protocol non-adherence        |
| 17 |             |     | (eg, as randomised analysis), and any statistical methods to handle         |
| 18 |             |     | missing data (eg, multiple imputation) ( <b>p. 14, section “Statistical</b> |
| 19 |             |     | <b>analysis”</b> )                                                          |
| 20 |             |     |                                                                             |
| 21 |             |     |                                                                             |
| 22 |             |     |                                                                             |

### Methods: Monitoring

|    |                 |     |                                                                               |
|----|-----------------|-----|-------------------------------------------------------------------------------|
| 23 |                 |     |                                                                               |
| 24 |                 |     |                                                                               |
| 25 | Data monitoring | 21a | Composition of data monitoring committee (DMC); summary of its role           |
| 26 |                 |     | and reporting structure; statement of whether it is independent from          |
| 27 |                 |     | the sponsor and competing interests; and reference to where further           |
| 28 |                 |     | details about its charter can be found, if not in the protocol.               |
| 29 |                 |     | Alternatively, an explanation of why a DMC is not needed ( <b>n.a. A data</b> |
| 30 |                 |     | <b>monitoring is not needed as the training (cognitive reappraisal</b>        |
| 31 |                 |     | <b>training) and the control training are expected to carry no risks.</b> )   |
| 32 |                 |     |                                                                               |
| 33 |                 | 21b | Description of any interim analyses and stopping guidelines, including        |
| 34 |                 |     | who will have access to these interim results and make the final              |
| 35 |                 |     | decision to terminate the trial ( <b>n.a., As the training (cognitive</b>     |
| 36 |                 |     | <b>reappraisal training) and the control training are expected to</b>         |
| 37 |                 |     | <b>carry no risks, there are no stopping guidelines and interims</b>          |
| 38 |                 |     | <b>analyses planned.</b> )                                                    |
| 39 |                 |     |                                                                               |
| 40 |                 |     |                                                                               |
| 41 |                 |     |                                                                               |
| 42 |                 |     |                                                                               |
| 43 | Harms           | 22  | Plans for collecting, assessing, reporting, and managing solicited and        |
| 44 |                 |     | spontaneously reported adverse events and other unintended effects            |
| 45 |                 |     | of trial interventions or trial conduct ( <b>p. 8, Section “Procedure”</b> )  |
| 46 |                 |     |                                                                               |
| 47 | Auditing        | 23  | Frequency and procedures for auditing trial conduct, if any, and              |
| 48 |                 |     | whether the process will be independent from investigators and the            |
| 49 |                 |     | sponsor ( <b>n.a.</b> )                                                       |
| 50 |                 |     |                                                                               |
| 51 |                 |     |                                                                               |

### Ethics and dissemination

|    |                 |    |                                                                        |
|----|-----------------|----|------------------------------------------------------------------------|
| 52 |                 |    |                                                                        |
| 53 |                 |    |                                                                        |
| 54 | Research ethics | 24 | Plans for seeking research ethics committee/institutional review board |
| 55 | approval        |    | (REC/IRB) approval ( <b>p. 17, section “Ethics approval”</b> )         |
| 56 |                 |    |                                                                        |
| 57 |                 |    |                                                                        |
| 58 |                 |    |                                                                        |
| 59 |                 |    |                                                                        |
| 60 |                 |    |                                                                        |

|    |                   |     |                                                                                  |
|----|-------------------|-----|----------------------------------------------------------------------------------|
| 1  |                   |     |                                                                                  |
| 2  | Protocol          | 25  | Plans for communicating important protocol modifications (eg,                    |
| 3  | amendments        |     | changes to eligibility criteria, outcomes, analyses) to relevant parties         |
| 4  |                   |     | (eg, investigators, REC/IRBs, trial participants, trial registries, journals,    |
| 5  |                   |     | regulators) ( <b>p. 5, section “Methods and analysis”</b> )                      |
| 6  |                   |     |                                                                                  |
| 7  | Consent or assent | 26a | Who will obtain informed consent or assent from potential trial                  |
| 8  |                   |     | participants or authorised surrogates, and how (see Item 32) ( <b>p. 6,</b>      |
| 9  |                   |     | <b>section “Procedure”</b> )                                                     |
| 10 |                   |     |                                                                                  |
| 11 |                   | 26b | Additional consent provisions for collection and use of participant data         |
| 12 |                   |     | and biological specimens in ancillary studies, if applicable ( <b>pp. 6-7,</b>   |
| 13 |                   |     | <b>section “Procedure”</b> )                                                     |
| 14 |                   |     |                                                                                  |
| 15 |                   |     |                                                                                  |
| 16 | Confidentiality   | 27  | How personal information about potential and enrolled participants will          |
| 17 |                   |     | be collected, shared, and maintained in order to protect confidentiality         |
| 18 |                   |     | before, during, and after the trial ( <b>p. 13, section “Data management</b>     |
| 19 |                   |     | <b>and confidentiality”</b> )                                                    |
| 20 |                   |     |                                                                                  |
| 21 |                   |     |                                                                                  |
| 22 | Declaration of    | 28  | Financial and other competing interests for principal investigators for          |
| 23 | interests         |     | the overall trial and each study site ( <b>p. 18, section “Competing</b>         |
| 24 |                   |     | <b>interests”</b> )                                                              |
| 25 |                   |     |                                                                                  |
| 26 | Access to data    | 29  | Statement of who will have access to the final trial dataset, and                |
| 27 |                   |     | disclosure of contractual agreements that limit such access for                  |
| 28 |                   |     | investigators ( <b>p. 13, section “Data management and</b>                       |
| 29 |                   |     | <b>confidentiality”</b> )                                                        |
| 30 |                   |     |                                                                                  |
| 31 |                   |     |                                                                                  |
| 32 | Ancillary and     | 30  | Provisions, if any, for ancillary and post-trial care, and for                   |
| 33 | post-trial care   |     | compensation to those who suffer harm from trial participation ( <b>n.a.</b> )   |
| 34 |                   |     |                                                                                  |
| 35 | Dissemination     | 31a | Plans for investigators and sponsor to communicate trial results to              |
| 36 | policy            |     | participants, healthcare professionals, the public, and other relevant           |
| 37 |                   |     | groups (eg, via publication, reporting in results databases, or other            |
| 38 |                   |     | data sharing arrangements), including any publication restrictions ( <b>p.</b>   |
| 39 |                   |     | <b>2, section “Ethics and Dissemination”</b> )                                   |
| 40 |                   |     |                                                                                  |
| 41 |                   |     |                                                                                  |
| 42 |                   | 31b | Authorship eligibility guidelines and any intended use of professional           |
| 43 |                   |     | writers ( <b>n.a., no intended use of professional writers; author’s</b>         |
| 44 |                   |     | <b>contribution are summarized on p. 18</b> )                                    |
| 45 |                   |     |                                                                                  |
| 46 |                   |     |                                                                                  |
| 47 |                   | 31c | Plans, if any, for granting public access to the full protocol, participant-     |
| 48 |                   |     | level dataset, and statistical ( <b>p. 18, section “Availability of data and</b> |
| 49 |                   |     | <b>material”</b> )                                                               |
| 50 |                   |     |                                                                                  |
| 51 |                   |     |                                                                                  |
| 52 | <b>Appendices</b> |     |                                                                                  |
| 53 |                   |     |                                                                                  |
| 54 | Informed consent  | 32  | Model consent form and other related documentation given to                      |
| 55 | materials         |     | participants and authorised surrogates ( <b>n.a., documents in German</b> )      |
| 56 |                   |     |                                                                                  |
| 57 | Biological        | 33  | Plans for collection, laboratory evaluation, and storage of biological           |
| 58 | specimens         |     | specimens for genetic or molecular analysis in the current trial and for         |
| 59 |                   |     | future use in ancillary studies, if applicable ( <b>n.a.</b> )                   |
| 60 |                   |     |                                                                                  |

1 \*It is strongly recommended that this checklist be read in conjunction with the SPIRIT 2013  
2 Explanation & Elaboration for important clarification on the items. Amendments to the  
3 protocol should be tracked and dated. The SPIRIT checklist is copyrighted by the SPIRIT  
4 Group under the Creative Commons "[Attribution-NonCommercial-NoDerivs 3.0 Unported](#)"  
5 license.  
6  
7  
8  
9  
10  
11  
12  
13  
14  
15  
16  
17  
18  
19  
20  
21  
22  
23  
24  
25  
26  
27  
28  
29  
30  
31  
32  
33  
34  
35  
36  
37  
38  
39  
40  
41  
42  
43  
44  
45  
46  
47  
48  
49  
50  
51  
52  
53  
54  
55  
56  
57  
58  
59  
60

For peer review only

# BMJ Open

## Study protocol for a randomized-controlled study on emotion regulation training for adolescents with major depression: the KONNI study

|                                 |                                                                                                                                                                                                                                                                                                                                                                                                                                                                                                                                                                                                                                                                                                                                                                                                                                                                                                                                                                  |
|---------------------------------|------------------------------------------------------------------------------------------------------------------------------------------------------------------------------------------------------------------------------------------------------------------------------------------------------------------------------------------------------------------------------------------------------------------------------------------------------------------------------------------------------------------------------------------------------------------------------------------------------------------------------------------------------------------------------------------------------------------------------------------------------------------------------------------------------------------------------------------------------------------------------------------------------------------------------------------------------------------|
| Journal:                        | <i>BMJ Open</i>                                                                                                                                                                                                                                                                                                                                                                                                                                                                                                                                                                                                                                                                                                                                                                                                                                                                                                                                                  |
| Manuscript ID                   | bmjopen-2019-036093.R2                                                                                                                                                                                                                                                                                                                                                                                                                                                                                                                                                                                                                                                                                                                                                                                                                                                                                                                                           |
| Article Type:                   | Protocol                                                                                                                                                                                                                                                                                                                                                                                                                                                                                                                                                                                                                                                                                                                                                                                                                                                                                                                                                         |
| Date Submitted by the Author:   | 17-Jun-2020                                                                                                                                                                                                                                                                                                                                                                                                                                                                                                                                                                                                                                                                                                                                                                                                                                                                                                                                                      |
| Complete List of Authors:       | Greimel, Ellen; University Hospital Munich, Department of Child and Adolescent Psychiatry, Psychosomatics and Psychotherapy<br>Feldmann, Lisa; University Hospital Munich, Department of Child and Adolescent Psychiatry, Psychosomatics and Psychotherapy<br>Piechaczek, Charlotte; University Hospital Munich, Department of Child and Adolescent Psychiatry, Psychosomatics and Psychotherapy<br>Oort, Frans; University of Amsterdam, Research Institute of Child Development and Education<br>Bartling, Juergen; University Hospital Munich, Department of Child and Adolescent Psychiatry and Psychotherapy<br>Schulte-Rüther, Martin; RWTH Aachen University, Translational Brain Medicine in Psychiatry and Neurology, Department of Child and Adolescent Psychiatry, Psychosomatics, and Psychotherapy; JARA-Brain<br>Schulte-Körne, Gerd ; University Hospital Munich, Department of Child and Adolescent Psychiatry, Psychosomatics and Psychotherapy |
| <b>Primary Subject Heading</b>: | Mental health                                                                                                                                                                                                                                                                                                                                                                                                                                                                                                                                                                                                                                                                                                                                                                                                                                                                                                                                                    |
| Secondary Subject Heading:      | Pharmacology and therapeutics                                                                                                                                                                                                                                                                                                                                                                                                                                                                                                                                                                                                                                                                                                                                                                                                                                                                                                                                    |
| Keywords:                       | Child & adolescent psychiatry < PSYCHIATRY, Depression & mood disorders < PSYCHIATRY, Clinical trials < THERAPEUTICS, NEUROPHYSIOLOGY                                                                                                                                                                                                                                                                                                                                                                                                                                                                                                                                                                                                                                                                                                                                                                                                                            |
|                                 |                                                                                                                                                                                                                                                                                                                                                                                                                                                                                                                                                                                                                                                                                                                                                                                                                                                                                                                                                                  |

SCHOLARONE™  
Manuscripts



I, the Submitting Author has the right to grant and does grant on behalf of all authors of the Work (as defined in the below author licence), an exclusive licence and/or a non-exclusive licence for contributions from authors who are: i) UK Crown employees; ii) where BMJ has agreed a CC-BY licence shall apply, and/or iii) in accordance with the terms applicable for US Federal Government officers or employees acting as part of their official duties; on a worldwide, perpetual, irrevocable, royalty-free basis to BMJ Publishing Group Ltd ("BMJ") its licensees and where the relevant Journal is co-owned by BMJ to the co-owners of the Journal, to publish the Work in this journal and any other BMJ products and to exploit all rights, as set out in our [licence](#).

The Submitting Author accepts and understands that any supply made under these terms is made by BMJ to the Submitting Author unless you are acting as an employee on behalf of your employer or a postgraduate student of an affiliated institution which is paying any applicable article publishing charge ("APC") for Open Access articles. Where the Submitting Author wishes to make the Work available on an Open Access basis (and intends to pay the relevant APC), the terms of reuse of such Open Access shall be governed by a Creative Commons licence – details of these licences and which [Creative Commons](#) licence will apply to this Work are set out in our licence referred to above.

Other than as permitted in any relevant BMJ Author's Self Archiving Policies, I confirm this Work has not been accepted for publication elsewhere, is not being considered for publication elsewhere and does not duplicate material already published. I confirm all authors consent to publication of this Work and authorise the granting of this licence.



# Study protocol for a randomized-controlled study on emotion regulation training for adolescents with major depression: the KONNI study

Ellen Greimel<sup>a\*</sup>, Lisa Feldmann<sup>a\*</sup>, Charlotte Piechaczek<sup>a</sup>, Frans Oort<sup>b</sup>, Juergen Bartling<sup>a</sup>, Martin Schulte-Rüther<sup>c,d,e</sup> & Gerd Schulte-Körne<sup>a</sup>

<sup>a</sup>Department of Child and Adolescent Psychiatry, Psychosomatics and Psychotherapy, University Hospital, LMU Munich, Munich, Germany

<sup>b</sup>Research Institute of Child Development and Education, University of Amsterdam, Amsterdam, The Netherlands

<sup>c</sup>Translational Brain Medicine in Psychiatry and Neurology, Department of Child and Adolescent Psychiatry, Psychosomatics, and Psychotherapy, RWTH Aachen University

<sup>d</sup>JARA-Brain, Aachen, Germany

<sup>e</sup>Department of Child and Adolescent Psychiatry and Psychotherapy, University Medical Center Göttingen, Göttingen, Germany

\*shared first-authorship

## Address for reprints or correspondence:

Ellen Greimel, Department of Child and Adolescent Psychiatry and Psychotherapy, University Hospital Munich, Munich, Germany

E-mail: [Ellen.Greimel@med.uni-muenchen.de](mailto:Ellen.Greimel@med.uni-muenchen.de), Phone: +49 89 4400 56952, Fax: +49 89 4400 55902

**Word count after revisions: 4.745 (4.315 excluding the Discussion)**

## Abstract

**Introduction:** Major depression (MD) often has its onset during adolescence and is associated with significant morbidity and mortality. One important factor for the development and maintenance of adolescent MD are disturbances in emotion regulation and the underlying neural processes. Cognitive reappraisal (CR) is a particular adaptive emotion regulation strategy. Previously, it has been shown in healthy adults that a task-based training in CR is efficient to reduce negative affect, and that these effects translate into everyday life.

This randomized-controlled trial examines for the first time whether a task-based training in CR proves effective in MD adolescents. Specifically, we will investigate whether the CR training improves the ability to down-regulate negative affect in MD individuals as assessed by behavioral and neurobiological indices, and whether training effects generalize outside the laboratory.

**Methods and analysis:** Adolescents with MD will be randomly allocated to a group that either receives a task-based training in CR or control training. Both involve four training sessions over a time period of two weeks. In the CR training, participants will be instructed to down-regulate negative affective responses to negative pictures via CR, while the control training involves picture viewing. During the training sessions, the Late Positive Potential, gaze fixations on negative picture aspects and affective responses to pictures will be collected. Before and after the training programs, and at a two-week follow-up, overall negative and positive affect, rumination and perceived stress will be assessed as primary outcomes. ANOVAs will be conducted to test the effectiveness of the CR training with regard to both primary outcomes and task-based behavioral and neurobiological parameters.

**Ethics and dissemination:** The study was approved by the Ethics Committee of the Medical Faculty of the LMU Munich, Germany. The results will be published in peer-reviewed journals and disseminated through conferences, social media and public events.

**Trial Registration:** Clinical Trials NCT03957850, registered Mai 21st 2019; URL: <https://clinicaltrials.gov/ct2/show/NCT03957850>.

### Strengths and limitations of the study:

- This study is the first to examine the effectiveness of a targeted CR training in youths with major depression.
- A randomized-controlled design is employed including an active control group.
- In addition to behavioral and questionnaire data, objective neurobiological indices will be collected to assess the effectiveness of the CR training.
- If proven effective, the CR training can be a promising and cost-effective approach to complement and enhance the efficacy of established treatments for adolescent MD.
- As the follow-up is limited to two weeks, the long-term effectiveness needs to be explored in future studies.

## Introduction

Major depression (MD) is among the most debilitating, costly and common psychiatric disorders worldwide.[1] The risk of suffering from a depressive episode sharply rises during adolescence, with point prevalence rates of up to 7%.[2] Adolescents with MD show deficient emotion regulation (ER),[3] i.e., they have difficulties to modulate emotional responses by initiating appropriate regulatory processes.[4] Disturbances in ER and the underlying neural processes have been suggested to be an important risk factor for the development and maintenance of MD.[3, 5] Thus, the development of training regimens that target deficient ER in MD is an important research avenue.

Cognitive-behavioral therapy (CBT) belongs to the gold standard treatments in juvenile MD. However, less than 50% of MD adolescents respond to CBT and only about one third enter remission after treatment.[6, 7] Given the debilitating consequences of adolescent MD,[8] there is an urgent need to enhance the efficacy of established intervention. Recent findings in adults with MD suggest that an additional training of ER might be a promising approach to improve treatment effects.[9, 10] To date, it remains unclear whether these findings can be transferred to juvenile MD. In this regard, the present study takes a first step and systematically investigates the effects of a focused ER training in adolescent MD.

## Cognitive reappraisal in depressed individuals

Cognitive reappraisal (CR) is a frequently studied ER strategy and involves the reinterpretation of a situation such that the emotional response is changed. The habitual use of CR has been shown to relate to good interpersonal functioning and well-being.[11] Questionnaire studies have found that depressive symptoms are associated with less habitual use of CR and more use of maladaptive emotion regulation strategies such as rumination.[12-14] It has been proposed that this habitual pattern in depressed individuals might originate from deficits in the inhibition of negative material which is thought to enhance ruminative thoughts but hampering the effective reappraisal of negative information.[15] To experimentally investigate CR in MD, studies applied a well-established CR paradigm during which participants are instructed to reappraise negative pictures. This regulation condition is compared to an unregulated condition, during which participants are asked to simply attend to negative stimuli. Within

1  
2  
3 the framework of this paradigm, a number of studies in MD collected behavioral measures of self-  
4 reported affect to assess regulation success. Contrary to expectation, some studies found no group  
5 differences between depressive and healthy participants in this index of CR.[16, 17] However, these  
6 results might be biased due to social desirability which probably obscures group differences. Moreover,  
7 complex ER disturbances are unlikely to be captured using simple affect ratings,[18, 19] highlighting  
8 the importance of additionally assessing objective and more sensitive parameters when studying CR,  
9 including neurobiological indices.

10  
11 A commonly studied neurobiological index of CR is the Late Positive Potential (LPP). Studies in healthy  
12 samples show that the LPP is reduced when individuals are instructed to reappraise unpleasant stimuli  
13 compared to attending to unpleasant pictures.[20-22] This decrease is thought to reflect a reduction of  
14 the emotional response following CR, which may result from a shift in stimulus meaning.[23, 24]  
15 Depressive psychopathology has been shown to be associated with a smaller reduction of the LPP during  
16 CR.[23, 25, 26] However, to date, no study has investigated whether this neurobiological disturbance  
17 can be normalized by a repeated training of CR.

18  
19 Besides the LPP, a number of studies in healthy individuals have investigated gaze fixation patterns to  
20 gain insight into the mechanisms underlying CR.[27-29] They found that a greater regulation success is  
21 paralleled by less gaze fixations directed towards negative picture cues. This suggests that the regulatory  
22 effects of CR may partly be attributed to gaze deployment, highlighting the importance of also assessing  
23 gaze fixation when examining CR.

### 24 25 26 **Trainability of cognitive reappraisal**

27  
28 Evidence from a randomized controlled trial (RCT) in adult MD suggests that systematically training  
29 ER skills in addition to standard CBT improves treatment efficacy.[9, 10] As the ER training of this  
30 RCT aimed at enhancing general ER skills and included CR among other ER strategies, the unique  
31 contribution of CR remains to be investigated. A recent investigation addressed this issue experimentally  
32 in healthy adults,[30] demonstrating that a task-based CR training resulted in less perceived stress in  
33 daily life. Beneficial effects of a task-based CR training have recently also been shown in healthy and  
34 anxious adolescents.[31] While these results are encouraging, it needs to be examined whether the

1  
2  
3 findings can be extended to MD samples and whether a CR training results in reductions in depressive  
4 symptomatology, including ruminative thoughts. In this context, it has been proposed that CR training  
5 improves cognitive control abilities, including the ability to inhibit negative material. As impairments  
6 in the ability to inhibit negative information are thought to play a causal role in rumination, training the  
7 ability to reappraise negative information should thus reduce ruminative thoughts.[15]  
8  
9  
10  
11  
12  
13  
14

### 15 **Aim of the study**

16  
17 The aim of the study is to assess whether in MD adolescents, a task-based CR training results in an  
18 improved downregulation of negative affective responses as assessed by behavioral and neurobiological  
19 indices. Moreover, the study aims to investigate whether the training effects generalize outside the  
20 laboratory, i.e., lead to affect-related changes and a reduction in perceived stress and rumination.  
21  
22  
23  
24  
25

26 It is hypothesized that over the course of the CR training, MD adolescents show improvements in the  
27 downregulation of negative affective responses as assessed by task-based behavioral[30] and  
28 neurobiological indices. Based on prior research,[30, 31] it is further hypothesized that the CR training  
29 results in improvements in affect- and stress-related symptoms in daily life.  
30  
31  
32  
33  
34  
35  
36

### 37 **Methods and analysis**

38  
39 The study (Public and scientific Title: Cognitive Reappraisal in Adolescents with Major Depression:  
40 From Neurobiological Mechanisms to Intervention; German acronym: KONNI) was prospectively  
41 registered on ClinicalTrials.gov (NCT03957850) before recruitment start. The study protocol and the  
42 template informed consent/assent forms (including two amendments) were approved by the institutional  
43 review board of the local ethics committee (Ethics Committee of the Medical Faculty of the LMU  
44 Munich, Germany; study ID: 63-16) on 30<sup>th</sup> January 2019 and are reported in line with the Standard  
45 Protocol Items: Recommendations for Interventional Trials Statement (SPIRIT 2013). Important  
46 modifications to the study protocol would require an additional amendment, which would have to be  
47 approved by the Ethics Committee before implementation. The trial registry (ClinicalTrials.gov) would  
48 then be updated.  
49  
50  
51  
52  
53  
54  
55  
56  
57  
58  
59  
60

## Design

This interventional study is designed as a short-term randomized controlled, participant-blind clinical superiority trial including two parallel groups of MD adolescents. Participants will be randomly assigned to a group that receives task-based training in CR or to a control training. All participants will take part in one diagnostic assessment (T0), four training sessions (T1-4) over the course of two weeks, and a follow-up two weeks after T4. All questionnaires and test procedures are summarized in Table 1. During the training sessions, task-based indices of CR will be continuously assessed based on behavioral affect ratings and the LPP. Moreover, eye gaze will be recorded during the task-based training. The KONNI study design is depicted in Figure 1.

## Participants

Participants aged 12-18 years with a current ICD-10 diagnosis of MD,[32] an IQ of  $\geq 80$  and sufficient German language skills will be included. The following exclusion criteria will be applied: acute suicidality, neurological disorders, schizophrenic disorder, pervasive developmental disorder, bipolar disorder, borderline personality disorder, substance dependence disorder and gender dysphoria. Participants with other psychiatric comorbidities are included if MD is the primary diagnosis.

## Recruitment

MD adolescents will be primarily recruited from the Department of Child and Adolescent Psychiatry, Psychosomatics and Psychotherapy, University Hospital of the LMU Munich, Germany. Currently untreated MD patients from the waiting list, and in-and outpatients are enrolled in the study. The first participant was enrolled in May 27<sup>th</sup>, 2019. The planned completion of participant enrollment is in April 2021. Since the start of the study n=15 subjects were enrolled.

## Procedure

Adolescents and one parent/legal custodian (for participants <18 years) will be contacted by an experienced study nurse certified in Good Clinical Practice (GCP) and will be informed about the study details, including the fact that the allocation to the training groups will be made based on a predefined

1  
2  
3 randomization list. All potential study participants and their parents/legal custodians will be approached  
4  
5 by the study nurse unless it is known beforehand that the exclusion criteria are met (e.g., acute  
6  
7 suicidality, gender dysphoria). If the clinicians of potential participants conclude that the capacity to  
8  
9 provide informed consent/assent are not met (e.g., in case of insufficient German skills, cognitive  
10  
11 disability or an acute crisis), participants and their parents/legal custodians will not be approached. In  
12  
13 case of interest in participation, their written informed consent/assent will be collected. In the written  
14  
15 informed consent/assent, participants and their parent/legal custodian are asked for their permission that  
16  
17 the data can also be used for an ancillary case-control study on neurobiological underpinnings of ER in  
18  
19 MD. The participants and the parent/legal custodian will be blinded regarding allocation to the  
20  
21 CR/control training group until study completion and only unblinded prior to study completion if they  
22  
23 terminate participation prematurely. At the first session (T0), a diagnostic interview and other baseline  
24  
25 measures (see below) will be applied to the adolescent and will last ~2,5 hours. The diagnostic session  
26  
27 will be conducted by psychologically trained staff.

28  
29  
30 If the participant is eligible for the study, the following session appointments will be scheduled and the  
31  
32 participant will be randomly allocated to the CR or the control training group. To ensure allocation  
33  
34 concealment, the random allocation to one of the groups is implemented after completion of baseline  
35  
36 measurements; i.e., neither the recruiter nor the person conducting the baseline session know to which  
37  
38 group the participant will be assigned after T0. Access to the allocation list is limited to the principal  
39  
40 investigator (E.G.) and her deputy (L.F.), who will inform the experimenters about the allocation of the  
41  
42 participant shortly before the first training session (after the diagnostic session and the decision to  
43  
44 include the participant in the study). Randomization stratifying for age (<15 years vs. ≥15 years of age)<sup>1</sup>  
45  
46 and sex will be performed by a statistician, who is neither involved in recruitment nor in testing of  
47  
48 participants. The randomization will be performed with a 1:1 allocation. A follow-up session will take  
49  
50 place two weeks after completion of the forth training session. After the follow-up, participants are  
51  
52 unblinded regarding group allocation by one of the experimenters. As expense allowance for study  
53  
54 participation (~10 hours including follow-up), the participants will receive 100€. Participation is  
55  
56  
57  
58  
59

---

<sup>1</sup> Based on prior studies in MD adolescents conducted in our department, 15 is the expected approximate median age of MD participants.



1  
2  
3 voluntary and can be discontinued at any time for any reason. Participation is discontinued in case of  
4  
5 acute suicidality during the study. No other criteria for discontinuation are defined. To assess the  
6  
7 feasibility of conducting a large-scale multi-center RCT on the effects of a CR training in addition to  
8  
9 standard treatment, the following data will be collected and reported: participation and non-participation  
10  
11 rate, drop-outs and reasons for drop-outs, training attendance rates and spontaneously reported adverse  
12  
13 effects. Treatment fidelity concerning the training is assured by standardized oral and written instructions  
14  
15 and by comprehensive training of the experimenters. The experimenters will be either clinical  
16  
17 psychologists or advanced and in-depth trained psychology students. The concomitant treatment as usual  
18  
19 is permitted during the ongoing study and information on the type of treatment during the study will be  
20  
21 assessed. Moreover, patient safety data will be assessed by recording any spontaneously reported  
22  
23 adverse effects.  
24  
25  
26  
27

### 28 **Cognitive Reappraisal Training**

29  
30 The CR training task is well-established and is adapted from previous studies,[22, 33-35] including a  
31  
32 study from our group, in which we demonstrated that adolescents with MD understand and comply with  
33  
34 task instructions, and are able to down-regulate negative affective responses to negative pictures via  
35  
36 CR.[36] The training procedure was adapted from [30]. An exemplary illustration of an experimental  
37  
38 trial is depicted in Figure 2. Participants will be presented emotional pictures which are preceded by a  
39  
40 condition specific cue signaling the appropriate strategy (attend vs. reappraise) during picture  
41  
42 presentation. Following each picture, participants are instructed to indicate their affective response to  
43  
44 the image on the portrait version of the nine-point self-assessment manikin scale for valance [SAM; 37,  
45  
46 for the portrait version see 38, 39], which has been frequently applied in youth samples.[40, 41] A higher  
47  
48 score on this scale indicates a more positive valance rating. The task involves four conditions: 1)  
49  
50 **Negative-reappraise:** participants are asked to view negative pictures and to decrease their affective  
51  
52 response by reappraising the negative event. Participants are explicitly instructed to use the  
53  
54 reinterpretation tactic during CR, which involves “mentally changing the meaning of the actions, context  
55  
56 and/or outcome depicted in a stimulus”. [30] 2) **Negative-attend**, 3) **Neutral-attend** and 4) **Positive-**  
57  
58 **attend:** participants are asked to view the pictures and to respond naturally to them without trying to  
59  
60



1  
2  
3 alter their affective response. Comparison of the negative-reappraise and the negative-attend conditions  
4 allows assessing behavioral and neural indices of reappraisal success. The neutral-attend and the  
5 positive-attend conditions are included to avoid slight changes in negative affect due to the exclusive  
6 presentation of unpleasant pictures.[42]  
7  
8  
9

10  
11 The training task will be repeated over four training sessions. Before the first session, participants will  
12 complete a comprehensive practice training, during which a trained experimenter will provide  
13 standardized oral instructions regarding the task and the two strategies (attend, reappraise).[30, 36]  
14  
15 Thereafter, walk-through images are presented to confirm the appropriate use of the strategies. Task  
16 instructions will be briefly summarized before each training session.  
17  
18  
19

20  
21 In each training session, 144 pictures will be presented in 3 blocks, each containing 12 positive-attend,  
22 12 neutral-attend, 12 negative-attend, and 12 negative-reappraise trials. Developmentally appropriate  
23 pictures (e.g., excluding pictures of dead persons or pornographic images) are taken from the  
24 International Affective Picture System,[IAPS; 43] Besançon Affective Picture Set-Adolescents,[BAPS-  
25 Ado; 44] and Besançon Affective Picture Set-Adults,[BAPS-Adult; 45] with the latter two sets being  
26 derived from the Besançon Attachment Pictures Set. Each picture will be presented twice over the course  
27 of the training.[30] To ensure adherence to task instructions, participants will fill in a questionnaire after  
28 each training session to indicate which strategies they used during the task.  
29  
30  
31  
32  
33  
34  
35  
36  
37  
38  
39  
40

### 41 **Control training**

42  
43 The control training is implemented to account for unspecific effects and the task employed is similar  
44 to the CR task except that it involves no “negative-reappraise” condition. Instead, the control task only  
45 involves attend conditions (negative-attend, neutral-attend, positive-attend). To keep the total number  
46 of trials involving negative pictures constant across the two groups, the control task involves twice as  
47 many negative-attend trials as the CR training group. Mirroring the CR training procedure, the control  
48 training is repeated over four sessions and preceded by standardized oral instructions and a practice  
49 session. Participants of the control training group will also fill in a questionnaire on how they resolved  
50 the task after each training session.  
51  
52  
53  
54  
55  
56  
57  
58  
59  
60

## Measures

Information about psychometric properties of all measures described in the following paragraph are summarized in Table 1 along with the respective assessments points.

### Diagnostic measures

A diagnosis of MD and potential comorbidities will be assessed using a well-established German standardized semi-structured diagnostic interview (Kinder-DIPS).[46, 47] The interview will be administered by experienced, psychologically trained experimenters. To assess inter-rater reliability based on Cohen's kappa ( $k$ ), 10% of the Kinder-DIPS interviews will be rated by two experimenters. IQ will be estimated based on the first part of the CFT-20-R.[48] For some patients, results from other established IQ tests [e.g. WISC-V; 49] will be available from routine care, which will be used instead.

### Outcome measures

#### Primary outcomes

The primary outcomes of the study are (1) change in rumination from baseline (T0) to post-training (directly after T4) and follow-up [assessed by the scales "self-focused rumination" and "symptom-focused rumination" of the German short version of the Response Styles Questionnaire; RSQ-D; 50]; (2) change in depressive symptoms [assessed by the German version of the Beck Depression Inventory – Second Edition; BDI-II; 51] from baseline (T0) to post-training (directly after T4); (3) change in perceived stress over the course of the four training sessions and at follow-up [assessed by the German translation of the Perceived Stress Scale 10; PSS-10; by Prof. Dr. Arndt Büssing; 52]<sup>2</sup>; (4) changes in negative and positive affect [assessed by the Negative Affect Scale and Positive Affect Scale for Children Shortened Version; PANAS-C-SF; 53] over the course of the four training sessions and at follow-up.

#### Secondary outcomes

---

<sup>2</sup>In the PSS-10, items were reworded to "in the past few days" instead of "in general" to better allow assessing changes of the course of the training.

1  
2  
3 One secondary outcome is the change in the downregulation of affective behavioral responses to  
4 negative pictures by means of CR. Affective behavioral responses to negative pictures will be  
5 continuously assessed during each of the four training sessions using the SAM rating scale.[37, with the  
6 portrait version from 38, 39]  
7  
8  
9

10  
11 Another secondary outcome is the change in the downregulation of the early and late LPP amplitude to  
12 negative pictures by means of CR. The LPP elicited to pictures in the negative-attend and the negative-  
13 reappraise condition will be continuously assessed during each of the four training sessions.  
14  
15 Additionally, changes in the percent duration of gaze fixations within a-priori defined emotional interest  
16 areas of negative pictures<sup>3</sup> will be assessed during both the negative-attend and negative-reappraise  
17 condition over the course of the four training sessions.  
18  
19  
20  
21  
22  
23

24 All secondary outcome measures will only be assessed in the CR training group, as participants in the  
25 control training group are not instructed to apply CR. However, these measures will also be assessed in  
26 the control training group during the negative-attend condition to allow additional exploratory analyses.  
27  
28  
29  
30  
31

### 32 **Confounding variable**

33 Participants will complete the Social Desirability Scale.[SES-17; 54] The rationale for assessing this  
34 confounding variable is that behavioral ratings of affective responses to pictures will be assessed, which  
35 are prone to response biases.[18]  
36  
37  
38  
39  
40  
41  
42

### 43 **Mediators**

44 State rumination during the training will be treated as a potential mediator as ruminative thoughts might  
45 hamper beneficial training effects.[55] After completion of each training session, participants in the CR  
46 and control training group rate state rumination during the task on a scale from 0 “not at all” to 10  
47 “exactly” based on a 5-item questionnaire applied in a previous study.[56]  
48  
49  
50  
51  
52

53 We will also assess a potential mediating role of executive function abilities, which are thought to be  
54 critically involved in ER.[57] Individual baseline differences in executive function abilities might thus  
55  
56  
57  
58  
59  
60

---

<sup>3</sup>Emotional areas of interest of negative pictures will be defined based on a separate validation study.

1  
2  
3 prove important mediators of training outcome. Therefore, set-shifting, working memory and inhibition  
4 [58, 59] as the three core components of executive functions will be assessed based on the TAP  
5 2.3.[Testbatterie zur Aufmerksamkeitsprüfung; 60]  
6  
7

8  
9 Moreover, we will treat habitual ER as a potential mediator, which will be assessed based on the FEEL-  
10 KJ [61]. The FEEL-KJ is a self-report questionnaire assessing habitual adaptive and maladaptive ER  
11 strategies.  
12  
13  
14

### 15 16 17 18 **Moderators**

19  
20 As anxiety disorders/symptoms frequently co-occur with MD,[62] state and trait anxiety will be assessed  
21 based on the State-Trait-Anxiety Inventory (STAI).[63] Moreover, symptoms of psychopathology will  
22 be screened using the Child Behavior Checklist (CBCL 6-18R).[64] Both variables will be treated as  
23 potential moderators.  
24  
25  
26  
27  
28  
29

### 30 31 **Eye-tracking apparatus**

32  
33 During the four training sessions, eye-movements will be continuously recorded using the Eyelink 1000  
34 Plus SR Research eye-tracker. At the beginning of the training, participants are seated at the viewing  
35 distance of approx. 55 cm from the monitor and a 9-point calibration is performed. Prior to each  
36 experimental trial, a drift correction is conducted.  
37  
38  
39  
40  
41  
42

### 43 44 **Electroencephalogram recording and preprocessing**

45  
46 The electroencephalogram data is recorded using the Electrical Geodesic Inc. 128-channel system with  
47 500 Hz sampling rate and Cz as reference electrode. Impedance is kept below 50 k $\Omega$  during recording.  
48 The further preprocessing and analyses steps will be performed with Brainvision Analyzer 2.1 (Brain  
49 Products GmbH, Germany). After filtering, removal of electro-oculographic artefacts based on  
50 Independent Component Analysis and exclusion of other artefacts, the signal will be re-referenced. Data  
51 will be segmented into epochs, baseline-corrected and averaged separately for each participant and  
52 condition. The LPP will be measured as the mean amplitude at a centro-parietal region-of-interest within  
53 early (<300ms) and late time windows ( $\geq$ 300 ms) following picture onset.[33, 65]  
54  
55  
56  
57  
58  
59  
60

### **Data management and confidentiality**

All data will be entered electronically in IBM SPSS statistics by a scientific assistant. Plausibility and completeness checks will be regularly performed by E.G., L.F., C.P. to promote and monitor data quality. Original documents will be maintained for 15 years in the department. All original and electronic data is stored on the hospitals server under a pseudorandomized coded ID, which does not contain names or birth dates of the participants. Only the project leader and her deputies have access to the participants' names and the corresponding allocation to the encryption code and the original documents, which are kept in locked cabinets. The records containing names and other personal identifiers (e.g., informed consent/assent forms) will be stored in locked cabinets separately from the study records which are identified by the coded ID. The participants' study information will not be released outside the study, except in case of threat to self or threat to others. The final cleaned data sets will be provided to all investigators of the study. To adhere to principles of open science and to facilitate further use of aggregated data in meta-analytic approaches, we will consider making raw data available to other researchers if this can be achieved along with protecting sensitive patient information, such as sociodemographic information. Since patients could possibly be identified by making our raw data publicly available, ethical principles of protecting patient confidentiality would be breached. Aggregated group data can be made available upon request.

### **Calculation of sample size**

A rough approximation of the requested sample size targeted at rumination as one of the primary outcomes can be achieved by referring to a previous study.[66] This study investigated the effects of a task-based cognitive control training compared to treatment as usual in adult MD. The training aimed at improving ER skills indirectly by targeting mechanisms thought to underlie ER. This study reported a large effect size in the training group from pre to post (Cohen's  $d=1.42$ ) on a measure related to negative affect (rumination). Based on a conservative assumption, a large effect size of  $d=0.85$  is expected with regard to changes in rumination for the CR training from pre to post. For the control training, a small effect size ( $d=0.2$ ) is expected from pre to post due to unspecific "positive" effects of the control

1  
2  
3 intervention. This effect size is based on prior evidence<sup>4</sup> on the effects of a similar control training in  
4  
5 young adults.[30]

6  
7 Based on these assumptions, calculation of the required sample size to detect a significant 2(group) x  
8  
9 2(time: T0=pre, T4=post) interaction for rumination using a repeated measures ANOVA with a 5% level  
10  
11 of significance ( $\alpha=0.05$ ) and 80% statistical power ( $1-\beta=0.80$ ) revealed an  $N=47$  for the total  
12  
13 group (assuming a 0.7 pre-post correlation). The drop-out rate for the study is estimated at approx. 33%.  
14  
15 Thus,  $n=35$  adolescents will be enrolled in each group. The necessary sample size was calculated with  
16  
17 G\*power 3.1. Statistical power of analyses that involve more measurements, such as the analysis of  
18  
19 affect, will have more than 80% statistical power if effect sizes are similar.  
20  
21  
22  
23

### 24 **Statistical analysis**

25  
26 To test the hypotheses that the CR training results in a stronger decrease in depressive  
27  
28 symptoms/rumination from baseline to post-training assessment compared to a control training, a mixed-  
29  
30 model ANOVA with the factors group (CR vs. control training) and time (T0, T4) will be conducted for  
31  
32 the BDI-II and the two RSQ-D scales “self-focused rumination”, “symptom-focused rumination”. To  
33  
34 account for the fact that the RSQ-D will be reassessed at follow-up, a mixed-model ANOVA with the  
35  
36 factors group (CR vs. control training) and time (T0, T4, follow-up) will additionally be conducted for  
37  
38 the two rumination scales. Mixed modeling (also known as multilevel analysis, with observations  
39  
40 “nested” within participants) has the advantage over regular repeated measures ANOVA that all  
41  
42 available data can be used, including data from incomplete cases, without using imputation techniques  
43  
44 for missing data.[67] To test the hypotheses that the CR training results in a a) stronger decrease in  
45  
46 negative and b) stronger increase in positive affect from pre- to post-training and follow-up assessment  
47  
48 compared to the control training, mixed-model ANOVAs with the factors group (CR vs. control training)  
49  
50 and time (T1, T2, T3, T4, follow-up) will be conducted for the Negative Affect/ Positive Affect scale of  
51  
52 the PANAS-C-SF. The same statistical model procedure will be applied for perceived stress (PSS-10).  
53  
54  
55  
56  
57  
58  
59

---

60 <sup>4</sup> Detailed statistical information was derived from personal communication with corresponding author of this  
study; B. Denny, April 26th, 2017.

1  
2  
3 To test the hypothesis that over the course of the CR training, MD adolescents show an increased  
4 downregulation of the early and late LPP amplitude via CR, a mixed-model ANOVA with the factors  
5 2(condition: negative-reappraise, negative-attend) x 4(training session: T1, T2, T3, T4) will be  
6 conducted separately for early and late LPP time windows. The same statistical procedure will be  
7 conducted for the affective ratings of negative pictures and the percent of gaze fixation duration in  
8 emotional areas of negative pictures. Correlation analyses will be performed between the percent of gaze  
9 fixation duration in emotional areas of negative pictures and ER success (downregulation of the LPP  
10 and affective ratings of negative pictures via CR).  
11  
12

13  
14 To examine changes of the LPP, affective ratings of negative pictures and gaze fixations for the negative-  
15 attend condition in the control training group over the course of the training, additional exploratory  
16 ANOVAs will be conducted. Likewise, for the control training group, exploratory correlation analyses  
17 will be calculated to examine relationships between these measures and gaze fixation duration in  
18 emotional areas of negative pictures. Finally, moderation and mediation analyses will be applied to  
19 examine the role of mediating and moderating variables.  
20  
21  
22  
23  
24  
25  
26  
27  
28  
29  
30  
31  
32  
33  
34

### 35 **Patient and public involvement**

36 Participants or their parents were not involved in designing the study. However, we will present the  
37 results of the study to parent and participant representatives to include their suggestions in the  
38 dissemination plan. Moreover, parallel to publication of the results, all participants and their families  
39 will receive a letter summarizing the main findings and conclusions in comprehensible language.  
40  
41  
42  
43  
44  
45  
46

### 47 **Discussion**

48 This study will for the first time elucidate whether in adolescents with MD, a CR training shows  
49 beneficial effects both in and outside the laboratory. If the training proves effective, this approach might  
50 be a promising resource-effective intervention for adolescents with MD. Such an intervention could,  
51 e.g., be applied to bridge the often long waiting times for treatment of MD or as an adjunction to a  
52 treatment as usual. Moreover, after psychoeducation on CR and guided practice of this strategy in  
53 psychotherapy, the training could also be (online) applied as an adjunct to treatment as usual. In such a  
54  
55  
56  
57  
58  
59  
60

1  
2  
3 context, the psychotherapist could monitor difficulties and progress in the use of CR, and promote the  
4 transfer of strategy into everyday life of the patient.  
5

6  
7 Building on the results from the present RCT, future investigations could additionally consider transfer  
8 effects to CR tasks other than the training tasks or to CR abilities in daily life e.g., based on ecological  
9 momentary assessment. Moreover, as a next step, it would be worthwhile to assess whether this training  
10 might prove effective in patients with other psychiatric disorders which are also characterized by  
11 deficient ER abilities, such as anxiety disorders and eating disorders.[68]  
12  
13

14  
15 A limiting factor of the study is the short follow-up interval of two weeks. Thus, future studies should  
16 include a longer follow-up interval to also examine whether the effects of the training are long-lasting.  
17  
18 Another limitation is that the study is single-blinded (participant-blinded) concerning the allocation to  
19 the CR training vs. control training. This single-blinding procedure entails the risk that the experimenters  
20 will transfer their expectations to the participants. However, as the participants will perform a  
21 comprehensive practice training that is guided by the experimenter, double-blinding would not be  
22 feasible. Finally, it should be stated the present study does not include the ecological momentary  
23 assessment of outcome measures. Expanding upon the present study, it would be important to also apply  
24 experience sampling methods in future work to be able to draw comprehensive conclusions regarding  
25 transfer effects of the CR training to daily live. Despite these caveats, the results of our study will be an  
26 important step towards larger scale, multi-center RCTs in MD adolescents to investigate whether a CR  
27 training increases the efficacy of standard treatments. Furthermore, the study will elucidate  
28 neurobiological changes that occur during training and whether these are linked to changes in training  
29 outcome. To this end, our protocol may also aid to identify potential biomarkers for monitoring and  
30 predicting treatment success and thereby spark further research into the direction of individualized  
31 treatment adaptation based on neurobiological parameters.  
32  
33  
34  
35  
36  
37  
38  
39  
40  
41  
42  
43  
44  
45  
46  
47  
48  
49  
50  
51  
52  
53  
54  
55  
56  
57  
58  
59  
60



## Ethics and Dissemination

Written informed consent/assent will be taken by the participating adolescents and their parents/legal custodians. The study protocol and the template informed consent/assent forms were approved (including two amendments) by the institutional review board of the local ethics committee (Ethics Committee of the Medical Faculty of the LMU Munich, Germany; study ID: 63-16) on 30<sup>th</sup> January 2019.

Study results will be presented at national and international conferences and published in peer-reviewed publications. Moreover, the participants and their parents will receive a summary of the study results in layman's language.

## Abbreviations

BAPS-Ado: Besançon Affective Picture Set-Adolescents; BAPS-Adult: Besançon Affective Picture Set-Adults; BDI-II: Beck depression inventory; CBCL 6-18R: Child Behavior Checklist for the ages 6-18; CFT-20-R (revidierte Grundintelligenztest Skala 2): Culture fair intelligence test; CBT: Cognitive-behavioral therapy; CR: Cognitive reappraisal; DFG (Deutsche Forschungsgemeinschaft): German Research Foundation; FEEL-KJ (Fragebogen zur Erhebung der Emotionsregulation bei Kindern und Jugendlichen): Questionnaire for the assessment of emotion regulation in children and adolescents; IAPS: International Affective Picture System; ICD-10: International Statistical Classification of Diseases and Related Health Problems 10<sup>th</sup> Revision; IQ: Intelligence Quotient; Kinder-DIPS (Diagnostisches Interview bei psychischen Störungen im Kindes- und Jugendalter): Diagnostic interview for psychiatric disorders for children and adolescents; LMU: Ludwig-Maximilians University; LPP: Late Positive Potential; MD: Major depression; PANAS-C-SF: Negative Affect Scale and Positive Affect Scale for Children Shortened Version for Children Shortened Version; PSS-10: Perceived Stress Scale 10; RSQ-D: German Version of the Response Styles Questionnaire; SAM: self-assessment manikin rating scale; SES-17: Social Desirability Scale; SPIRIT: Standard protocol items: recommendations for interventional trials; STAI: State-Trait-Anxiety Inventory; TAP (Testbatterie zur Aufmerksamkeitsprüfung): Test battery for executive functions; WISC-V: Wechsler Intelligence Scale for Children - Fifth Edition.

## Declarations

### Consent for publication

This manuscript does not contain any form of individual person's data, all data will be reported based on aggregated group data.

### Availability of data and material

The datasets generated and/or analyzed during the current study are not publicly available due to sensitive patient information, such as sociodemographic information, birth date and comorbidities, but aggregated group data can be made available upon request.

### Competing interests statement

The authors declare that they have no competing financial or non-financial interests.

## Funding

1  
2  
3 This work was supported by the Deutsche Forschungsgemeinschaft (DFG, German Research  
4 Foundation) – Grant GR4753/2-1 to E.G. The funding body played no role in the design of the study or  
5 writing of the manuscript or the decision to submit the report for publication.  
6

### 7 **Authors' contributions**

8 EG, LF, GSK and CP contributed to the study design. Data management will be conducted by LF and  
9 EG and data analysis and interpretation will be performed by LF, EG, FO, GSK, JB, MSR and CP. EG  
10 and LF wrote the study protocol. All authors read and critically revised the draft of the paper and  
11 approved the final version of this manuscript.  
12

### 13 **Acknowledgements**

14 We are grateful to Carolin Zsigo for the assistance during the implementation of the experiment. We  
15 wish to thank Petra Wagenbüchler for her assistance in data collection. We further would like to thank  
16 Dr. Lauriane Vulliez and Dr. Monika Szymanska for providing BAPS-Ado and BAPS-Adult picture  
17 sets.  
18

### 19 **Trial Sponsor**

20 Department of Child and Adolescent Psychiatry, Psychosomatics and Psychotherapy, University  
21 Hospital, LMU Munich (Primary Sponsor)  
22 Nussbaumstraße 5a  
23 80336 Munich  
24 Germany  
25 Contact Name: PD Dr. Ellen Greimel (Principal Investigator & Contact for Public/Scientific Queries)  
26 Phone: +49 89 4400 56952  
27 Email: ellen.greimel@med.uni-muenchen.de  
28  
29  
30  
31  
32  
33  
34  
35  
36  
37  
38  
39  
40  
41  
42  
43  
44  
45  
46  
47  
48  
49  
50  
51  
52  
53  
54  
55  
56  
57  
58  
59  
60

## References

1. Kessler RC, Bromet EJ. The epidemiology of depression across cultures. *Annu Rev Publ Health*. 2013;34:119-38.
2. Avenevoli S, Knight E, Kessler RC, Merikangas KR. Epidemiology of depression in children and adolescents. In: Abela JRZ, Hankin BL, editors. *Handbook of depression in children and adolescents*. New York: Guilford; 2008. p. 6-32.
3. Kovacs M, Yaroslavsky I. Practitioner review: Dysphoria and its regulation in child and adolescent depression. *J Child Psychol Psychiatry*. 2014;55(7):741-57.
4. Ochsner KN, Gross JJ. The cognitive control of emotion. *Trends Cogn Sci*. 2005;9(5):242-9.
5. Ahmed SP, Bittencourt-Hewitt A, Sebastian CL. Neurocognitive bases of emotion regulation development in adolescence. *Dev Cogn Neurosci*. 2015;15:11-25.
6. Compton SN, March JS, Brent D, Albano AM, Weersing VR, Curry J. Cognitive-behavioral psychotherapy for anxiety and depressive disorders in children and adolescents: an evidence-based medicine review. *J Am Acad Child Psy*. 2004;43(8):930-59.
7. Curry J, Rohde P, Simons A, Silva S, Vitiello B, Kratochvil C, et al. Predictors and moderators of acute outcome in the Treatment for Adolescents with Depression Study (TADS). *J Am Acad Child Psy*. 2006;45(12):1427-39.
8. Thapar A, Collishaw S, Pine DS, Thapar AK. Depression in adolescence. *Lancet*. 2012;379(9820):1056-67.
9. Berking M, Ebert D, Cuijpers P, Hofmann SG. Emotion regulation skills training enhances the efficacy of inpatient cognitive behavioral therapy for major depressive disorder: a randomized controlled trial. *Psychother Psychosom*. 2013;82:234-45.
10. Berking M, Wupperman P, Reichardt A, Pejic T, Dippel A, Znoj H. Emotion-regulation skills as a treatment target in psychotherapy. *Behav Res Ther*. 2008;46:1230-7.
11. Cutuli D. Cognitive reappraisal and expressive suppression strategies role in the emotion regulation: an overview on their modulatory effects and neural correlates. *Front Syst Neurosci*. 2014;8:175.
12. Garnefski N, Kraaij V. The cognitive emotion regulation questionnaire: Psychometric Features and Prospective Relationships with Depression and Anxiety in Adults. *Eur J Psychol Assess*. 2007;23(3):141-9.
13. Joormann J, Gotlib IH. Emotion regulation in depression: relation to cognitive inhibition. *Cognition Emotion*. 2010;24(2):281-98.
14. Schäfer JÖ, Naumann E, Holmes EA, Tuschen-Caffier B, Samson AC. Emotion regulation strategies in depressive and anxiety symptoms in youth: A meta-analytic review. *J Youth Adolescence*. 2017;46(2):261-76.
15. Cohen N, Daches S, Mor N, Henik A. Inhibition of negative content - a shared process in rumination and reappraisal. *Front Psychol*. 2014; 5: 622.
16. Dillon DG, Pizzagalli DA. Evidence of successful modulation of brain activation and subjective experience during reappraisal of negative emotion in unmedicated depression. *Psychiatry Res Neuroimaging*. 2013;212(2):99-107.
17. Sheline YI, Barch DM, Price JL, Rundle MM, Vaishnavi SN, Snyder AZ, et al. The default mode network and self-referential processes in depression. *P Natl Acad Sci*. 2009;106(6):1942-7.
18. Zilverstand A, Parvaz MA, Goldstein RZ. Neuroimaging cognitive reappraisal in clinical populations to define neural targets for enhancing emotion regulation. A systematic review. *Neuroimage*. 2017;151:105-16.
19. Greimel E, Schulte-Ruether M, Fink GR, Piefke M, Herpertz-Dahlmann B, Konrad K. Development of neural correlates of empathy from childhood to early adulthood: an fMRI study in boys and adult men. *J Neural Transm*. 2010;117(6):781-91.
20. DeCicco JM, O'Toole LJ, Dennis TA. The late positive potential as a neural signature for cognitive reappraisal in children. *Dev Neuropsychol*. 2014;39(7):497-515.

- 1
- 2
- 3 21. Moser JS, Kropfingier JW, Dietz J, Simons RF. Electrophysiological correlates of decreasing
- 4 and increasing emotional responses to unpleasant pictures. *Psychophysiology*. 2009;46:17-27.
- 5 22. Paul S, Simon D, Kniesche R, Kathmann N, Endrass T. Timing effects of antecedent-and
- 6 response-focused emotion regulation strategies. *Biol Psychol*. 2013;94(1):136-42.
- 7 23. Dennis TA, Hajcak G. The late positive potential: a neurophysiological marker for emotion
- 8 regulation in children. *J Child Psychol Psych*. 2009;50(11):1373-83.
- 9 24. Wessing I, Rehbein MA, Romer G, Achtergarde S, Dobel C, Zwitserlood P, et al. Cognitive
- 10 emotion regulation in children: reappraisal of emotional faces modulates neural source activity in a
- 11 frontoparietal network. *Dev Cogn Neurosci*. 2015;13:1-10.
- 12 25. Bylsma LM. Emotional Reactivity and Regulation in Current and Remitted Depression: An
- 13 Event Related Potential Study [Dissertation]: University of South Florida; 2012.
- 14 26. Kudinova AY, Owens M, Burkhouse KL, Barretto KM, Bonanno GA, Gibb BE. Differences in
- 15 emotion modulation using cognitive reappraisal in individuals with and without suicidal ideation: An
- 16 ERP study. *Cognition Emotion*. 2016;30(5):999-1007.
- 17 27. Bebko GM, Franconeri SL, Ochsner KN, Chiao JY. Attentional deployment is not necessary for
- 18 successful emotion regulation via cognitive reappraisal or expressive suppression. *Emotion*.
- 19 2014;14(3):504-12.
- 20 28. Manera V, Samson AC, Pehrs C, Lee IA, Gross JJ. The eyes have it: The role of attention in
- 21 cognitive reappraisal of social stimuli. *Emotion*. 2014;14(5):833-9.
- 22 29. Strauss GP, Ossenfort KL, Whearty KM. Reappraisal and distraction emotion regulation
- 23 strategies are associated with distinct patterns of visual attention and differing levels of cognitive
- 24 demand. *Plos One*. 2016;11(11):e0162290.
- 25 30. Denny BT, Ochsner KN. Behavioral effects of longitudinal training in cognitive reappraisal.
- 26 *Emotion*. 2014;14(2):425-33.
- 27 31. De Witte NA, Sütterlin S, Braet C, Mueller SC. Psychophysiological correlates of emotion
- 28 regulation training in adolescent anxiety: Evidence from the novel PIER task. *J Affect Disord*.
- 29 2017;214:89-96.
- 30 32. World Health Organization. The ICD-10 classification of mental and behavioural disorders:
- 31 clinical descriptions and diagnostic guidelines: Geneva: World Health Organization; 1992.
- 32 33. Schönfelder S, Kanske P, Heissler J, Wessa M. Time course of emotion-related responding
- 33 during distraction and reappraisal. *SCAN*. 2014;9(9):1310-9.
- 34 34. Paul S, Simon D, Endrass T, Kathmann N. Altered emotion regulation in obsessive-compulsive
- 35 disorder as evidenced by the late positive potential. *Psychol Med*. 2016;46(1):137-47.
- 36 35. Sarlo M, Ubel S, Leutgeb V, Schienle A. Cognitive reappraisal fails when attempting to reduce
- 37 the appetitive value of food: an ERP study. *Biol Psychol*. 2013;94(3):507-12.
- 38 36. Greimel E, Piechaczek C, Schulte-Rüther M, Feldmann L, Schulte-Körne G. The role of
- 39 attentional deployment during distancing in adolescents with major depression. *BRAT*.
- 40 2020;126:103554.
- 41 37. Bradley MM, Lang PJ. Measuring emotion: the self-assessment manikin and the semantic
- 42 differential. *J Behav Ther Exp Psy*. 1994;25(1):49-59.
- 43 38. Suk H-J. Color and Emotion-a study on the affective judgment across media and in relation to
- 44 visual stimuli [Dissertation]: Universität Mannheim; 2006.
- 45 39. Lang PJ. Behavioral treatment and bio-behavioral assessment: Computer applications. In:
- 46 Sidowski JB, Johnson JH, Williams TA, editors. *Technology in mental health care delivery systems*.
- 47 Norwood, NJ: Ablex; 1980. p. 119-37.
- 48 40. Musser ED, Galloway-Long HS, Frick PJ, Nigg JT. Emotion regulation and heterogeneity in
- 49 attention-deficit/hyperactivity disorder. *J Am Acad Child Adolesc Psychiatry*. 2013;52(2):163-71.e2.
- 50 41. Reichel VA, Schneider N, Grünewald B, Kienast T, Pfeiffer E, Lehmkuhl U, et al. "Glass fairies"
- 51 and "bone children": Adolescents and young adults with anorexia nervosa show positive reactions
- 52 towards extremely emaciated body pictures measured by the startle reflex paradigm.
- 53 *Psychophysiology*. 2014;51(2):168-77.
- 54
- 55
- 56
- 57
- 58
- 59
- 60

- 1
- 2
- 3 42. Patrick CJ, Lavoro SA. Ratings of emotional response to pictorial stimuli: Positive and negative
- 4 affect dimensions. *Motiv Emotion*. 1997;21(4):297-321.
- 5 43. Lang PJ, Bradley MM, Cuthbert BN. International affective picture system (IAPS): Affective
- 6 ratings of pictures and instruction manual. Technical Report A-8. Gainesville, FL: University of Florida;
- 7 2008.
- 8 44. Szymanska M, Monnin J, Noiret N, Tio G, Galdon L, Laurent E, et al. The Besançon affective
- 9 picture set-adolescents (the BAPS-Ado): development and validation. *Psychiatry Res*.
- 10 2015;228(3):576-84.
- 11 45. Szymanska M, Comte A, Tio G, Vidal C, Monnin J, Smith CC, et al. The Besançon affective
- 12 picture set-adult (BAPS-Adult): Development and validation. *Psychiatry Res*. 2019;271:31-8.
- 13 46. Margraf J, Cwik JC, Pflug V, Schneider S. Structured clinical interviews for mental disorders
- 14 across the lifespan: Psychometric quality and further developments of the DIPS Open Access
- 15 interviews. [Strukturierte klinische Interviews zur Erfassung psychischer Störungen über die
- 16 Lebensspanne: Gütekriterien und Weiterentwicklungen der DIPS-Verfahren.]. *Z Klin Psychol*
- 17 *Psychopathol Psychother*. 2017;46(3):176-86.
- 18 47. Margraf J, Cwik JC, Suppiger A, Schneider S. DIPS Open Access: Diagnostic Interview for
- 19 Mental Disorders. [DIPS Open Access: Diagnostisches Interview bei psychischen Störungen.] Bochum:
- 20 Mental Health Research and Treatment Center; 2017.
- 21 48. Weiß RH. CFT 20-R, Grundintelligenztest Skala 2 - Revision (2. Auflage)2019.
- 22 49. Wechsler D. Wechsler Intelligence Scale for Children—Fifth Edition (WISC-V). Frankfurt/Main,
- 23 Nürnberg, Leipzig: Pearson; 2017.
- 24 50. Kühner C, Huffziger S, Nolen-Hoeksema S. Response Styles Questionnaire-Deutsche Version:
- 25 RSQ-D; Manual: Hogrefe; 2007.
- 26 51. Hautzinger M, Keller F, Kühner C. Das Beck Depressionsinventar II. Deutsche Bearbeitung und
- 27 Handbuch zum BDI-II. Frankfurt am Main: Harcourt Test Services; 2006.
- 28 52. Cohen S, Kamarck T, Mermelstein R. A global measure of perceived stress. *J Health Soc*
- 29 *Behav*. 1983;24(4):385-96.
- 30 53. Ebesutani C, Regan J, Smith A, Reise S, Higa-McMillan C, Chorpita BF. The 10-Item Positive
- 31 and Negative Affect Schedule for Children, Child and Parent Shortened Versions: Application of Item
- 32 Response Theory for More Efficient Assessment. *J Psychopathol Behav*. 2012;34(2):191-203.
- 33 54. Stöber J. Die Soziale-Erwünschtheits-Skala-17 (SES-17): Entwicklung und erste Befunde zu
- 34 Reliabilität und Validität. *Diagnostica*. 1999;45(4):173-7.
- 35 55. Koster EH, De Lissnyder E, Derakshan N, De Raedt R. Understanding depressive rumination
- 36 from a cognitive science perspective: The impaired disengagement hypothesis. *Clin Psychol Rev*.
- 37 2011;31(1):138-45.
- 38 56. Sanchez-Lopez A, Everaert J, Van Put J, De Raedt R, Koster EHW. Eye-gaze contingent
- 39 attention training (ECAT): Examining the causal role of attention regulation in reappraisal and
- 40 rumination. *Biol Psychol*. 2019;142:116-25.
- 41 57. Cohen N, Ochsner KN. From surviving to thriving in the face of threats: the emerging science
- 42 of emotion regulation training. *Curr Opin Behav Sci*. 2018;24:143-55.
- 43 58. Miyake A, Friedman NP, Emerson MJ, Witzki AH, Howerter A, Wager TD. The unity and
- 44 diversity of executive functions and their contributions to complex “frontal lobe” tasks: A latent
- 45 variable analysis. *Cognitive Psychol*. 2000;41(1):49-100.
- 46 59. Friedman NP, Miyake A, Young SE, DeFries JC, Corley RP, Hewitt JK. Individual differences in
- 47 executive functions are almost entirely genetic in origin. *J Exp Psychol Gen*. 2008;137(2):201-25.
- 48 60. Zimmermann P, Fimm B. TAP Testbatterie zur Aufmerksamkeitsprüfung Version 2.3: Vera
- 49 Fimm, Psychologische Testsysteme; 2012.
- 50 61. Grob A, Smolenski C. Fragebogen zur Erhebung der Emotionsregulation bei Kindern und
- 51 Jugendlichen (FEEL-KJ). 2. Aktualisierte und ergänzte Auflage. Bern: Huber Verlag; 2009.
- 52 62. Axelson DA, Birmaher B. Relation between anxiety and depressive disorders in childhood and
- 53 adolescence. *Depress Anxiety*. 2001;14(2):67-78.
- 54
- 55
- 56
- 57
- 58
- 59
- 60



- 1  
2  
3 63. Laux L, Glanzmann P, Schaffner P, Spielberger C. Das State-Trait-Angstinventar Weinheim, Germany: Beltz; 1981.
- 4  
5 64. Döpfner M, Achenbach TM, Plück J, Kinnen C, Plück J. CBCL/6-18R-TRF/6-18R-YSR/11-18R: Deutsche Schulalter-Formen der Child Behavior Checklist von Thomas M. Achenbach:  
6  
7 Elternfragebogen über das Verhalten von Kindern und Jugendlichen (CBCL/6-18R), Lehrerfragebogen  
8 über das Verhalten von Kindern und Jugendlichen (TRF/6-18R), Fragebogen für Jugendliche (YSR/11-  
9 18R). Göttingen: Hogrefe; 2014.
- 10  
11 65. Moran TP, Jendrusina AA, Moser JS. The psychometric properties of the late positive  
12 potential during emotion processing and regulation. *Brain Res.* 2013;1516:66-75.
- 13 66. Siegle GJ, Price RB, Jones NP, Ghinassi F, Painter T, Thase ME. You gotta work at it: Pupillary  
14 indices of task focus are prognostic for response to a neurocognitive intervention for rumination in  
15 depression. *Clin Psychol Sci.* 2014;2(4):455-71.
- 16  
17 67. Murrar S, Brauer M. Mixed model analysis of variance. In: Frey BB, editor. The SAGE  
18 encyclopedia of educational research, measurement, and evaluation. Thousand Oaks: SAGE  
19 Publications, Inc.; 2018. p. 1075-8.
- 20  
21 68. Aldao A, Nolen-Hoeksema S, Schweizer S. Emotion-regulation strategies across  
22 psychopathology: A meta-analytic review. *Clin Psychol Rev.* 2010;30(2):217-37.
- 23 69. Adornetto C, In-Albon T, Schneider S. Diagnostik im Kindes- und Jugendalter anhand  
24 strukturierter Interviews: Anwendung und Durchführung des Kinder-DIPS. *Klin Diagnostik u*  
25 *Evaluation.* 2008;1(4):363-77.
- 26  
27 70. Dolle K, Schulte-Körne G, O'Leary AM, von Hofacker N, Izat Y, Allgaier A-K. The Beck  
28 Depression Inventory-II in adolescent mental health patients: Cut-off scores for detecting depression  
29 and rating severity. *Psychiat Research.* 2012;200(2-3):843-8.
- 30  
31 71. Stockings E, Degenhardt L, Lee YY, Mihalopoulos C, Liu A, Hobbs M, et al. Symptom screening  
32 scales for detecting major depressive disorder in children and adolescents: a systematic review and  
33 meta-analysis of reliability, validity and diagnostic utility. *J Affect Disorders.* 2015;174:447-63.
- 34  
35 72. Löwe B, Kroenke K, Gräfe K. Detecting and monitoring depression with a two-item  
36 questionnaire (PHQ-2). *J Psychosom Res.* 2005;58(2):163-71.
- 37  
38 73. Klein EM, Brähler E, Dreier M, Reinecke L, Müller KW, Schmutz G, et al. The German version  
39 of the Perceived Stress Scale—psychometric characteristics in a representative German community  
40 sample. *BMC Psychiatry.* 2016;16:159.
- 41  
42 74. Conway M, Csank PA, Holm SL, Blake CK. On assessing individual differences in rumination on  
43 sadness. *J Pers Assess.* 2000;75(3):404-25.
- 44  
45 75. Stöber J. The Social Desirability Scale-17 (SDS-17): Convergent validity, discriminant validity,  
46 and relationship with age. *Eur J Psychol Assess.* 2001;17(3):222-32.
- 47  
48  
49  
50  
51  
52  
53  
54  
55  
56  
57  
58  
59  
60

**Table 1.** Overview over diagnostic measures and all variables of the study

| Function               | Measure                      | Instrument            | Reliability/Validity                                                                                                                                                                                                                                                                   | T0 Baseline/<br>Diagnostics | T1 | T2 | T3 | T4 | 2-week Follow-up |
|------------------------|------------------------------|-----------------------|----------------------------------------------------------------------------------------------------------------------------------------------------------------------------------------------------------------------------------------------------------------------------------------|-----------------------------|----|----|----|----|------------------|
| <b>Diagnostic</b>      | Diagnosis                    | Kinder-DIPS (A)       | Retest-Reliability for depressive disorders=.95 (Kappa) for the predecessor version of the Kinder-Dips for DSM-IV diagnoses in children and adolescents[69]                                                                                                                            | X                           |    |    |    |    |                  |
|                        | Intelligence quotient (IQ)   | CFT-20-R (A) (part 1) | Cronbach's $\alpha$ =.92 for the first part in children, adolescents and adults[48]                                                                                                                                                                                                    | X                           |    |    |    |    |                  |
| <b>Primary Outcome</b> | Depressive Symptoms          | BDI-II (A)            | Cronbach's $\alpha$ =.94 in an adolescent population[70]; pooled estimate for internal reliability: .86; discriminative validity - pooled estimate for sensitivity and specificity: .81; based on meta-analytic data in non-clinical and clinical child and adolescent populations[71] | X                           |    |    |    | X  |                  |
|                        | Negative and positive Affect | PANAS-C-SF (A)        | Cronbach's $\alpha$ =.86 for positive affect scale and Cronbach's $\alpha$ =.82 for negative affect scale; divergent validity - correlation between positive and negative affect scales: -.13; based on data in an adolescent population[53]                                           |                             | X  | X  | X  | X  | X                |
|                        | Perceived Stress             | PSS-10 (A)            | Cronbach's $\alpha$ =.84; construct validity of .59 with the PHQ-2 [Patient Health Questionnaire; 72]; based on a sample of adolescents and adults for the original version of the PSS-10[73]                                                                                          |                             | X  | X  | X  | X  | X                |
|                        | Rumination                   | RSQ-D (A)             | Cronbach's $\alpha$ =.77 for self-focused rumination scale and Cronbach's                                                                                                                                                                                                              | X                           |    |    |    | X  | X                |

|                              |                                                                         |                                                                                                     |                                                                                                                                                                                                                                  |   |   |   |   |   |  |
|------------------------------|-------------------------------------------------------------------------|-----------------------------------------------------------------------------------------------------|----------------------------------------------------------------------------------------------------------------------------------------------------------------------------------------------------------------------------------|---|---|---|---|---|--|
|                              |                                                                         |                                                                                                     | $\alpha=.88$ for symptom-focused rumination; convergent validity of .52 for symptom-focused rumination and .72 for self-focused rumination with the RSS [Rumination on Sadness Scale; 74]; based on depressed adult patients[50] |   |   |   |   |   |  |
| <b>Secondary Outcome</b>     | Affective behavioral responses to pictures                              | SAM Rating Scale (A) of valence                                                                     | Cronbach's $\alpha$ for SAM ratings of the stimuli applied in the current study will be calculated based on the present sample                                                                                                   |   | X | X | X | X |  |
|                              | LPP (Late Positive Potential)                                           | (A)                                                                                                 | n.a.                                                                                                                                                                                                                             |   | X | X | X | X |  |
|                              | Gaze fixations in emotional areas of interest                           | (A)                                                                                                 | n.a.                                                                                                                                                                                                                             |   | X | X | X | X |  |
| <b>Confounding Variables</b> | Social Desirability                                                     | SES-17 (A)                                                                                          | Cronbach's $\alpha=.78$ in a young adult population[54, 75]                                                                                                                                                                      | X |   |   |   |   |  |
| <b>Mediators</b>             | State rumination during training                                        | Questionnaire (A) applied in A Sanchez-Lopez, J Everaert, J Van Put, R De Raedt and EHW Koster [56] | Cronbach's $\alpha=.72$ to .73; based on data in a young adult population[56]                                                                                                                                                    |   | X | X | X | X |  |
|                              | Habitual emotion regulation strategies                                  | FEEL-KJ (A)                                                                                         | Cronbach's $\alpha=.93$ for Adaptive emotion regulation scale and Cronbach's $\alpha=.82$ for Maladaptive emotion regulation scale in children and adolescents[61]                                                               | X |   |   |   |   |  |
|                              | Executive Function abilities (Set shifting, Working Memory, Inhibition) | TAP 2.3 (A)                                                                                         | Odd-even- Reliability for reaction times in adolescents: .791 for working memory, .952 for flexibility, .911 for Go/nogo for trials applied in the current study[60]                                                             | X |   |   |   |   |  |



|                   |                         |                |                                                                                                                          |   |  |  |  |  |  |
|-------------------|-------------------------|----------------|--------------------------------------------------------------------------------------------------------------------------|---|--|--|--|--|--|
| <b>Moderators</b> | Trait and state anxiety | STAI (A)       | Cronbach's $\alpha=.91$ for STAI-S scale and Cronbach's $\alpha\geq.89$ for STAI-T scale in adolescents/young adults[63] | X |  |  |  |  |  |
|                   | Psychopathology         | CBCL 6-18R (P) | Cronbach's $\alpha=.93$ for total behavior problem scale based on a sample of children and adolescents[64]               | X |  |  |  |  |  |

**Note.** Applied to A=Adolescent P=Parent; Abbreviations: Kinder-DIPS (Diagnostisches Interview bei psychischen Störungen im Kindes- und Jugendalter): Diagnostic interview for psychiatric disorders for children and adolescents; CFT-20-R (revidierte Grundintelligenztest Skala 2): Culture fair intelligence test; BDI-II: Beck depression inventory; PANAS-C-SF: Negative Affect Scale and Positive Affect Scale for Children Shortened Version for Children Shortened Version; PSS-10: Perceived Stress Scale 10; RSQ-D: German Version of the Response Styles Questionnaire; SAM: self-assessment manikin rating scale; n.a.: not applicable; SES-17: Social Desirability Scale; FEEL-KJ (Fragebogen zur Erhebung der Emotionsregulation bei Kindern und Jugendlichen): Questionnaire for the assessment of emotion regulation in children and adolescents; TAP (Testbatterie zur Aufmerksamkeitsprüfung): Test battery for executive functions; STAI: State-Trait-Anxiety Inventory; CBCL 6-18R: Child Behavior Checklist for the ages 6-18.

1  
2  
3  
4  
5  
6  
7  
8  
9  
10  
11  
12  
13  
14  
15  
16  
17  
18  
19  
20  
21  
22  
23  
24  
25  
26  
27  
28  
29  
30  
31  
32  
33  
34  
35  
36  
37  
38  
39  
40  
41  
42  
43  
44  
45  
46  
47  
48  
49  
50  
51  
52  
53  
54  
55  
56  
57  
58  
59  
60

## Figure Legends

**Figure 1.** Overview of the KONNI study design

**Figure 2.** Experimental time course. Exemplary illustration of a trial belonging to the CR training (negative-reappraise condition). The picture shown is exemplary and not part of the picture databases used in the study. Abbreviations: SAM: self-assessment manikin rating scale (as a portrait version).

1  
2  
3  
4  
5  
6  
7  
8  
9  
10  
11  
12  
13  
14  
15  
16  
17  
18  
19  
20  
21  
22  
23  
24  
25  
26  
27  
28  
29  
30  
31  
32  
33  
34  
35  
36  
37  
38  
39  
40  
41  
42  
43  
44  
45  
46  
47  
48  
49  
50  
51  
52  
53  
54  
55  
56  
57  
58  
59  
60



1  
2  
3  
4  
5  
6  
7  
8  
9  
10  
11  
12  
13  
14  
15  
16  
17  
18  
19  
20  
21  
22  
23  
24  
25  
26  
27  
28  
29  
30  
31  
32  
33  
34  
35  
36  
37  
38  
39  
40  
41  
42  
43  
44  
45  
46  
47  
48  
49  
50  
51  
52  
53  
54  
55  
56  
57  
58  
59  
60





STANDARD PROTOCOL ITEMS: RECOMMENDATIONS FOR INTERVENTIONAL TRIALS

SPIRIT 2013 Checklist: Recommended items to address in a clinical trial protocol and related documents\*

| Section/item                      | Item No | Description                                                                                                                                                                                                                                                                                                                                                    |
|-----------------------------------|---------|----------------------------------------------------------------------------------------------------------------------------------------------------------------------------------------------------------------------------------------------------------------------------------------------------------------------------------------------------------------|
| <b>Administrative information</b> |         |                                                                                                                                                                                                                                                                                                                                                                |
| Title                             | 1       | Descriptive title identifying the study design, population, interventions, and, if applicable, trial acronym ( <b>p. 1 Title</b> )                                                                                                                                                                                                                             |
| Trial registration                | 2a      | Trial identifier and registry name. If not yet registered, name of intended registry ( <b>p. 2 “Trial Registration”</b> )                                                                                                                                                                                                                                      |
|                                   | 2b      | All items from the World Health Organization Trial Registration Data Set ( <b>throughout the entire study protocol</b> )                                                                                                                                                                                                                                       |
| Protocol version                  | 3       | Date and version identifier ( <b>n.a., first version of the protocol</b> )                                                                                                                                                                                                                                                                                     |
| Funding                           | 4       | Sources and types of financial, material, and other support ( <b>p. 18, section “funding”</b> )                                                                                                                                                                                                                                                                |
| Roles and responsibilities        | 5a      | Names, affiliations, and roles of protocol contributors ( <b>p. 18, section “author’s contributions”</b> )                                                                                                                                                                                                                                                     |
|                                   | 5b      | Name and contact information for the trial sponsor ( <b>p. 18, section “trial sponsor”</b> )                                                                                                                                                                                                                                                                   |
|                                   | 5c      | Role of study sponsor and funders, if any, in study design; collection, management, analysis, and interpretation of data; writing of the report; and the decision to submit the report for publication, including whether they will have ultimate authority over any of these activities ( <b>p. 18, section “funding”</b> )                                   |
|                                   | 5d      | Composition, roles, and responsibilities of the coordinating centre, steering committee, endpoint adjudication committee, data management team, and other individuals or groups overseeing the trial, if applicable (see Item 21a for data monitoring committee) ( <b>n.a.</b> )                                                                               |
| <b>Introduction</b>               |         |                                                                                                                                                                                                                                                                                                                                                                |
| Background and rationale          | 6a      | Description of research question and justification for undertaking the trial, including summary of relevant studies (published and unpublished) examining benefits and harms for each intervention ( <b>pp. 3-5; sections: “Introduction”, “Cognitive reappraisal in depressed individuals”, “Trainability of cognitive reappraisal”, “Aim of the study”</b> ) |

|    |                                                           |     |                                                                                                                                                                                                                                                                                                                                                                                                                                                    |
|----|-----------------------------------------------------------|-----|----------------------------------------------------------------------------------------------------------------------------------------------------------------------------------------------------------------------------------------------------------------------------------------------------------------------------------------------------------------------------------------------------------------------------------------------------|
| 1  |                                                           | 6b  | Explanation for choice of comparators ( <b>p. 9, section “Control training”</b> )                                                                                                                                                                                                                                                                                                                                                                  |
| 2  |                                                           |     |                                                                                                                                                                                                                                                                                                                                                                                                                                                    |
| 3  |                                                           |     |                                                                                                                                                                                                                                                                                                                                                                                                                                                    |
| 4  |                                                           |     |                                                                                                                                                                                                                                                                                                                                                                                                                                                    |
| 5  | Objectives                                                | 7   | Specific objectives or hypotheses ( <b>p. 5, section “Aim of the study”</b> )                                                                                                                                                                                                                                                                                                                                                                      |
| 6  |                                                           |     |                                                                                                                                                                                                                                                                                                                                                                                                                                                    |
| 7  | Trial design                                              | 8   | Description of trial design including type of trial (eg, parallel group, crossover, factorial, single group), allocation ratio, and framework (eg, superiority, equivalence, noninferiority, exploratory) ( <b>p. 6, section “Design”</b> )                                                                                                                                                                                                        |
| 8  |                                                           |     |                                                                                                                                                                                                                                                                                                                                                                                                                                                    |
| 9  |                                                           |     |                                                                                                                                                                                                                                                                                                                                                                                                                                                    |
| 10 |                                                           |     |                                                                                                                                                                                                                                                                                                                                                                                                                                                    |
| 11 |                                                           |     |                                                                                                                                                                                                                                                                                                                                                                                                                                                    |
| 12 |                                                           |     |                                                                                                                                                                                                                                                                                                                                                                                                                                                    |
| 13 | <b>Methods: Participants, interventions, and outcomes</b> |     |                                                                                                                                                                                                                                                                                                                                                                                                                                                    |
| 14 |                                                           |     |                                                                                                                                                                                                                                                                                                                                                                                                                                                    |
| 15 | Study setting                                             | 9   | Description of study settings (eg, community clinic, academic hospital) and list of countries where data will be collected. Reference to where list of study sites can be obtained ( <b>p. 6, section “Recruitment”</b> )                                                                                                                                                                                                                          |
| 16 |                                                           |     |                                                                                                                                                                                                                                                                                                                                                                                                                                                    |
| 17 |                                                           |     |                                                                                                                                                                                                                                                                                                                                                                                                                                                    |
| 18 |                                                           |     |                                                                                                                                                                                                                                                                                                                                                                                                                                                    |
| 19 | Eligibility criteria                                      | 10  | Inclusion and exclusion criteria for participants. If applicable, eligibility criteria for study centres and individuals who will perform the interventions (eg, surgeons, psychotherapists) ( <b>pp. 6-7, sections “Participants”, “Procedure”</b> )                                                                                                                                                                                              |
| 20 |                                                           |     |                                                                                                                                                                                                                                                                                                                                                                                                                                                    |
| 21 |                                                           |     |                                                                                                                                                                                                                                                                                                                                                                                                                                                    |
| 22 |                                                           |     |                                                                                                                                                                                                                                                                                                                                                                                                                                                    |
| 23 |                                                           |     |                                                                                                                                                                                                                                                                                                                                                                                                                                                    |
| 24 |                                                           |     |                                                                                                                                                                                                                                                                                                                                                                                                                                                    |
| 25 | Interventions                                             | 11a | Interventions for each group with sufficient detail to allow replication, including how and when they will be administered ( <b>pp. 8-9, sections “Cognitive Reappraisal Training”, “Control Training”</b> )                                                                                                                                                                                                                                       |
| 26 |                                                           |     |                                                                                                                                                                                                                                                                                                                                                                                                                                                    |
| 27 |                                                           |     |                                                                                                                                                                                                                                                                                                                                                                                                                                                    |
| 28 |                                                           |     |                                                                                                                                                                                                                                                                                                                                                                                                                                                    |
| 29 |                                                           |     |                                                                                                                                                                                                                                                                                                                                                                                                                                                    |
| 30 |                                                           | 11b | Criteria for discontinuing or modifying allocated interventions for a given trial participant (eg, drug dose change in response to harms, participant request, or improving/worsening disease) ( <b>pp. 7-8, section “Procedure”; Fig. 1</b> )                                                                                                                                                                                                     |
| 31 |                                                           |     |                                                                                                                                                                                                                                                                                                                                                                                                                                                    |
| 32 |                                                           |     |                                                                                                                                                                                                                                                                                                                                                                                                                                                    |
| 33 |                                                           |     |                                                                                                                                                                                                                                                                                                                                                                                                                                                    |
| 34 |                                                           |     |                                                                                                                                                                                                                                                                                                                                                                                                                                                    |
| 35 |                                                           | 11c | Strategies to improve adherence to intervention protocols, and any procedures for monitoring adherence (eg, drug tablet return, laboratory tests) ( <b>p. 9, section “Cognitive Reappraisal Training”</b> )                                                                                                                                                                                                                                        |
| 36 |                                                           |     |                                                                                                                                                                                                                                                                                                                                                                                                                                                    |
| 37 |                                                           |     |                                                                                                                                                                                                                                                                                                                                                                                                                                                    |
| 38 |                                                           |     |                                                                                                                                                                                                                                                                                                                                                                                                                                                    |
| 39 |                                                           |     |                                                                                                                                                                                                                                                                                                                                                                                                                                                    |
| 40 |                                                           | 11d | Relevant concomitant care and interventions that are permitted or prohibited during the trial ( <b>p. 8, section “Procedure”</b> )                                                                                                                                                                                                                                                                                                                 |
| 41 |                                                           |     |                                                                                                                                                                                                                                                                                                                                                                                                                                                    |
| 42 |                                                           |     |                                                                                                                                                                                                                                                                                                                                                                                                                                                    |
| 43 | Outcomes                                                  | 12  | Primary, secondary, and other outcomes, including the specific measurement variable (eg, systolic blood pressure), analysis metric (eg, change from baseline, final value, time to event), method of aggregation (eg, median, proportion), and time point for each outcome. Explanation of the clinical relevance of chosen efficacy and harm outcomes is strongly recommended ( <b>p. 10, sections “Primary outcomes”, “Secondary outcomes”</b> ) |
| 44 |                                                           |     |                                                                                                                                                                                                                                                                                                                                                                                                                                                    |
| 45 |                                                           |     |                                                                                                                                                                                                                                                                                                                                                                                                                                                    |
| 46 |                                                           |     |                                                                                                                                                                                                                                                                                                                                                                                                                                                    |
| 47 |                                                           |     |                                                                                                                                                                                                                                                                                                                                                                                                                                                    |
| 48 |                                                           |     |                                                                                                                                                                                                                                                                                                                                                                                                                                                    |
| 49 |                                                           |     |                                                                                                                                                                                                                                                                                                                                                                                                                                                    |
| 50 |                                                           |     |                                                                                                                                                                                                                                                                                                                                                                                                                                                    |
| 51 |                                                           |     |                                                                                                                                                                                                                                                                                                                                                                                                                                                    |
| 52 | Participant timeline                                      | 13  | Time schedule of enrolment, interventions (including any run-ins and washouts), assessments, and visits for participants. A schematic diagram is highly recommended (see Figure) ( <b>Table 1; Fig. 1</b> )                                                                                                                                                                                                                                        |
| 53 |                                                           |     |                                                                                                                                                                                                                                                                                                                                                                                                                                                    |
| 54 |                                                           |     |                                                                                                                                                                                                                                                                                                                                                                                                                                                    |
| 55 |                                                           |     |                                                                                                                                                                                                                                                                                                                                                                                                                                                    |
| 56 |                                                           |     |                                                                                                                                                                                                                                                                                                                                                                                                                                                    |
| 57 |                                                           |     |                                                                                                                                                                                                                                                                                                                                                                                                                                                    |
| 58 |                                                           |     |                                                                                                                                                                                                                                                                                                                                                                                                                                                    |
| 59 |                                                           |     |                                                                                                                                                                                                                                                                                                                                                                                                                                                    |
| 60 |                                                           |     |                                                                                                                                                                                                                                                                                                                                                                                                                                                    |

|   |             |    |                                                                         |
|---|-------------|----|-------------------------------------------------------------------------|
| 1 |             |    |                                                                         |
| 2 | Sample size | 14 | Estimated number of participants needed to achieve study objectives     |
| 3 |             |    | and how it was determined, including clinical and statistical           |
| 4 |             |    | assumptions supporting any sample size calculations ( <b>pp. 12-13,</b> |
| 5 |             |    | <b>section “Calculation of sample size”</b> )                           |
| 6 |             |    |                                                                         |
| 7 | Recruitment | 15 | Strategies for achieving adequate participant enrolment to reach        |
| 8 |             |    | target sample size ( <b>p. 6, section “Recruitment”</b> )               |
| 9 |             |    |                                                                         |

### Methods: Assignment of interventions (for controlled trials)

#### Allocation:

|    |                |     |                                                                             |
|----|----------------|-----|-----------------------------------------------------------------------------|
| 14 |                |     |                                                                             |
| 15 | Sequence       | 16a | Method of generating the allocation sequence (eg, computer-                 |
| 16 | generation     |     | generated random numbers), and list of any factors for stratification.      |
| 17 |                |     | To reduce predictability of a random sequence, details of any planned       |
| 18 |                |     | restriction (eg, blocking) should be provided in a separate document        |
| 19 |                |     | that is unavailable to those who enrol participants or assign               |
| 20 |                |     | interventions ( <b>pp. 6-7, section “Procedure”</b> )                       |
| 21 |                |     |                                                                             |
| 22 |                |     |                                                                             |
| 23 | Allocation     | 16b | Mechanism of implementing the allocation sequence (eg, central              |
| 24 | concealment    |     | telephone; sequentially numbered, opaque, sealed envelopes),                |
| 25 | mechanism      |     | describing any steps to conceal the sequence until interventions are        |
| 26 |                |     | assigned ( <b>pp. 6-7, section “Procedure”</b> )                            |
| 27 |                |     |                                                                             |
| 28 |                |     |                                                                             |
| 29 | Implementation | 16c | Who will generate the allocation sequence, who will enrol participants,     |
| 30 |                |     | and who will assign participants to interventions ( <b>pp. 6-7, section</b> |
| 31 |                |     | <b>“Procedure”</b> )                                                        |
| 32 |                |     |                                                                             |
| 33 | Blinding       | 17a | Who will be blinded after assignment to interventions (eg, trial            |
| 34 | (masking)      |     | participants, care providers, outcome assessors, data analysts), and        |
| 35 |                |     | how ( <b>p. 7, section “Procedure”</b> )                                    |
| 36 |                |     |                                                                             |
| 37 |                | 17b | If blinded, circumstances under which unblinding is permissible, and        |
| 38 |                |     | procedure for revealing a participant’s allocated intervention during       |
| 39 |                |     | the trial ( <b>p. 7, section “Procedure”</b> )                              |
| 40 |                |     |                                                                             |
| 41 |                |     |                                                                             |

### Methods: Data collection, management, and analysis

|    |                 |     |                                                                             |
|----|-----------------|-----|-----------------------------------------------------------------------------|
| 42 |                 |     |                                                                             |
| 43 |                 |     |                                                                             |
| 44 | Data collection | 18a | Plans for assessment and collection of outcome, baseline, and other         |
| 45 | methods         |     | trial data, including any related processes to promote data quality (eg,    |
| 46 |                 |     | duplicate measurements, training of assessors) and a description of         |
| 47 |                 |     | study instruments (eg, questionnaires, laboratory tests) along with         |
| 48 |                 |     | their reliability and validity, if known. Reference to where data           |
| 49 |                 |     | collection forms can be found, if not in the protocol ( <b>pp. 8-10,</b>    |
| 50 |                 |     | <b>sections Cognitive Reappraisal Training”, “Control training”</b>         |
| 51 |                 |     | <b>“Diagnostic measures”; Table 1)</b>                                      |
| 52 |                 |     |                                                                             |
| 53 |                 |     |                                                                             |
| 54 |                 | 18b | Plans to promote participant retention and complete follow-up,              |
| 55 |                 |     | including list of any outcome data to be collected for participants who     |
| 56 |                 |     | discontinue or deviate from intervention protocols ( <b>p. 7-8, section</b> |
| 57 |                 |     | <b>“Procedure”</b> )                                                        |
| 58 |                 |     |                                                                             |
| 59 |                 |     |                                                                             |
| 60 |                 |     |                                                                             |

|    |                                 |     |                                                                               |
|----|---------------------------------|-----|-------------------------------------------------------------------------------|
| 1  |                                 |     |                                                                               |
| 2  | Data                            | 19  | Plans for data entry, coding, security, and storage, including any            |
| 3  | management                      |     | related processes to promote data quality (eg, double data entry;             |
| 4  |                                 |     | range checks for data values). Reference to where details of data             |
| 5  |                                 |     | management procedures can be found, if not in the protocol ( <b>p. 13,</b>    |
| 6  |                                 |     | <b>section “Data management and confidentiality”</b> )                        |
| 7  |                                 |     |                                                                               |
| 8  | Statistical                     | 20a | Statistical methods for analysing primary and secondary outcomes.             |
| 9  | methods                         |     | Reference to where other details of the statistical analysis plan can be      |
| 10 |                                 |     | found, if not in the protocol ( <b>pp. 14-15, section “Statistical</b>        |
| 11 |                                 |     | <b>analysis”</b> )                                                            |
| 12 |                                 |     |                                                                               |
| 13 |                                 | 20b | Methods for any additional analyses (eg, subgroup and adjusted                |
| 14 |                                 |     | analyses) ( <b>p. 15, section “Statistical analysis”</b> )                    |
| 15 |                                 |     |                                                                               |
| 16 |                                 | 20c | Definition of analysis population relating to protocol non-adherence          |
| 17 |                                 |     | (eg, as randomised analysis), and any statistical methods to handle           |
| 18 |                                 |     | missing data (eg, multiple imputation) ( <b>p. 14, section “Statistical</b>   |
| 19 |                                 |     | <b>analysis”</b> )                                                            |
| 20 |                                 |     |                                                                               |
| 21 |                                 |     |                                                                               |
| 22 |                                 |     |                                                                               |
| 23 | <b>Methods: Monitoring</b>      |     |                                                                               |
| 24 |                                 |     |                                                                               |
| 25 | Data monitoring                 | 21a | Composition of data monitoring committee (DMC); summary of its role           |
| 26 |                                 |     | and reporting structure; statement of whether it is independent from          |
| 27 |                                 |     | the sponsor and competing interests; and reference to where further           |
| 28 |                                 |     | details about its charter can be found, if not in the protocol.               |
| 29 |                                 |     | Alternatively, an explanation of why a DMC is not needed ( <b>n.a. A data</b> |
| 30 |                                 |     | <b>monitoring is not needed as the training (cognitive reappraisal</b>        |
| 31 |                                 |     | <b>training) and the control training are expected to carry no risks.</b> )   |
| 32 |                                 |     |                                                                               |
| 33 |                                 | 21b | Description of any interim analyses and stopping guidelines, including        |
| 34 |                                 |     | who will have access to these interim results and make the final              |
| 35 |                                 |     | decision to terminate the trial ( <b>n.a., As the training (cognitive</b>     |
| 36 |                                 |     | <b>reappraisal training) and the control training are expected to</b>         |
| 37 |                                 |     | <b>carry no risks, there are no stopping guidelines and interims</b>          |
| 38 |                                 |     | <b>analyses planned.</b> )                                                    |
| 39 |                                 |     |                                                                               |
| 40 |                                 |     |                                                                               |
| 41 |                                 |     |                                                                               |
| 42 |                                 |     |                                                                               |
| 43 | Harms                           | 22  | Plans for collecting, assessing, reporting, and managing solicited and        |
| 44 |                                 |     | spontaneously reported adverse events and other unintended effects            |
| 45 |                                 |     | of trial interventions or trial conduct ( <b>p. 8, Section “Procedure”</b> )  |
| 46 |                                 |     |                                                                               |
| 47 | Auditing                        | 23  | Frequency and procedures for auditing trial conduct, if any, and              |
| 48 |                                 |     | whether the process will be independent from investigators and the            |
| 49 |                                 |     | sponsor ( <b>n.a.</b> )                                                       |
| 50 |                                 |     |                                                                               |
| 51 |                                 |     |                                                                               |
| 52 | <b>Ethics and dissemination</b> |     |                                                                               |
| 53 |                                 |     |                                                                               |
| 54 | Research ethics                 | 24  | Plans for seeking research ethics committee/institutional review board        |
| 55 | approval                        |     | (REC/IRB) approval ( <b>p. 17, section “Ethics approval”</b> )                |
| 56 |                                 |     |                                                                               |
| 57 |                                 |     |                                                                               |
| 58 |                                 |     |                                                                               |
| 59 |                                 |     |                                                                               |
| 60 |                                 |     |                                                                               |



|    |                   |     |                                                                                  |
|----|-------------------|-----|----------------------------------------------------------------------------------|
| 1  |                   |     |                                                                                  |
| 2  | Protocol          | 25  | Plans for communicating important protocol modifications (eg,                    |
| 3  | amendments        |     | changes to eligibility criteria, outcomes, analyses) to relevant parties         |
| 4  |                   |     | (eg, investigators, REC/IRBs, trial participants, trial registries, journals,    |
| 5  |                   |     | regulators) ( <b>p. 5, section “Methods and analysis”</b> )                      |
| 6  |                   |     |                                                                                  |
| 7  | Consent or assent | 26a | Who will obtain informed consent or assent from potential trial                  |
| 8  |                   |     | participants or authorised surrogates, and how (see Item 32) ( <b>p. 6,</b>      |
| 9  |                   |     | <b>section “Procedure”</b> )                                                     |
| 10 |                   |     |                                                                                  |
| 11 |                   | 26b | Additional consent provisions for collection and use of participant data         |
| 12 |                   |     | and biological specimens in ancillary studies, if applicable ( <b>pp. 6-7,</b>   |
| 13 |                   |     | <b>section “Procedure”</b> )                                                     |
| 14 |                   |     |                                                                                  |
| 15 |                   |     |                                                                                  |
| 16 | Confidentiality   | 27  | How personal information about potential and enrolled participants will          |
| 17 |                   |     | be collected, shared, and maintained in order to protect confidentiality         |
| 18 |                   |     | before, during, and after the trial ( <b>p. 13, section “Data management</b>     |
| 19 |                   |     | <b>and confidentiality”</b> )                                                    |
| 20 |                   |     |                                                                                  |
| 21 |                   |     |                                                                                  |
| 22 | Declaration of    | 28  | Financial and other competing interests for principal investigators for          |
| 23 | interests         |     | the overall trial and each study site ( <b>p. 18, section “Competing</b>         |
| 24 |                   |     | <b>interests”</b> )                                                              |
| 25 |                   |     |                                                                                  |
| 26 |                   |     |                                                                                  |
| 27 | Access to data    | 29  | Statement of who will have access to the final trial dataset, and                |
| 28 |                   |     | disclosure of contractual agreements that limit such access for                  |
| 29 |                   |     | investigators ( <b>p. 13, section “Data management and</b>                       |
| 30 |                   |     | <b>confidentiality”</b> )                                                        |
| 31 |                   |     |                                                                                  |
| 32 |                   |     |                                                                                  |
| 33 | Ancillary and     | 30  | Provisions, if any, for ancillary and post-trial care, and for                   |
| 34 | post-trial care   |     | compensation to those who suffer harm from trial participation ( <b>n.a.</b> )   |
| 35 |                   |     |                                                                                  |
| 36 | Dissemination     | 31a | Plans for investigators and sponsor to communicate trial results to              |
| 37 | policy            |     | participants, healthcare professionals, the public, and other relevant           |
| 38 |                   |     | groups (eg, via publication, reporting in results databases, or other            |
| 39 |                   |     | data sharing arrangements), including any publication restrictions ( <b>p.</b>   |
| 40 |                   |     | <b>2, section “Ethics and Dissemination”</b> )                                   |
| 41 |                   |     |                                                                                  |
| 42 |                   | 31b | Authorship eligibility guidelines and any intended use of professional           |
| 43 |                   |     | writers ( <b>n.a., no intended use of professional writers; author’s</b>         |
| 44 |                   |     | <b>contribution are summarized on p. 18</b> )                                    |
| 45 |                   |     |                                                                                  |
| 46 |                   |     |                                                                                  |
| 47 |                   | 31c | Plans, if any, for granting public access to the full protocol, participant-     |
| 48 |                   |     | level dataset, and statistical ( <b>p. 18, section “Availability of data and</b> |
| 49 |                   |     | <b>material”</b> )                                                               |
| 50 |                   |     |                                                                                  |
| 51 |                   |     |                                                                                  |
| 52 | <b>Appendices</b> |     |                                                                                  |
| 53 |                   |     |                                                                                  |
| 54 | Informed consent  | 32  | Model consent form and other related documentation given to                      |
| 55 | materials         |     | participants and authorised surrogates ( <b>n.a., documents in German</b> )      |
| 56 |                   |     |                                                                                  |
| 57 | Biological        | 33  | Plans for collection, laboratory evaluation, and storage of biological           |
| 58 | specimens         |     | specimens for genetic or molecular analysis in the current trial and for         |
| 59 |                   |     | future use in ancillary studies, if applicable ( <b>n.a.</b> )                   |
| 60 |                   |     |                                                                                  |

1 \*It is strongly recommended that this checklist be read in conjunction with the SPIRIT 2013  
2 Explanation & Elaboration for important clarification on the items. Amendments to the  
3 protocol should be tracked and dated. The SPIRIT checklist is copyrighted by the SPIRIT  
4 Group under the Creative Commons "[Attribution-NonCommercial-NoDerivs 3.0 Unported](#)"  
5 license.  
6  
7  
8  
9  
10  
11  
12  
13  
14  
15  
16  
17  
18  
19  
20  
21  
22  
23  
24  
25  
26  
27  
28  
29  
30  
31  
32  
33  
34  
35  
36  
37  
38  
39  
40  
41  
42  
43  
44  
45  
46  
47  
48  
49  
50  
51  
52  
53  
54  
55  
56  
57  
58  
59  
60

For peer review only
